# Supplementary material for: Novel 1,4-Dihydropyridines as Specific Binders and Activators of SIRT3 Impair Cell Viability and Clonogenicity and Downregulate Hypoxia-Induced Targets in Cancer Cells
Source: PubMed Central journal article supplement (PMC10388363; doi:10.1021/acs.jmedchem.3c00337), 2023-07-13
Supplement: jm3c00337_si_001.pdf [file jm3c00337_si_001.pdf]

## Supporting Information

### Novel 1,4-Dihydropyridines as Specific Binders and Activators of SIRT3 Impair Cell Viability and Clonogenicity, and Downregulate Hypoxia-Induced Targets in Cancer Cells

Clemens Zwergel,<sup>a,¶</sup> Michele Aventaggiato,<sup>b,¶</sup> Sabrina Garbo,<sup>c,¶</sup> Elisabetta Di Bello,<sup>a</sup> Bruno Fassari,<sup>d</sup> Beatrice Noce,<sup>a</sup> Carola Castiello,<sup>a</sup> Chiara Lambona,<sup>a</sup> Federica Barreca,<sup>b</sup> Dante Rotili,<sup>a</sup> Rossella Fioravanti,<sup>a</sup> Thomas Schmalz,<sup>e</sup> Michael Weyand,<sup>f</sup> Amelie Niedermeier,<sup>f</sup> Marco Tripodi,<sup>c</sup> Gianni Colotti,<sup>g</sup> Clemens Steegborn,<sup>e</sup> Cecilia Battistelli,<sup>c,\*</sup> Marco Tafani,<sup>b,\*</sup> Sergio Valente,<sup>a,\*</sup> and Antonello Mai<sup>a,h</sup>

<sup>a</sup>*Department of Drug Chemistry and Technologies, Sapienza University of Rome, Piazzale Aldo Moro 5, 00185 Rome, Italy*

<sup>b</sup>*Department of Experimental Medicine, Sapienza University of Rome, Viale Regina Elena 324, 00161 Rome, Italy*

<sup>c</sup>*Department of Molecular Medicine, "Department of Excellence 2023-2027", Sapienza University of Rome, Viale Regina Elena 324, 00161 Rome, Italy.*

<sup>d</sup>*Dompé Farmaceutici S.p.A, Via Campo di Pile snc, 67100 L'Aquila, Italy*

<sup>e</sup>*University of Bayreuth, Dept. Organic Chemistry, Universitätsstr. 30, 95447 Bayreuth, Germany.*

<sup>f</sup>*University of Bayreuth, Dept. Biochemistry, Universitätsstr. 30, 95447 Bayreuth, Germany.*

<sup>g</sup>*Institute of Molecular Biology and Pathology, Italian National Research Council, Piazzale A.Moro 5, 20 Rome, Italy*

<sup>h</sup>*Pasteur Institute, Cenci-Bolognetti Foundation, Sapienza University of Rome, P.le A. Moro 5, 00185 Rome, Italy.*

\* Corresponding authors:

(C. Battistelli) E-mail address: [cecilia.battistelli@uniroma1.it](mailto:cecilia.battistelli@uniroma1.it)

(M. Tafani) E-mail address: [marco.tafani@uniroma1.it](mailto:marco.tafani@uniroma1.it)

(S. Valente) E-mail address: [sergio.valente@uniroma1.it](mailto:sergio.valente@uniroma1.it)

## Index:

|                                                                                                                                                                                                            |     |
|------------------------------------------------------------------------------------------------------------------------------------------------------------------------------------------------------------|-----|
| Table S1. Chemical and Physical data of Final Compounds 2a-n and 3a-d .....                                                                                                                                | S3  |
| <sup>1</sup> H and <sup>13</sup> C spectra of final compounds 2a-n and 3a-d .....                                                                                                                          | S6  |
| IR spectra and HPLC traces of final compounds 2a-n and 3a-d and high resolution mass spectra for final compounds 3a-d.....                                                                                 | S24 |
| Table S2. Elemental analysis of final compounds 2a-n and 3a-d.....                                                                                                                                         | S64 |
| Figure S1. Control experiments for potential compound effects on the coupled enzymes of the assay system. ....                                                                                             | S65 |
| Figure S2. Representative plate images of the colony formation assay for CAL-62 and MDA-MB-231 cells treated with the SIRT3 activators 3a-d at 50 μM for 24 and 48 h.....                                  | S66 |
| Figure S3. Representative plate images of the colony formation assay for CAL-62 and MDA-MB-231 cells treated with increasing dose (1, 5, 10, 25 and 50 μM) of the SIRT3 activator 3d for 24 and 48 h. .... | S67 |
| Figure S4. Dose-dependent effects of compound 3d on cell viability, cell death and clonogenicity in CAL-62 (A, C, E) and MDA-MB-231 (B, D, F) cells upon 24 h of treatment.....                            | S68 |
| Table S3. List of Primers used in gene expression analysis.....                                                                                                                                            | S69 |
| Figure S5. Dose-dependent effects of compounds 3c and 3d on cell viability (A, B) and cell death (C, D) non-tumoral HaCaT cells upon 24h (A, C) and 48h (B, D) of treatment.....                           | S69 |
| Tables S4 (A-D). Quantification of living (A, B) and death cells (C, D) upon 24h (A, C) and 48h (B, D) of treatment relative to three independent experiments. Cell lines are indicated.....               | S70 |

**Table S1. Chemical and Physical data of Final Compounds 2a-n and 3a-d**

| Bayreuth code | Lab Code | Compound | Chemical structure                                                                  | M.P. (°C) | Yield  |
|---------------|----------|----------|-------------------------------------------------------------------------------------|-----------|--------|
| UBCS392       | MC4199   | 2a       | 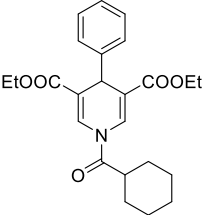   | 92-93°C   | 17.0%  |
| UBCS399       | MC4158   | 2b       |    | 124-125°C | 85,2 % |
| UBCS400       | MC4168   | 2c       |    | 123-124°C | 93,6 % |
| UBCS401       | MC4172   | 2d       |   | 154-155°C | 61.8 % |
| UBCS402       | MC4166   | 2e       |  | 122-123°C | 65.0%  |
| UBCS403       | MC4181   | 2f       |  | 154-155°C | 68,7 % |
| UBCS404       | MC4185   | 2g       |  | 140-141°C | 71,6 % |
| UBCS393       | MC4165   | 2h       |  | 147-148°C | 63,1 % |

|         |        |    |                                                                                     |           |        |
|---------|--------|----|-------------------------------------------------------------------------------------|-----------|--------|
| UBCS394 | MC4167 | 2i | 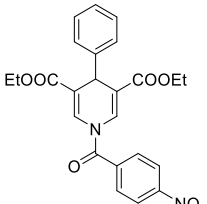   | 109-110°C | 65,6 % |
| UBCS405 | MC4177 | 2j |    | 155-156°C | 60,4 % |
| UBCS409 | MC4208 | 2k |    | 153-154°C | 14,1 % |
| UBCS408 | MC4204 | 2l |   | 125-126°C | 12,2 % |
| UBCS406 | MC4188 | 2m |  | 142-143°C | 56,4%  |
| UBCS407 | MC4186 | 2n |  | 114-115°C | 51,2%  |
| UBCS395 | MC4164 | 3a |  | 134-135°C | 58,2 % |
| UBCS396 | MC4182 | 3b |  | 131-132°C | 17,9%  |

|         |        |    |                                                                                   |           |        |
|---------|--------|----|-----------------------------------------------------------------------------------|-----------|--------|
| UBCS398 | MC4175 | 3c | 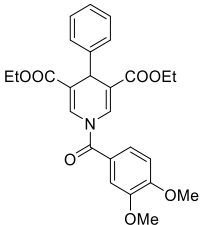 | 174-175°C | 27,6 % |
| UBCS397 | MC4176 | 3d |  | 159-160°C | 64, 3% |

**<sup>1</sup>H and <sup>13</sup>C spectra of final compounds 2a-n and 3a-d**

|         |        |    |                                                                                    |
|---------|--------|----|------------------------------------------------------------------------------------|
| UBCS392 | MC4199 | 2a | 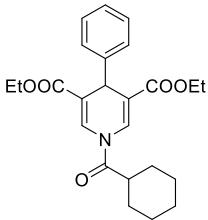 |
|---------|--------|----|------------------------------------------------------------------------------------|

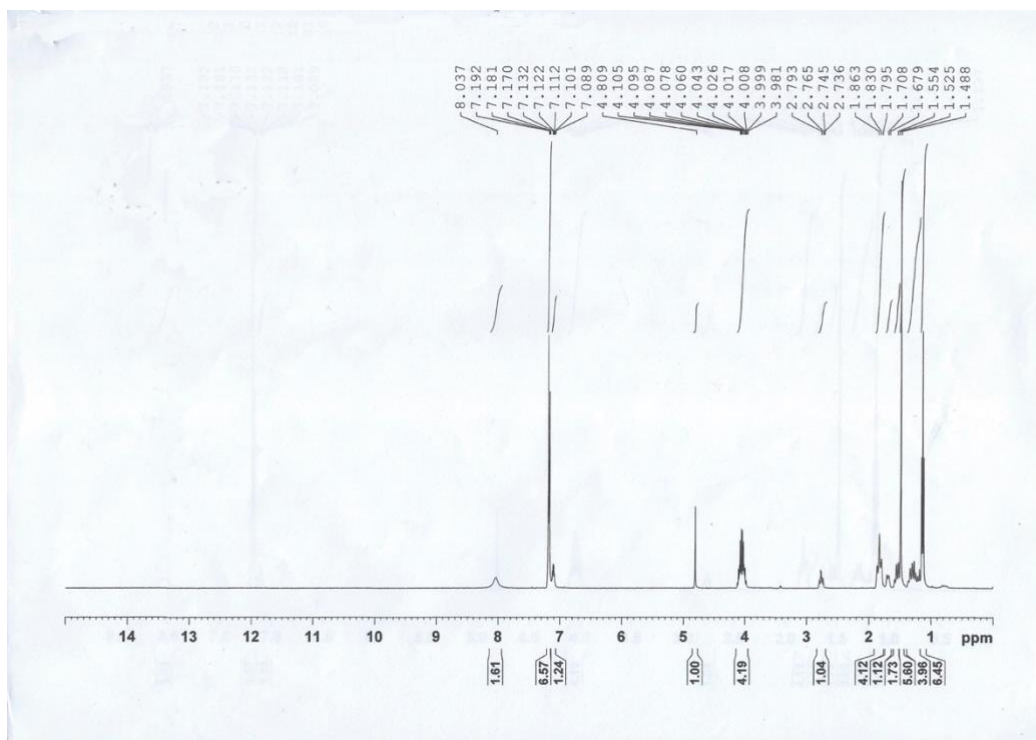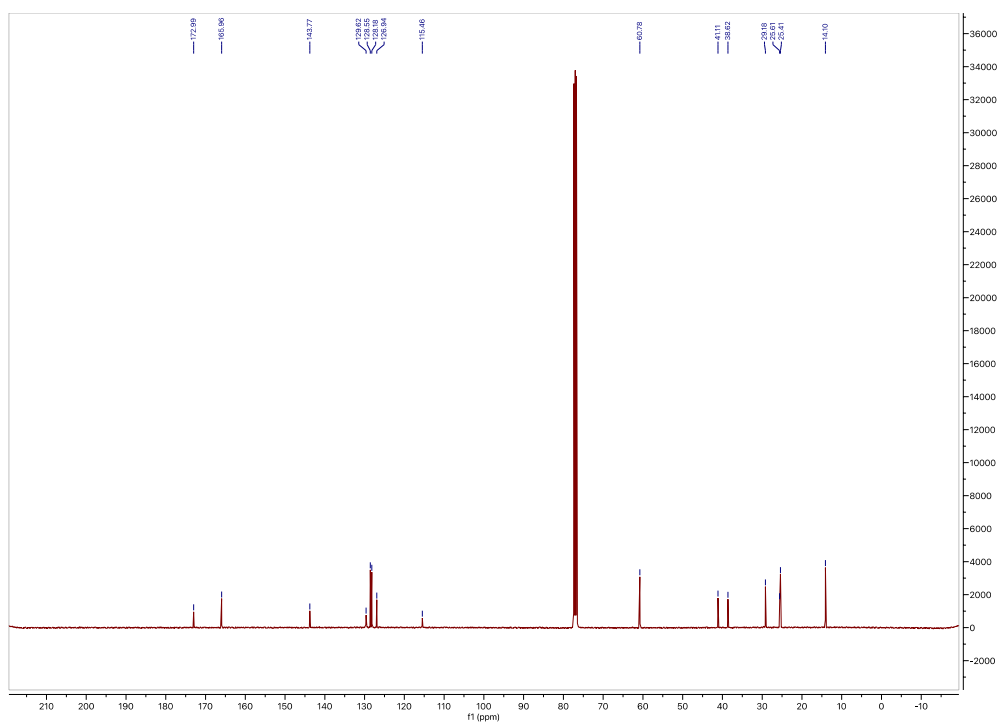

|         |        |    |                                                                                    |
|---------|--------|----|------------------------------------------------------------------------------------|
| UBCS399 | MC4158 | 2b | 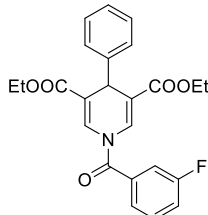 |
|---------|--------|----|------------------------------------------------------------------------------------|

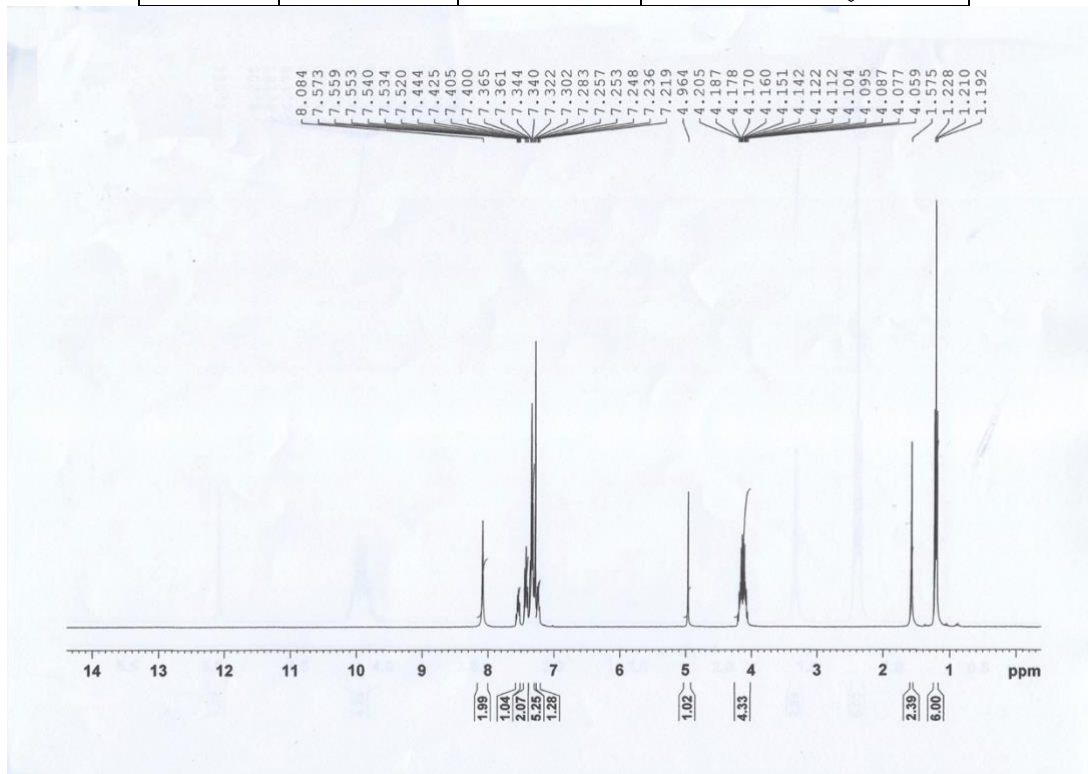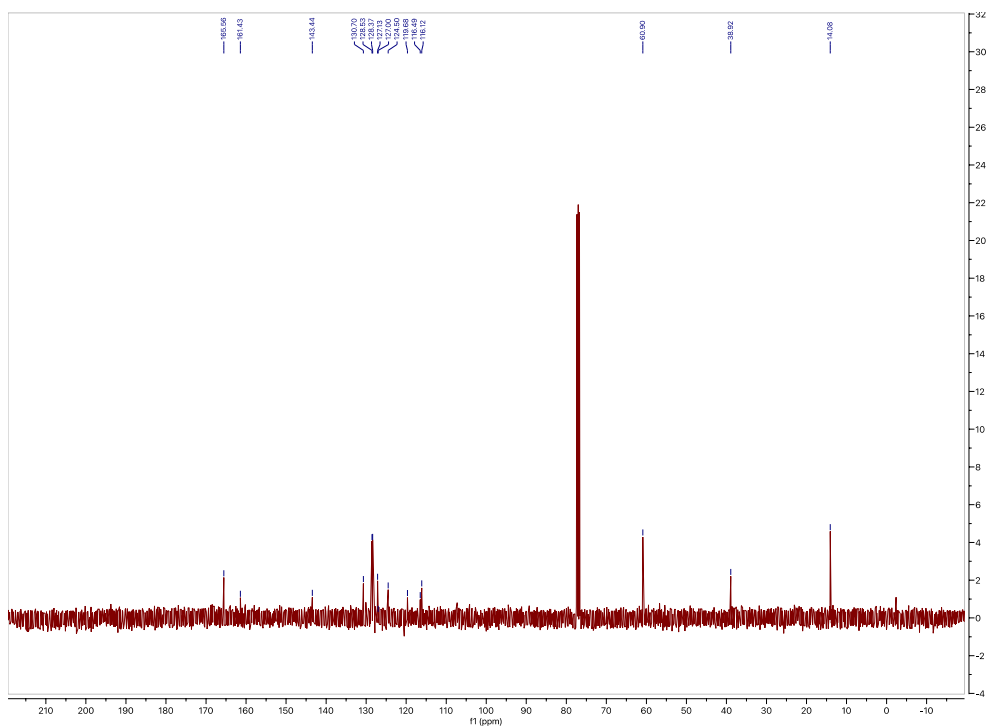

|         |        |    |                                                                                    |
|---------|--------|----|------------------------------------------------------------------------------------|
| UBCS400 | MC4168 | 2c | 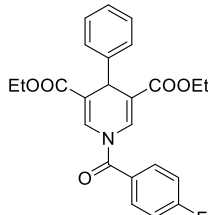 |
|---------|--------|----|------------------------------------------------------------------------------------|

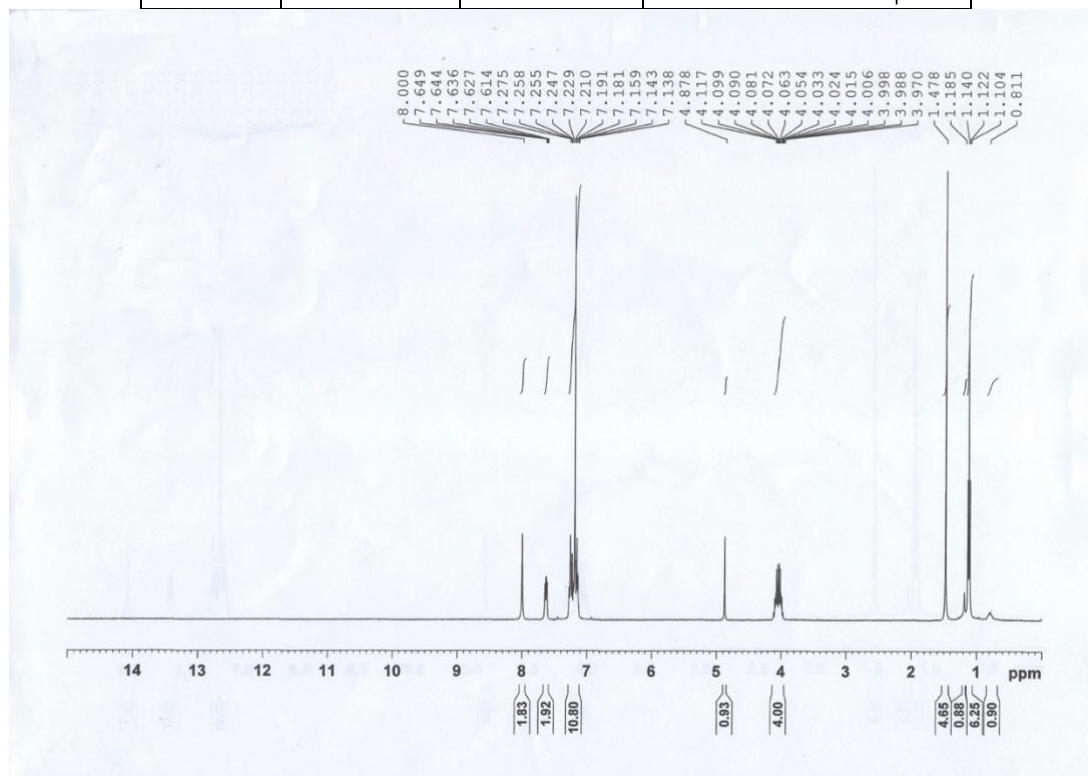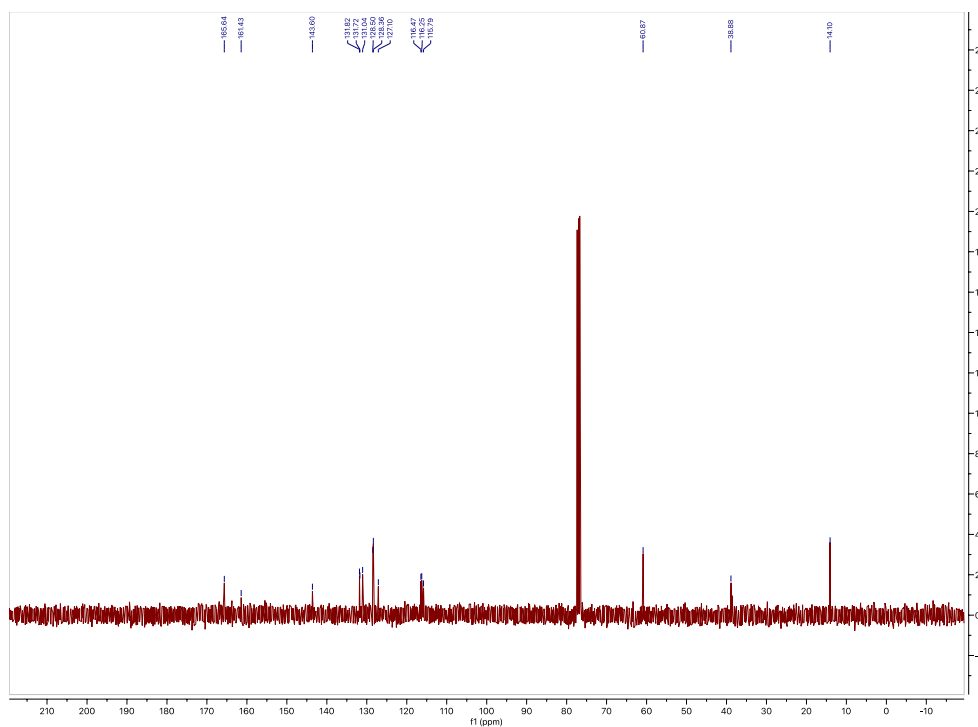



|         |        |    |                                                                                    |
|---------|--------|----|------------------------------------------------------------------------------------|
| UBCS401 | MC4172 | 2d | 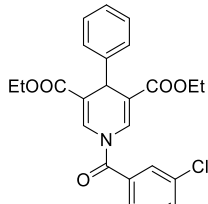 |
|---------|--------|----|------------------------------------------------------------------------------------|

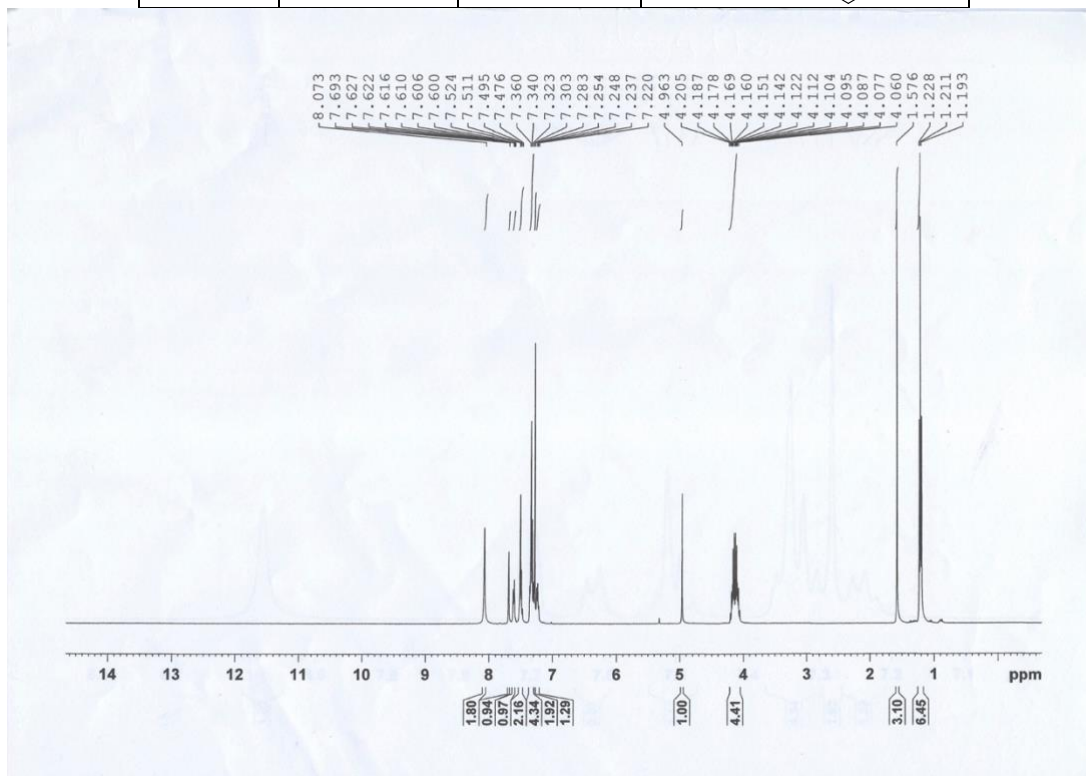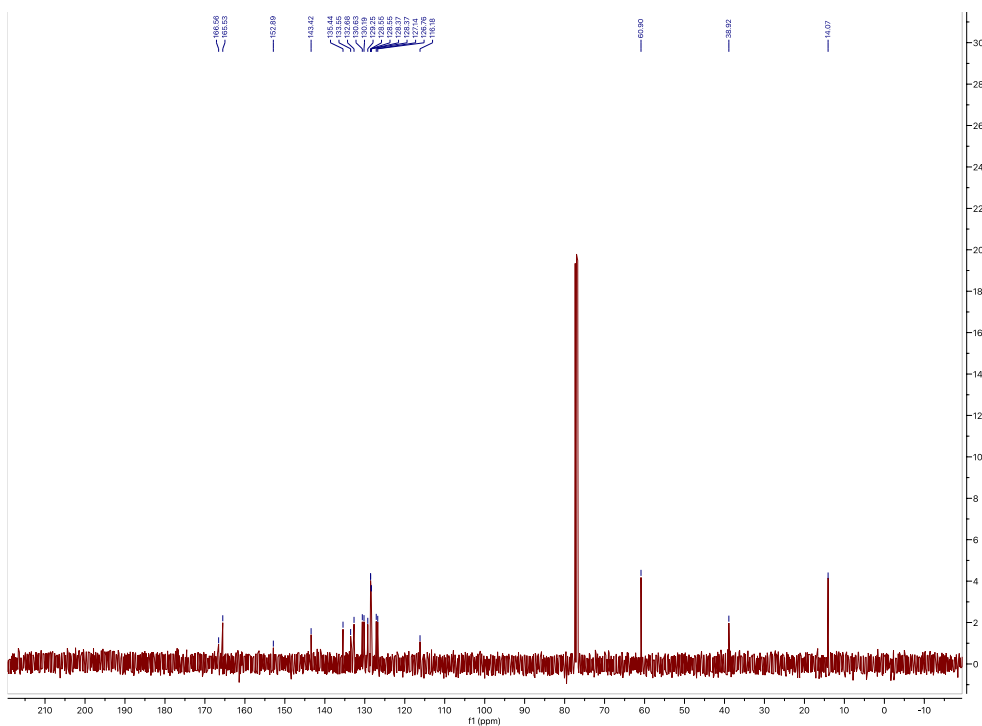

|         |        |    |                                                                                    |
|---------|--------|----|------------------------------------------------------------------------------------|
| UBCS402 | MC4166 | 2e | 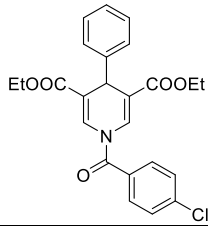 |
|---------|--------|----|------------------------------------------------------------------------------------|

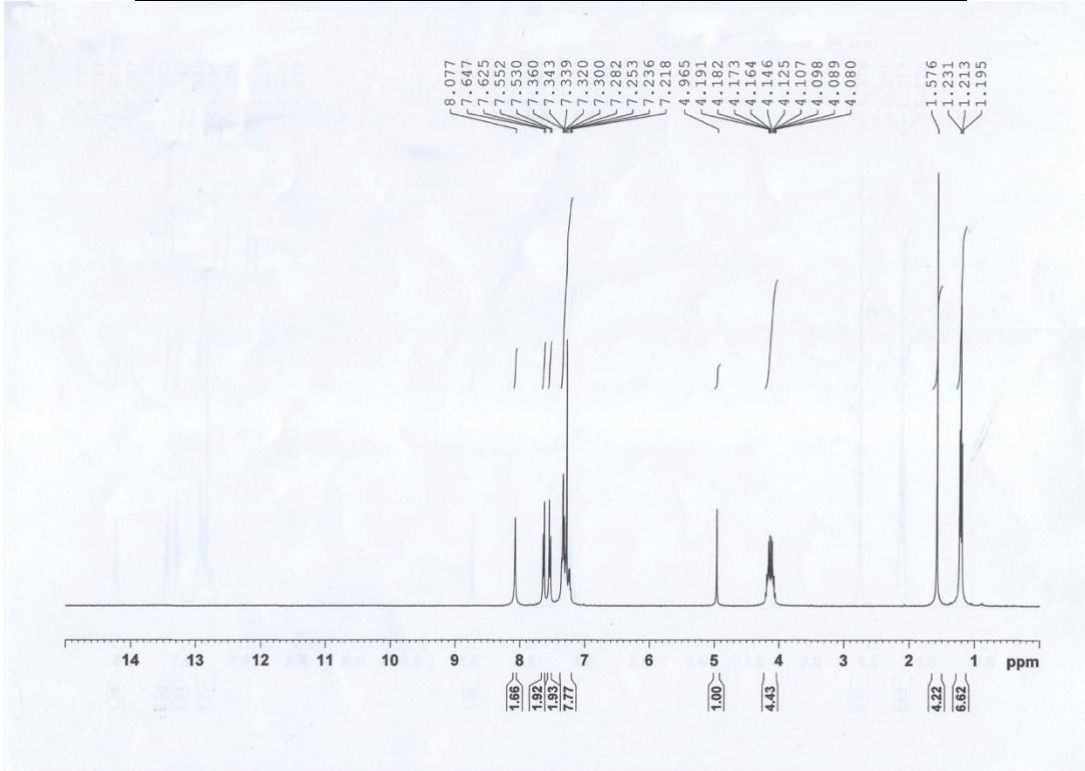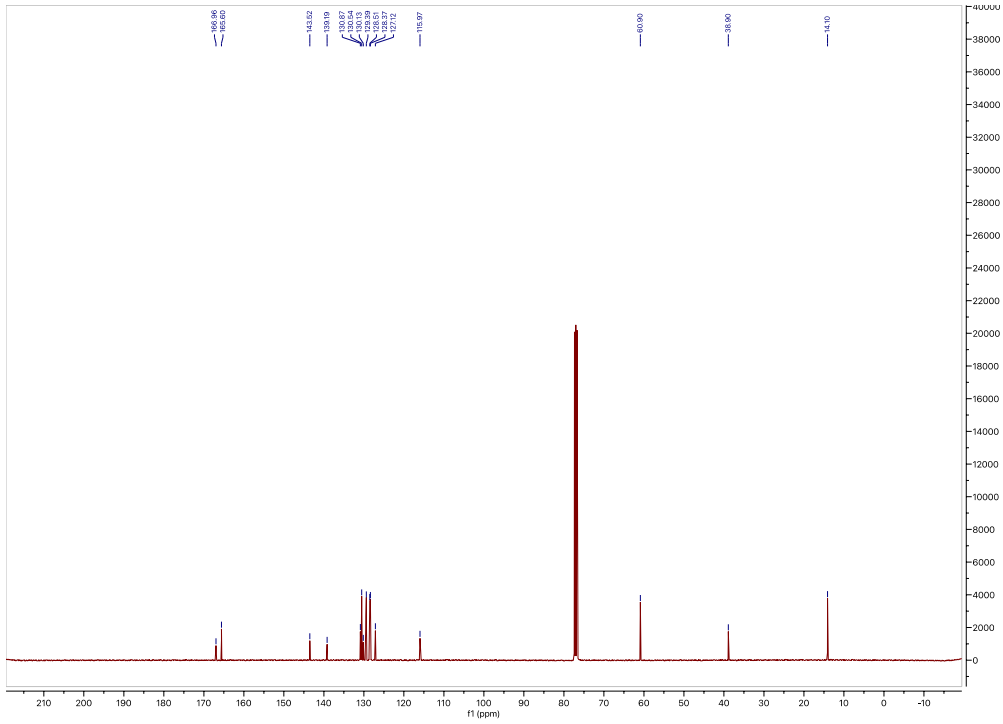

|         |        |    |                                                                                    |
|---------|--------|----|------------------------------------------------------------------------------------|
| UBCS403 | MC4181 | 2f | 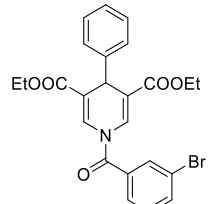 |
|---------|--------|----|------------------------------------------------------------------------------------|

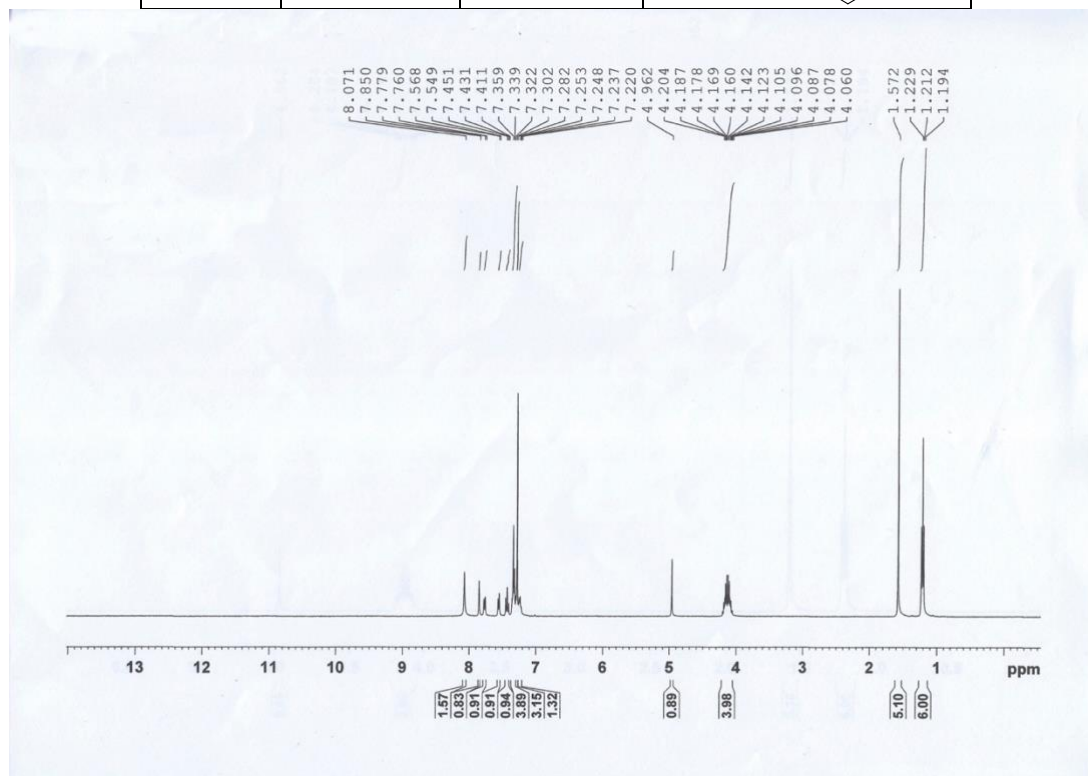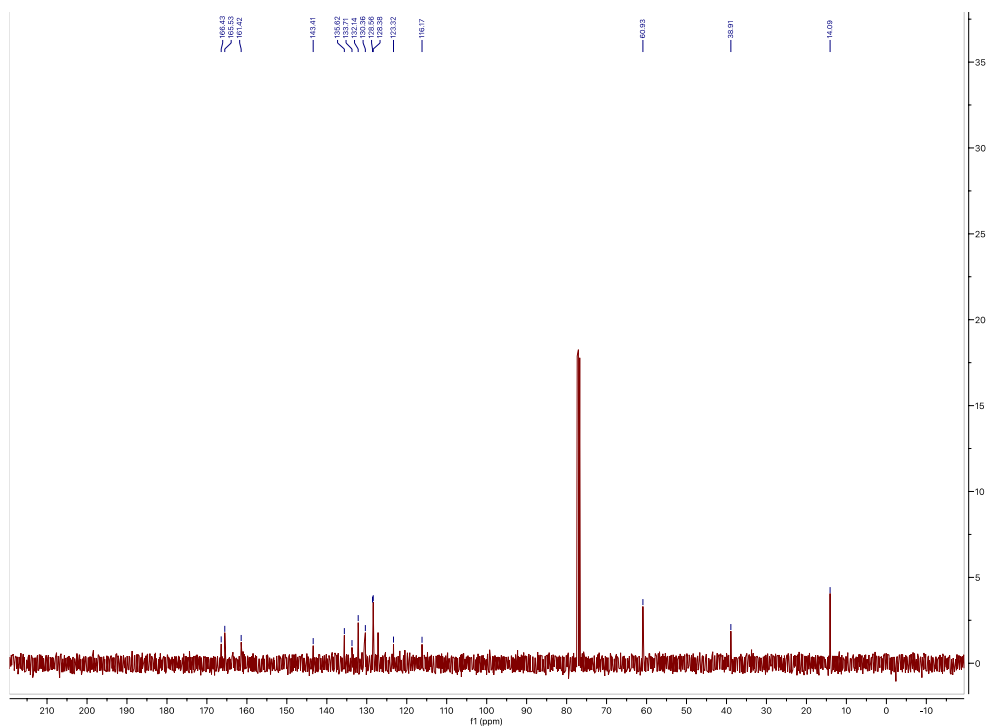

|         |        |    |                                                                                    |
|---------|--------|----|------------------------------------------------------------------------------------|
| UBCS404 | MC4185 | 2g | 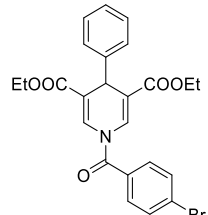 |
|---------|--------|----|------------------------------------------------------------------------------------|

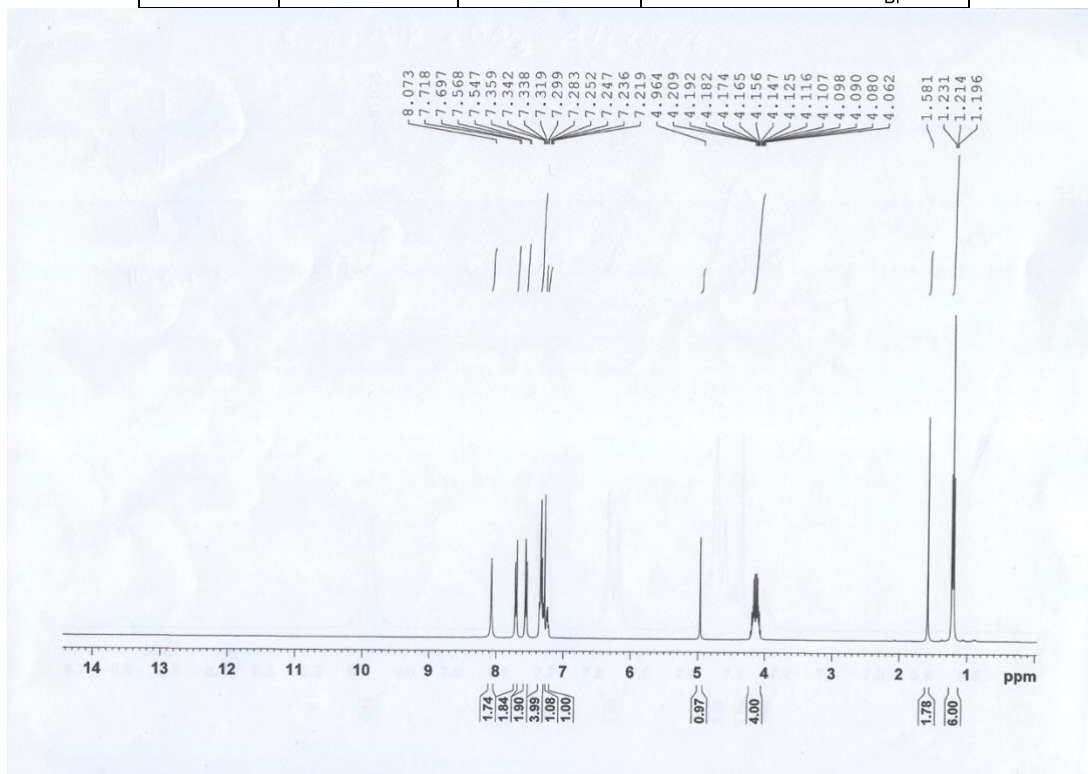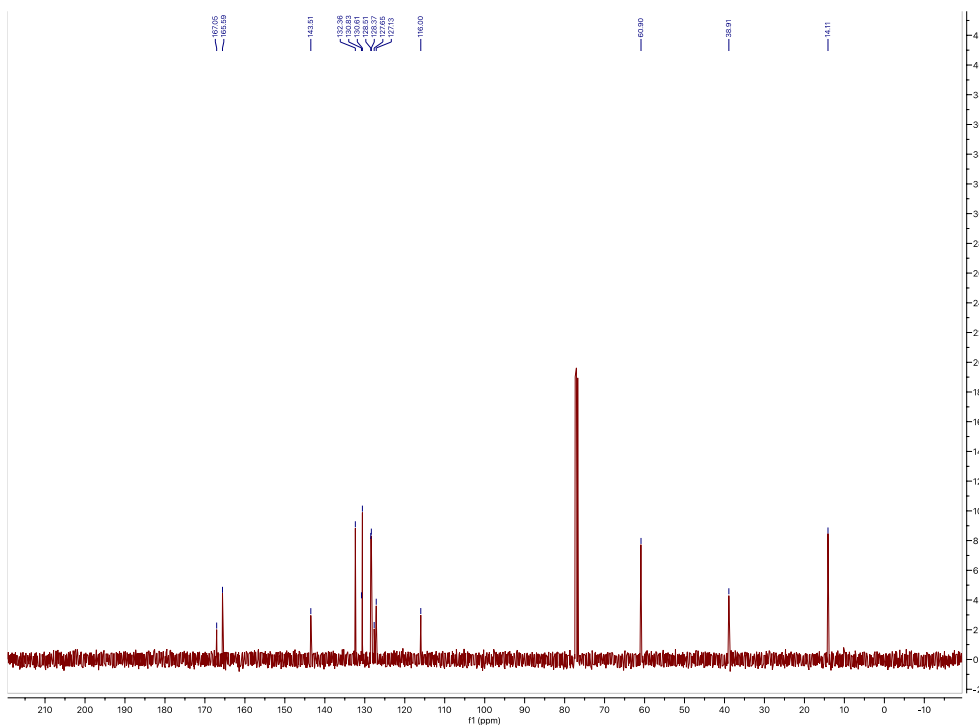

|         |        |    |                                                                                    |
|---------|--------|----|------------------------------------------------------------------------------------|
| UBCS393 | MC4165 | 2h | 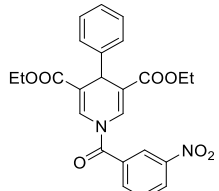 |
|---------|--------|----|------------------------------------------------------------------------------------|

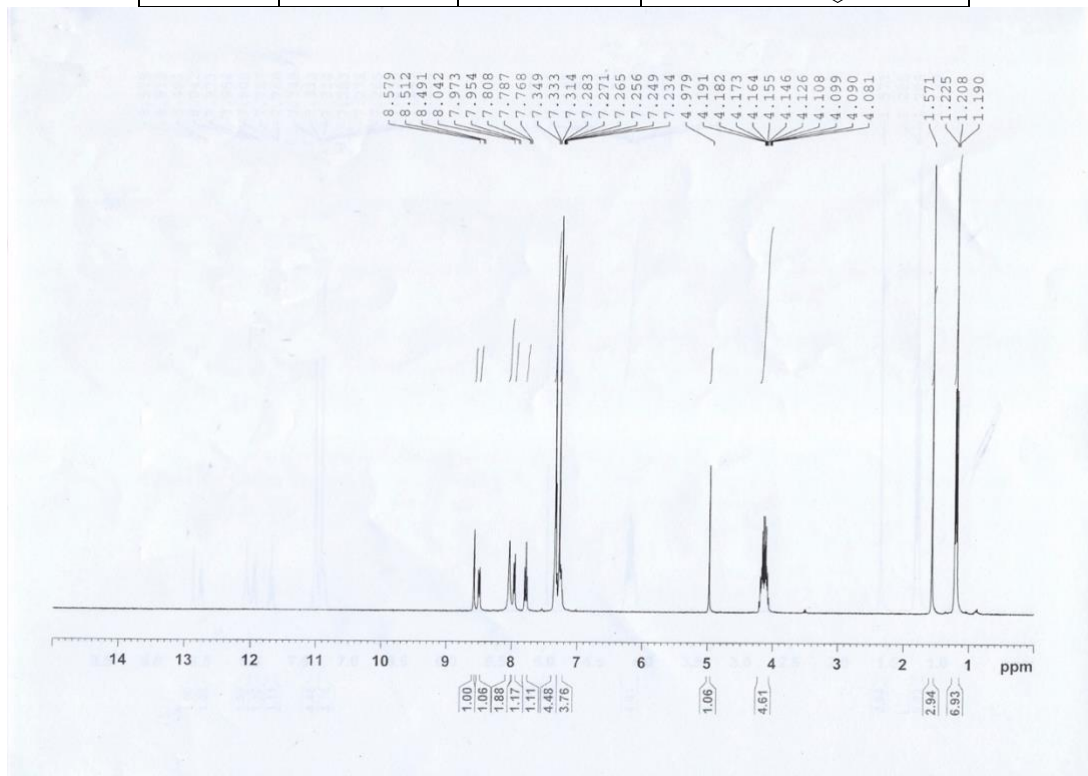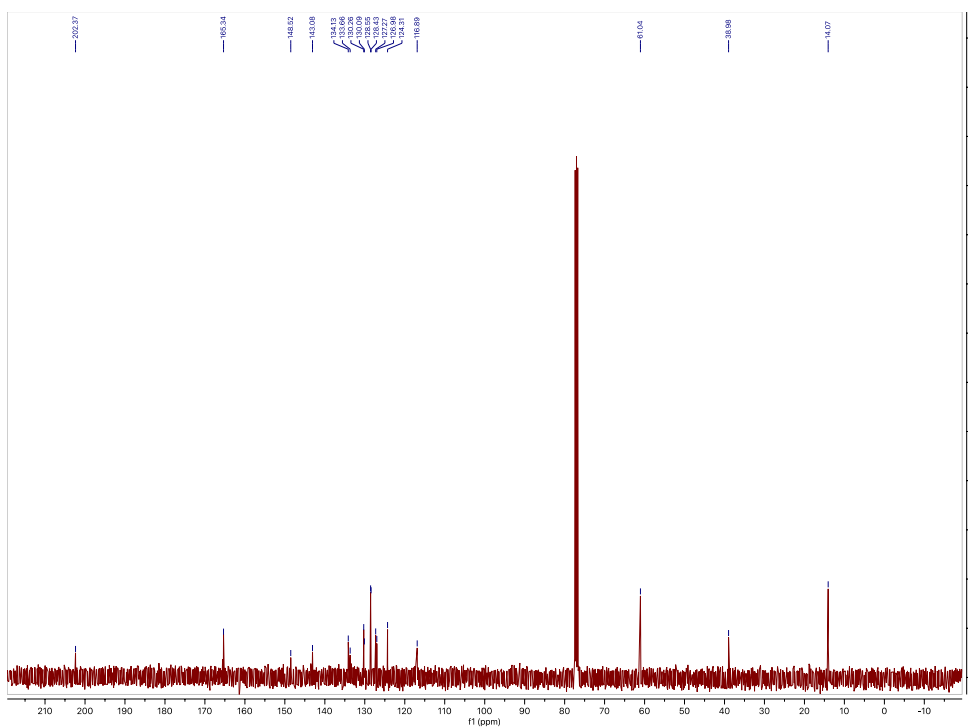

|         |        |    |                                                                                    |
|---------|--------|----|------------------------------------------------------------------------------------|
| UBCS394 | MC4167 | 2i | 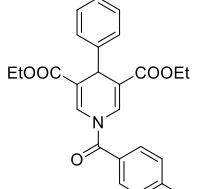 |
|---------|--------|----|------------------------------------------------------------------------------------|

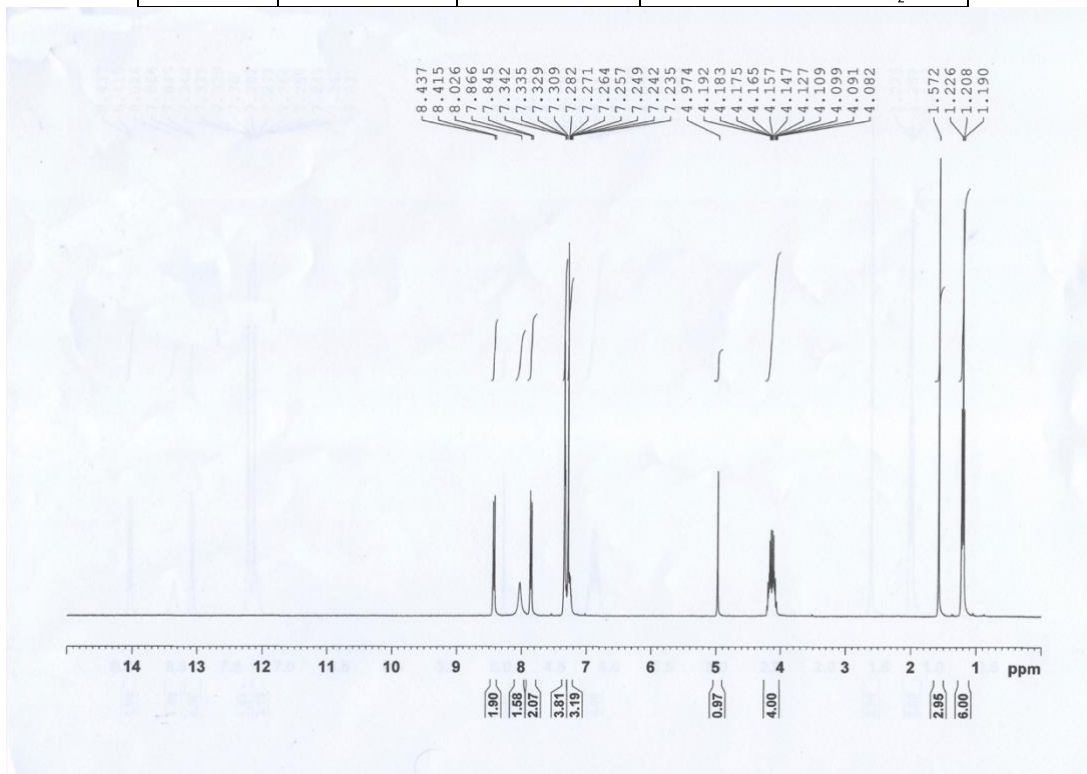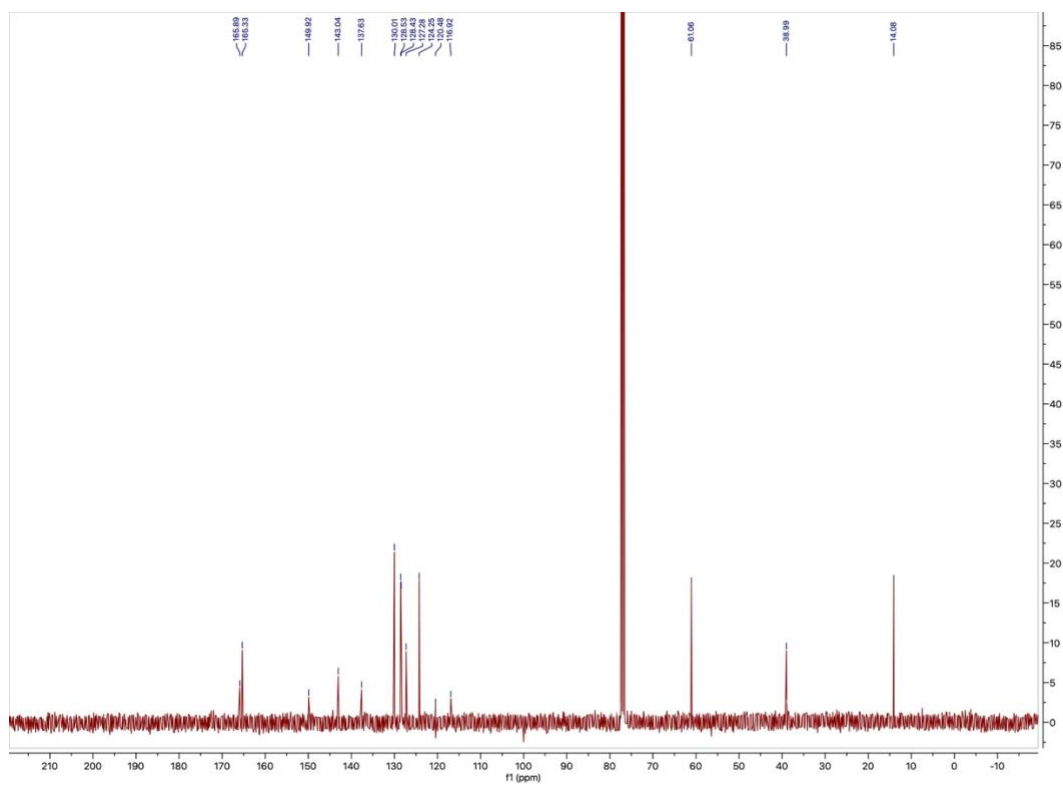

|         |        |    |                                                                                    |
|---------|--------|----|------------------------------------------------------------------------------------|
| UBCS405 | MC4177 | 2j | 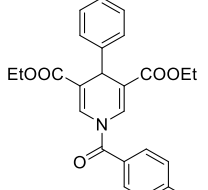 |
|---------|--------|----|------------------------------------------------------------------------------------|

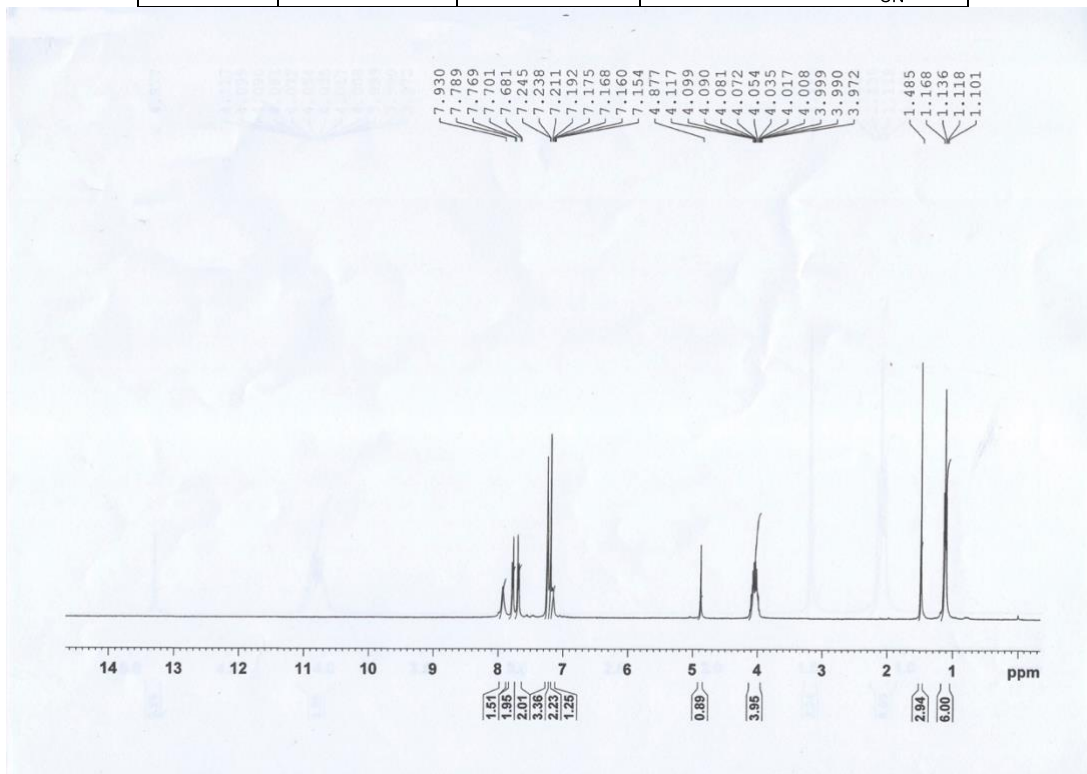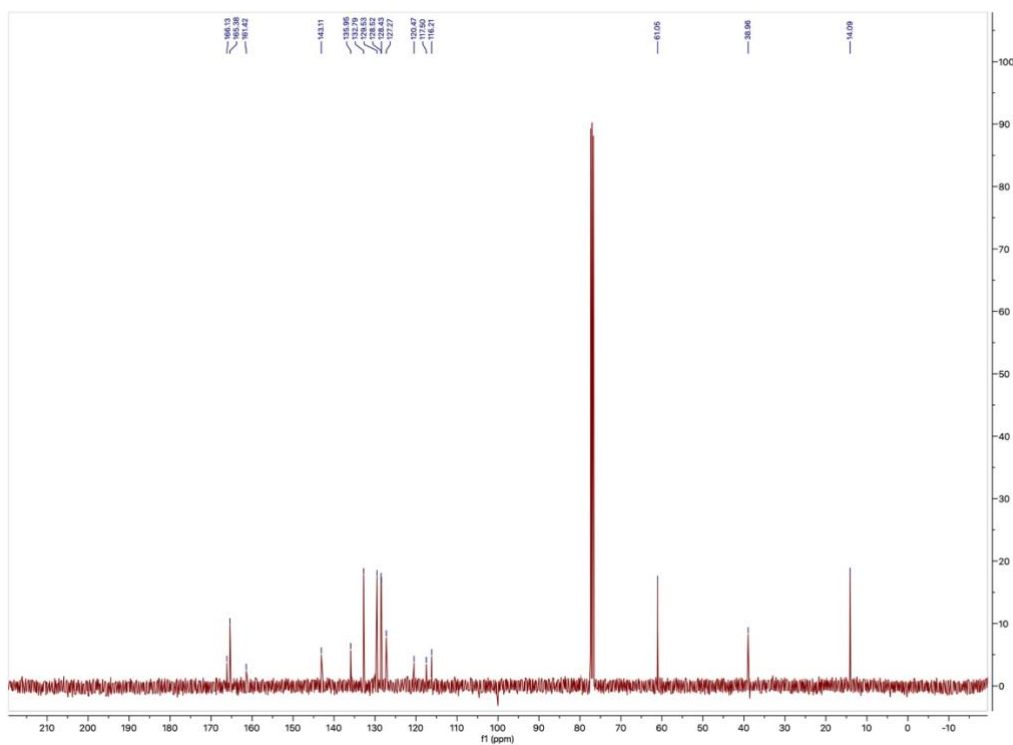

|                |               |           |                                                                                    |
|----------------|---------------|-----------|------------------------------------------------------------------------------------|
| <b>UBCS409</b> | <b>MC4208</b> | <b>2k</b> | 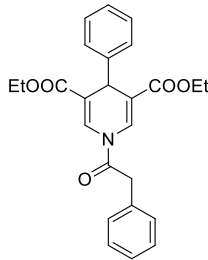 |
|----------------|---------------|-----------|------------------------------------------------------------------------------------|

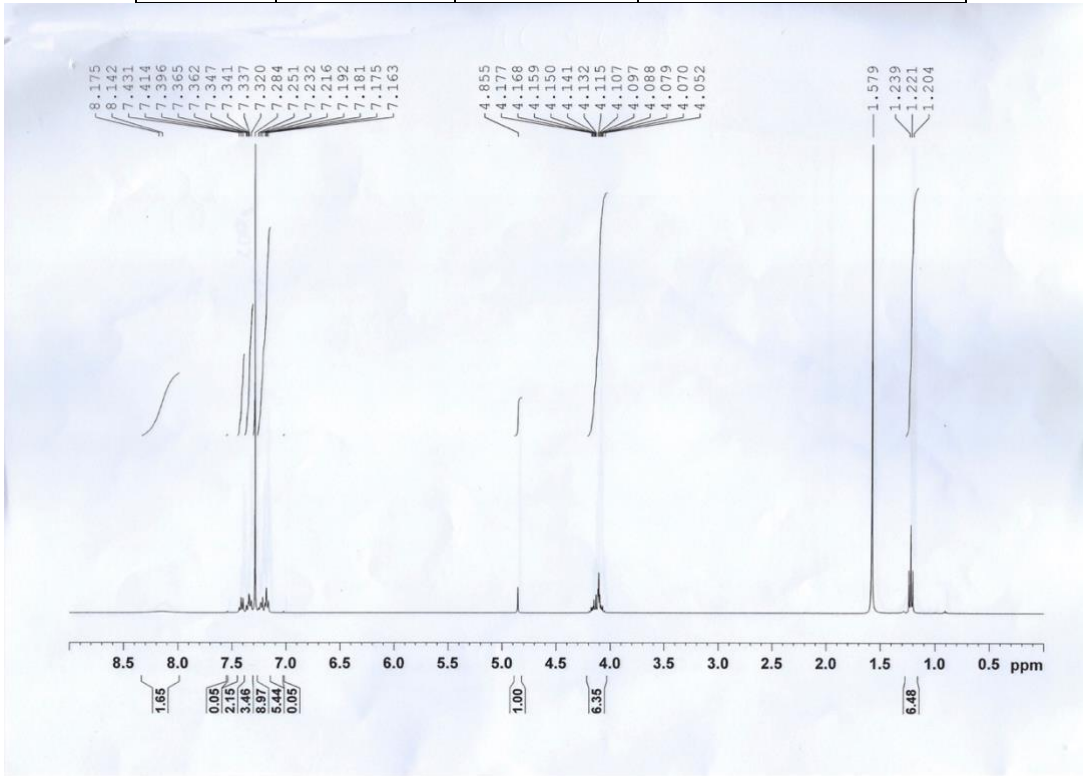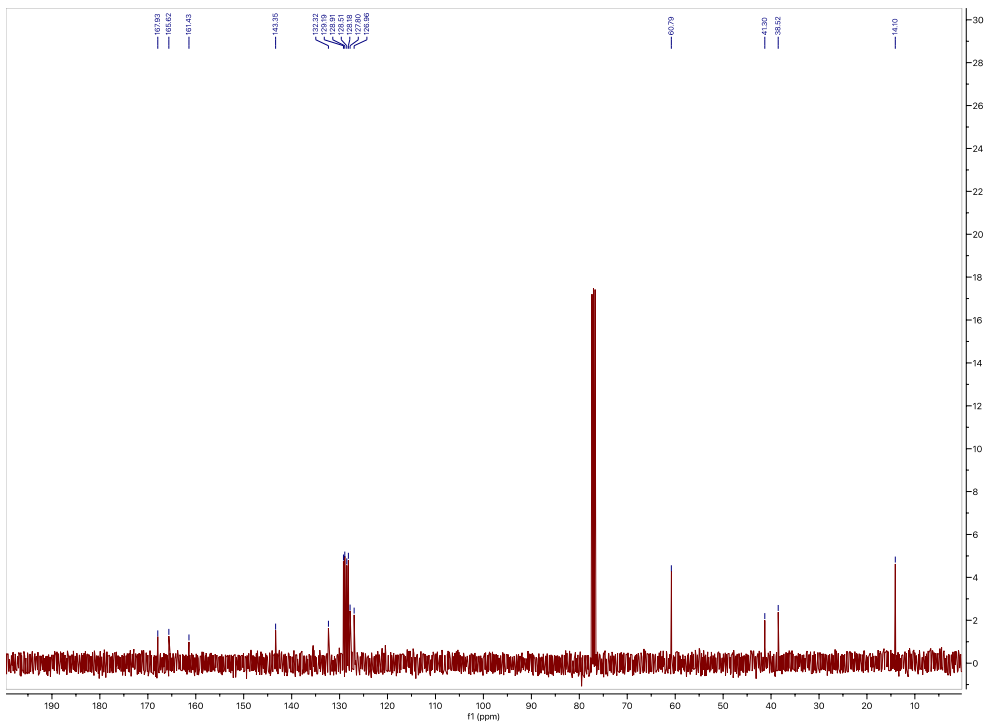



|         |        |    |                                                                                    |
|---------|--------|----|------------------------------------------------------------------------------------|
| UBCS408 | MC4204 | 21 | 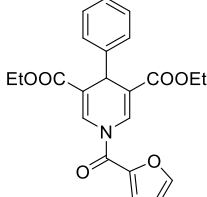 |
|---------|--------|----|------------------------------------------------------------------------------------|

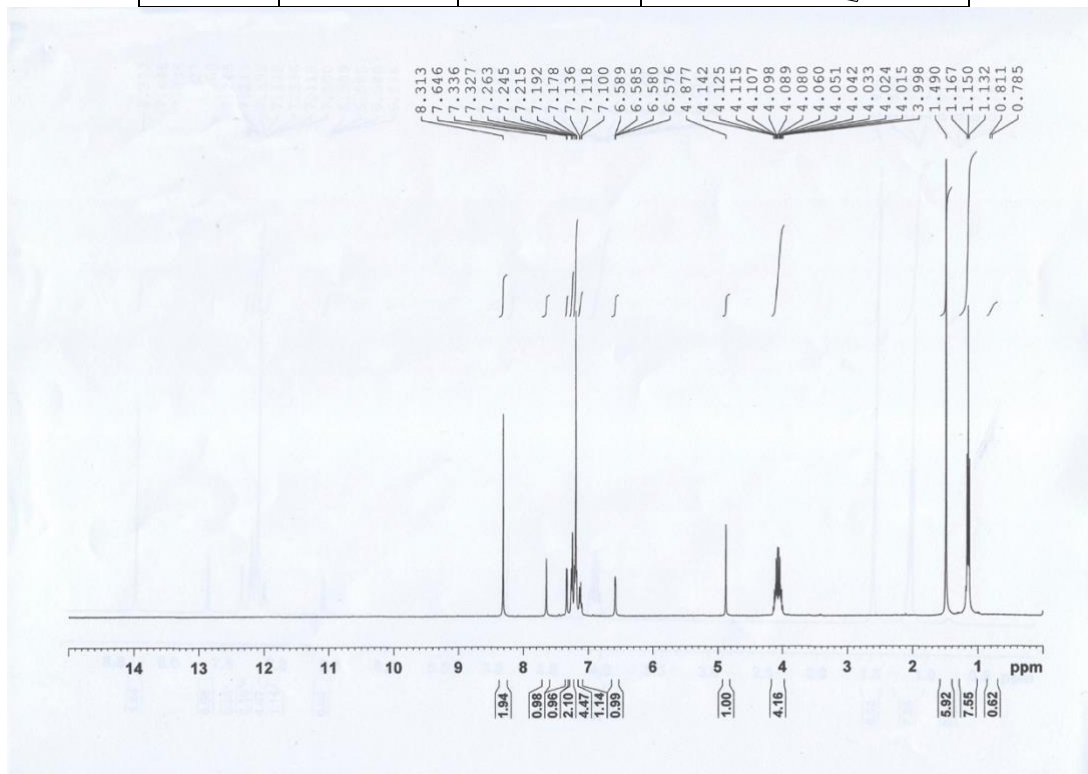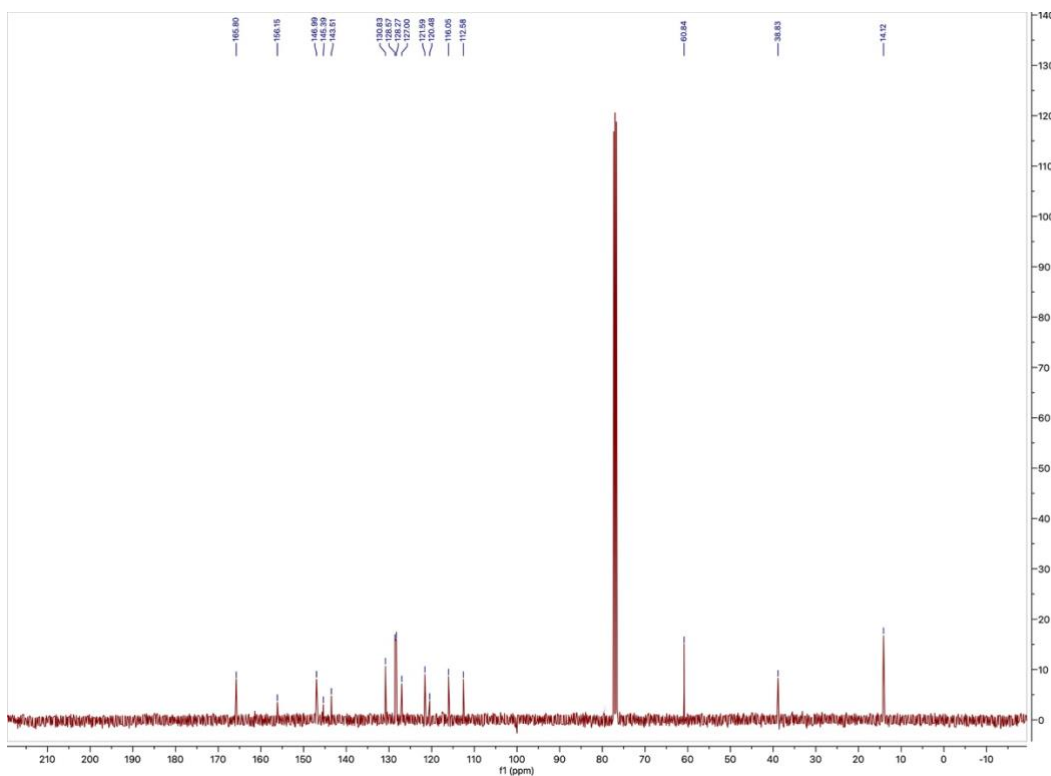

|         |        |    |                                                                                    |
|---------|--------|----|------------------------------------------------------------------------------------|
| UBCS406 | MC4188 | 2m | 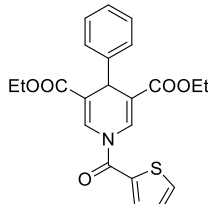 |
|---------|--------|----|------------------------------------------------------------------------------------|

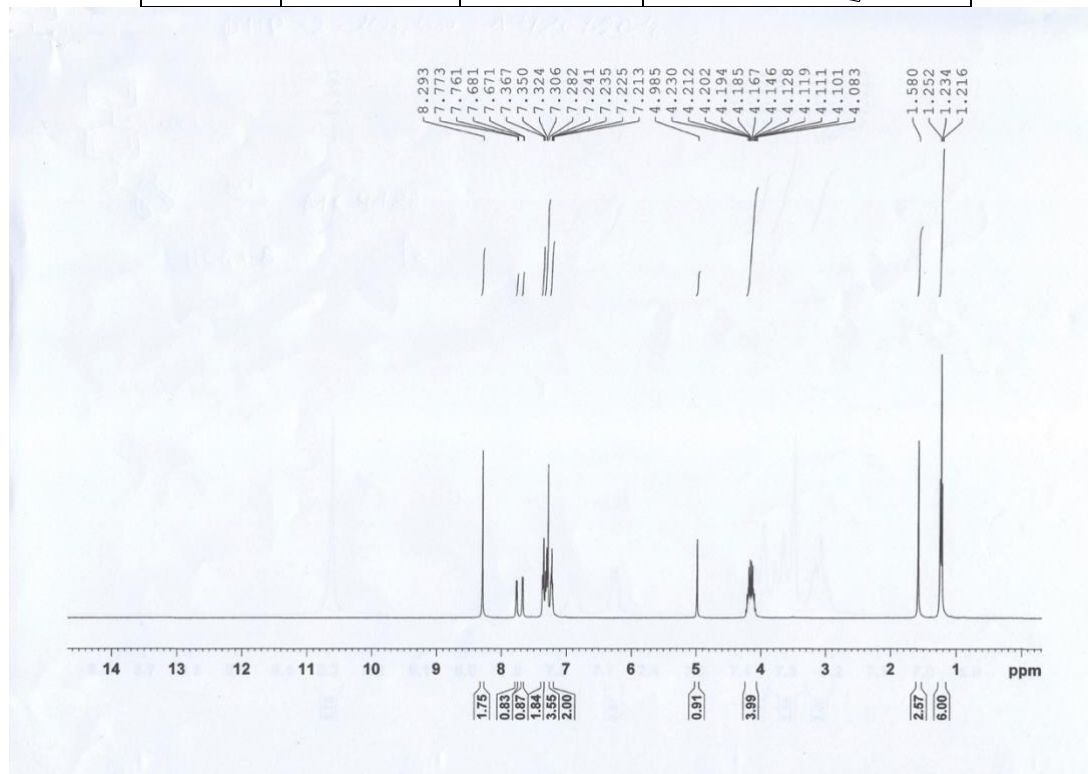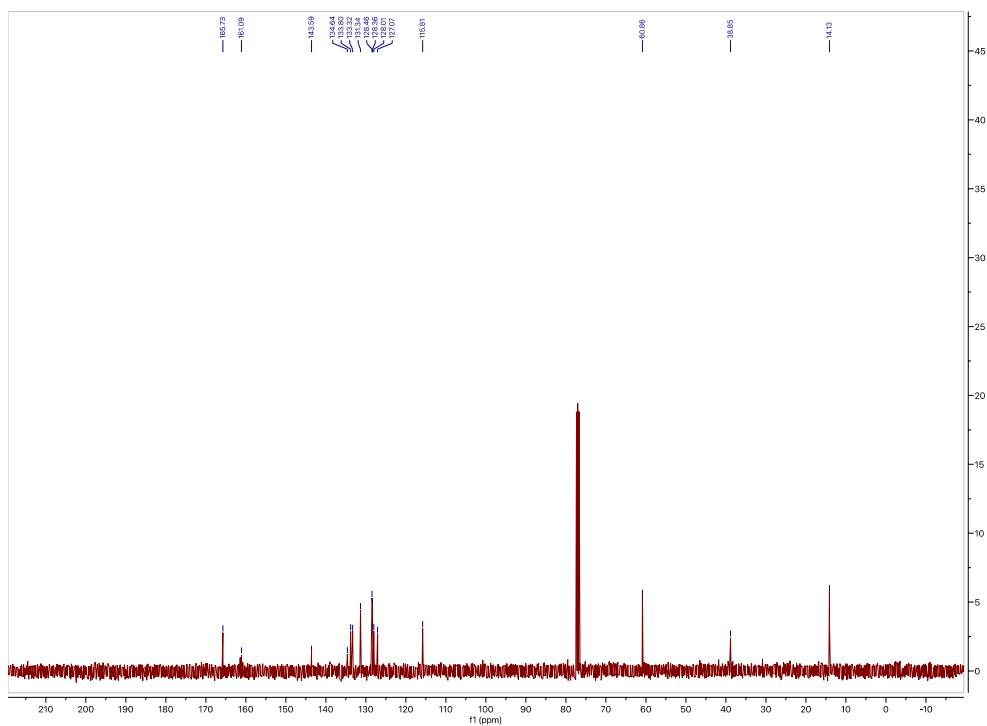

|         |        |    |                                                                                    |
|---------|--------|----|------------------------------------------------------------------------------------|
| UBCS407 | MC4186 | 2n | 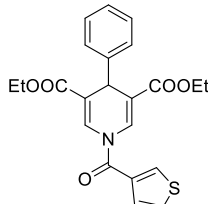 |
|---------|--------|----|------------------------------------------------------------------------------------|

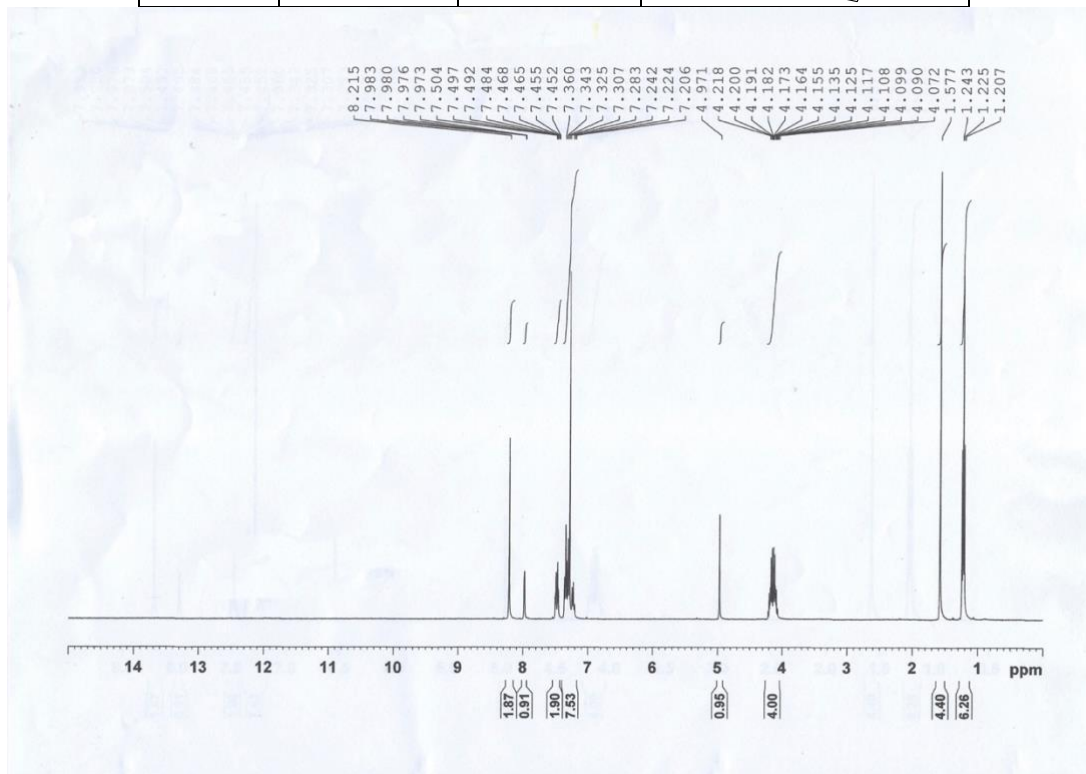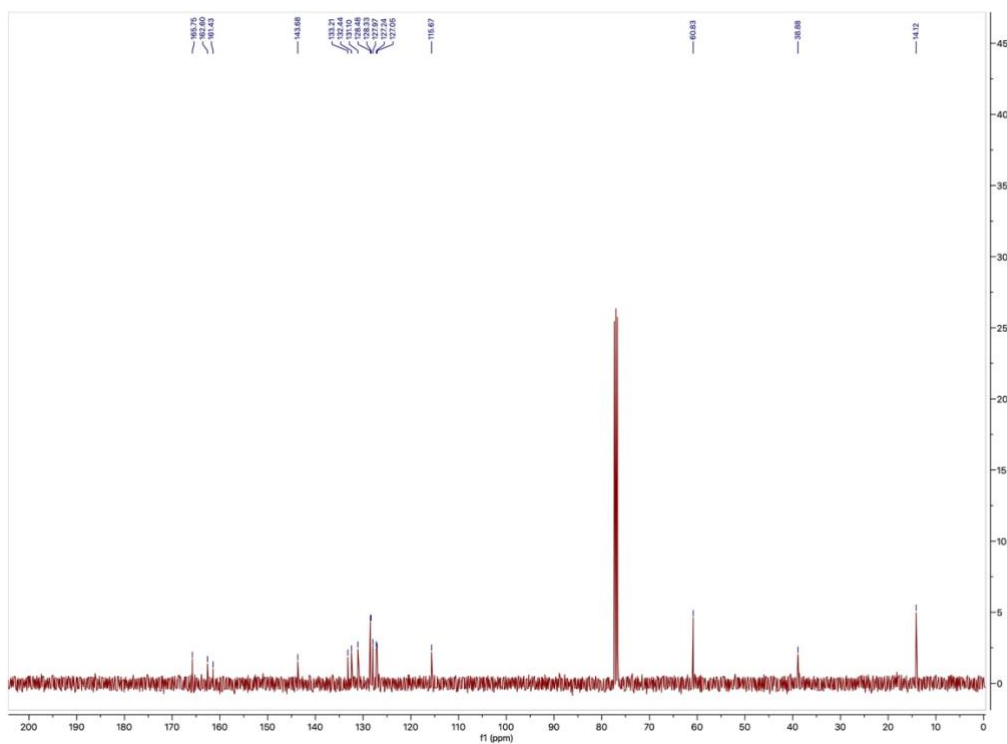

|                |               |           |                                                                                    |
|----------------|---------------|-----------|------------------------------------------------------------------------------------|
| <b>UBCS395</b> | <b>MC4164</b> | <b>3a</b> | 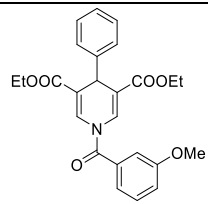 |
|----------------|---------------|-----------|------------------------------------------------------------------------------------|

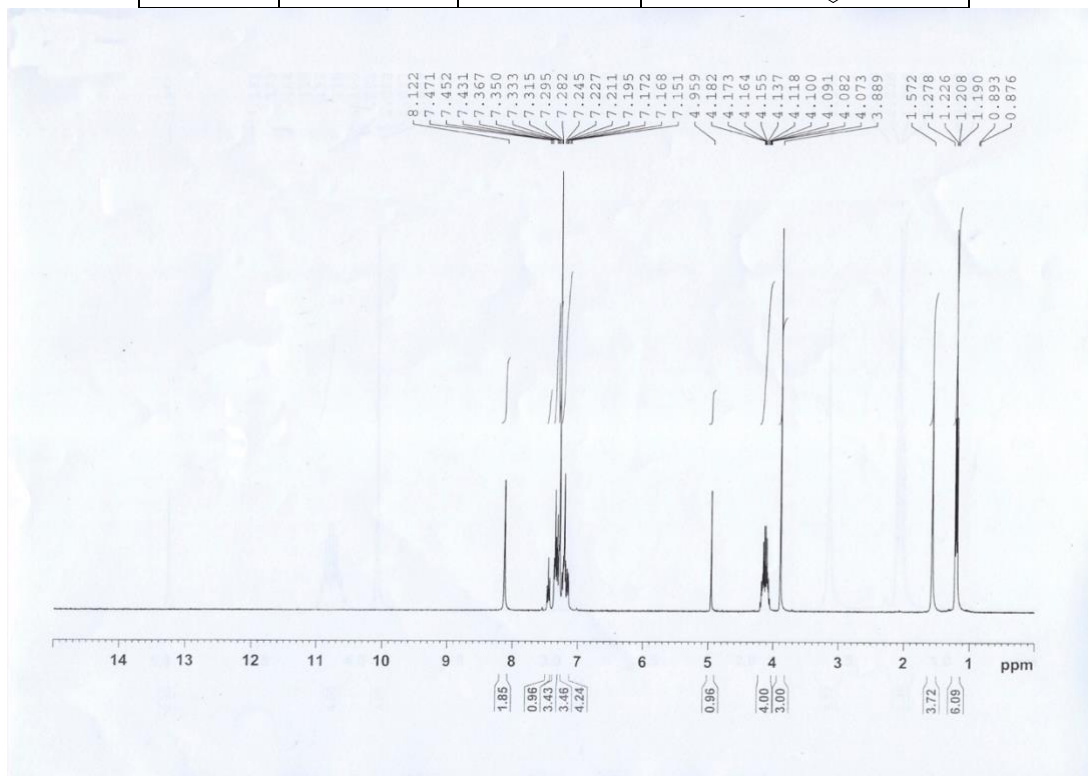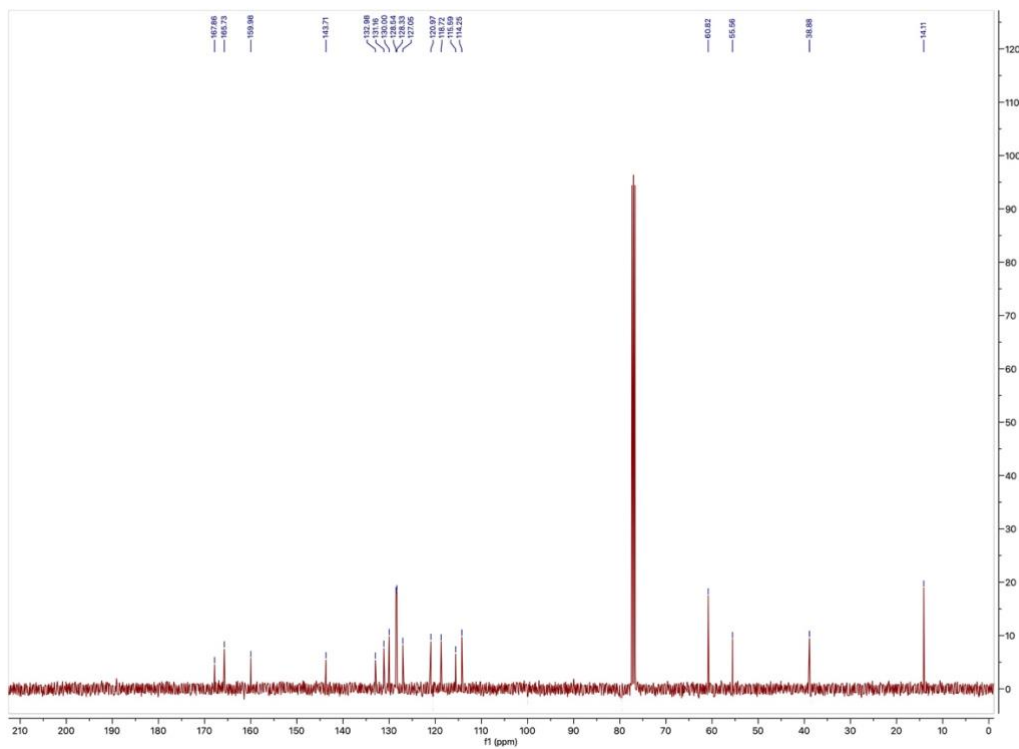

|         |        |    |                                                                                    |       |       |
|---------|--------|----|------------------------------------------------------------------------------------|-------|-------|
| UBCS396 | MC4182 | 3b | 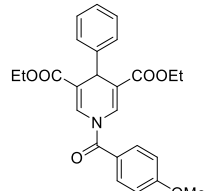 | 132°C | 17,9% |
|---------|--------|----|------------------------------------------------------------------------------------|-------|-------|

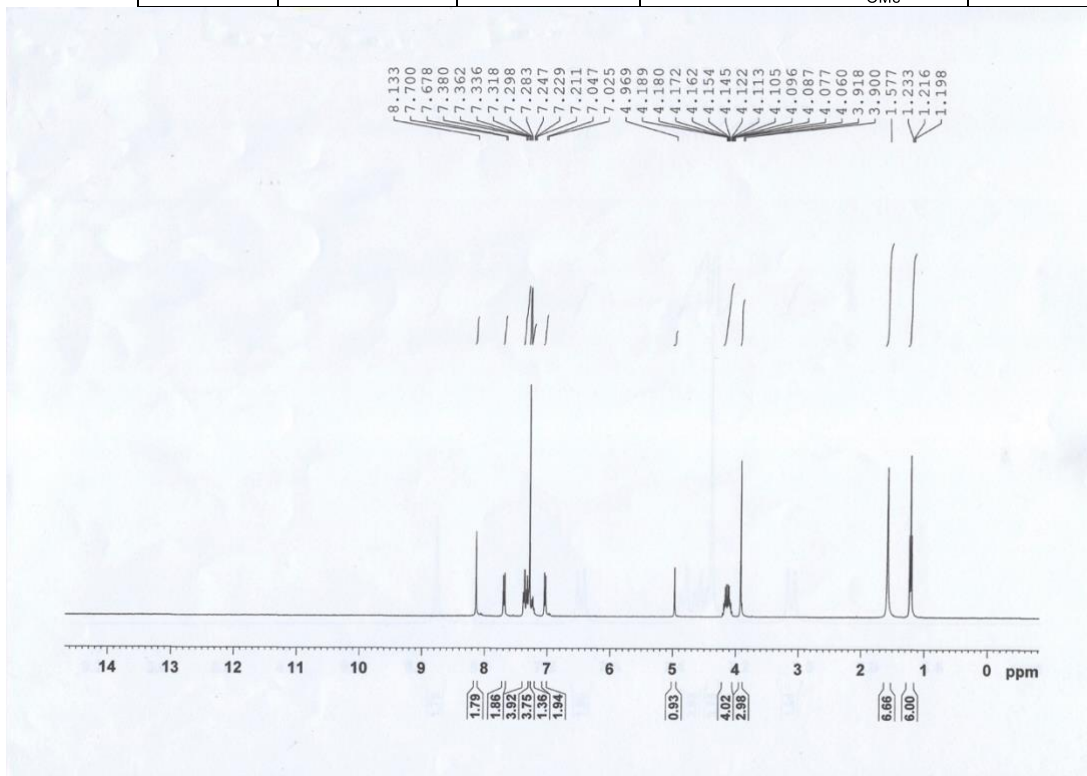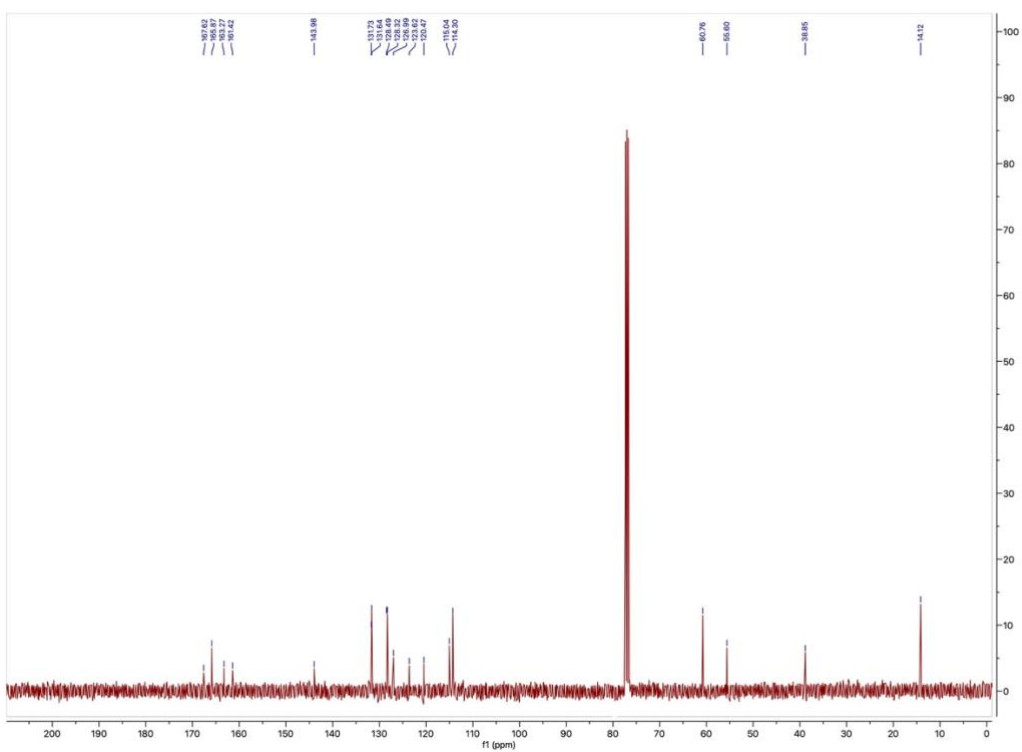

|                |               |           |                                                                                    |
|----------------|---------------|-----------|------------------------------------------------------------------------------------|
| <b>UBCS398</b> | <b>MC4175</b> | <b>3c</b> | 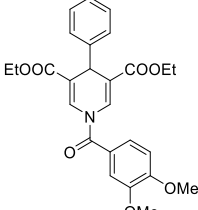 |
|----------------|---------------|-----------|------------------------------------------------------------------------------------|

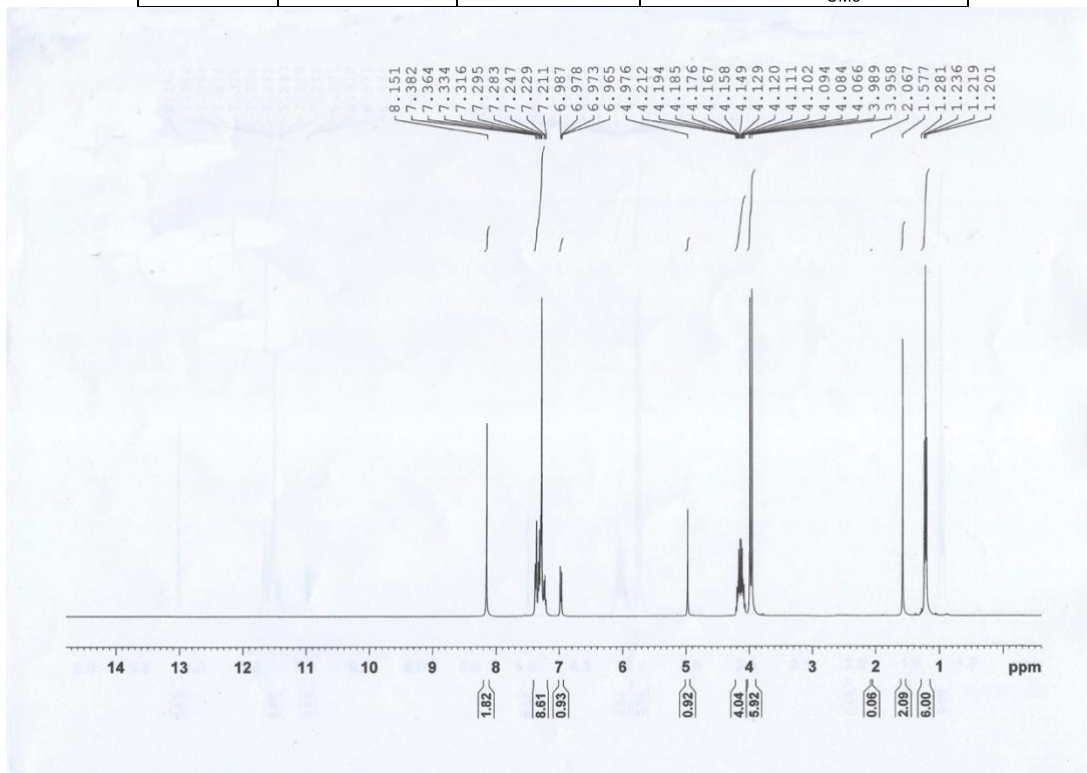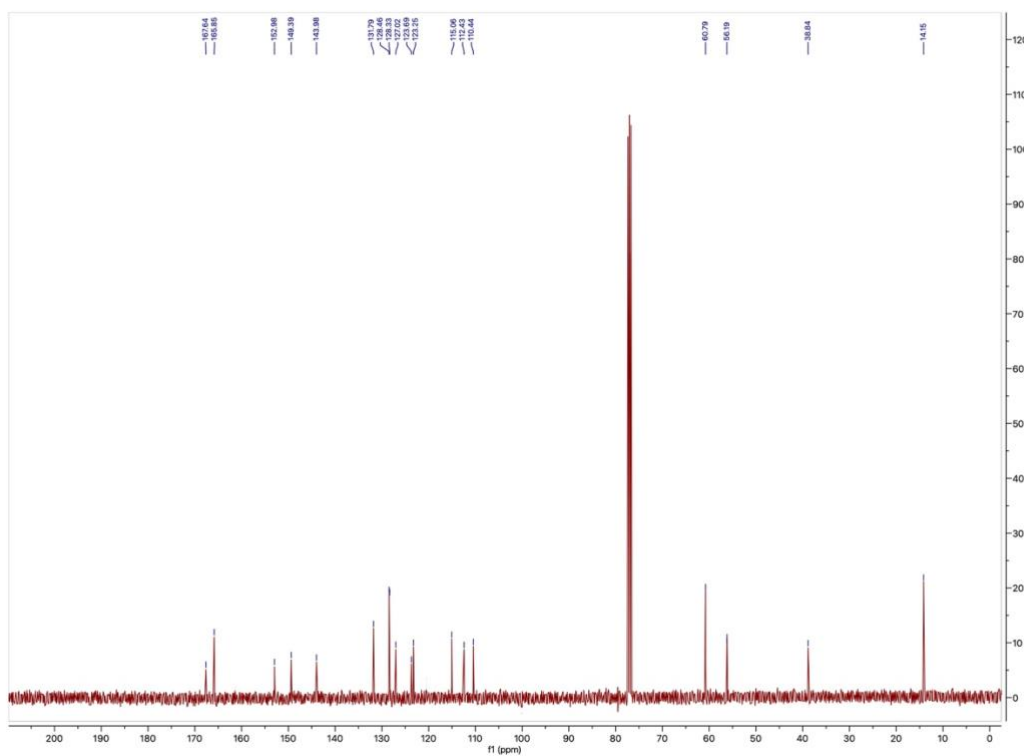

|         |        |    |                                                                                    |       |        |
|---------|--------|----|------------------------------------------------------------------------------------|-------|--------|
| UBCS397 | MC4176 | 3d | 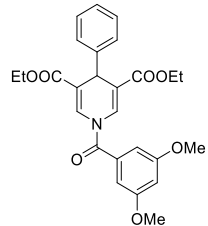 | 159°C | 64, 3% |
|---------|--------|----|------------------------------------------------------------------------------------|-------|--------|

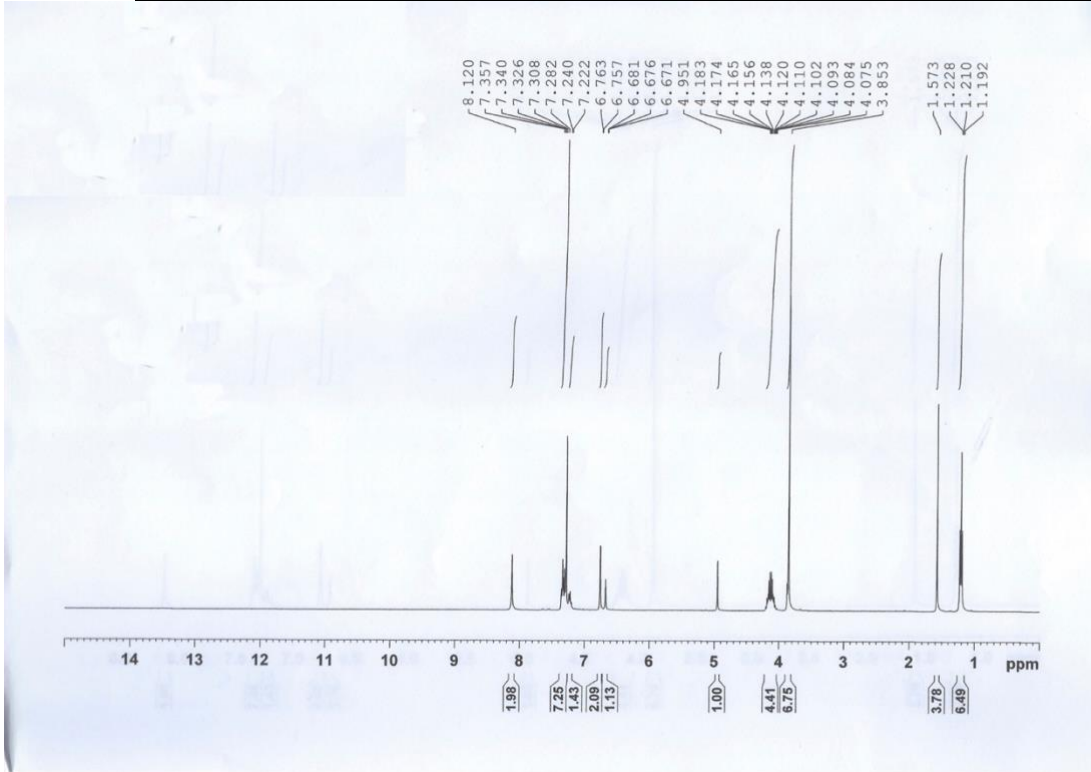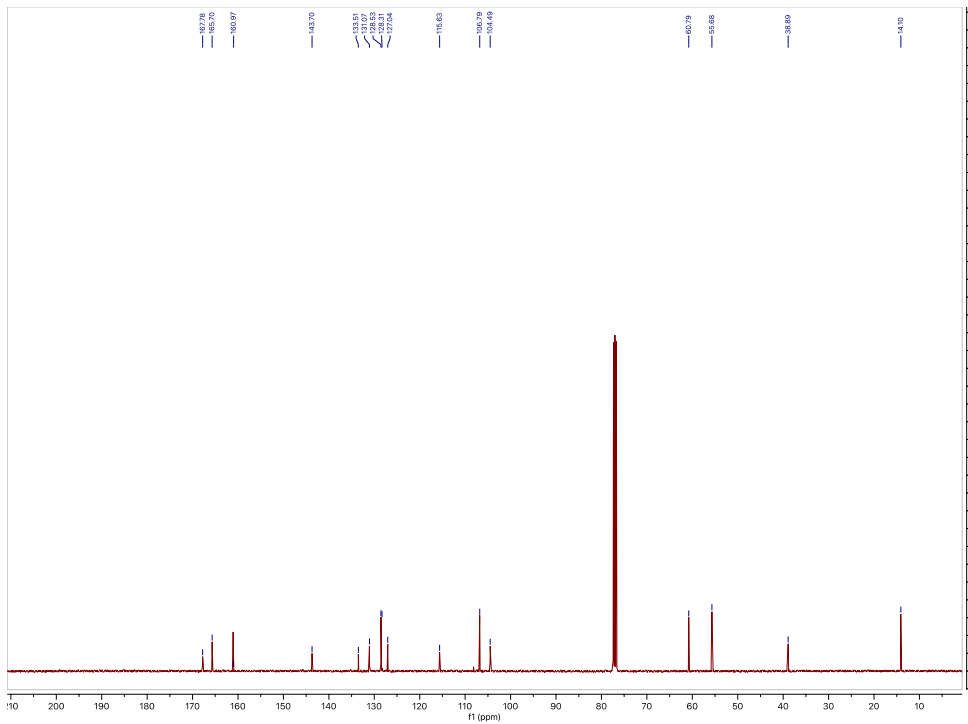

# IR spectra and HPLC traces of final compounds 2a-n and 3a-d and high resolution mass spectra for final compounds 3a-d

## 2a MC4199

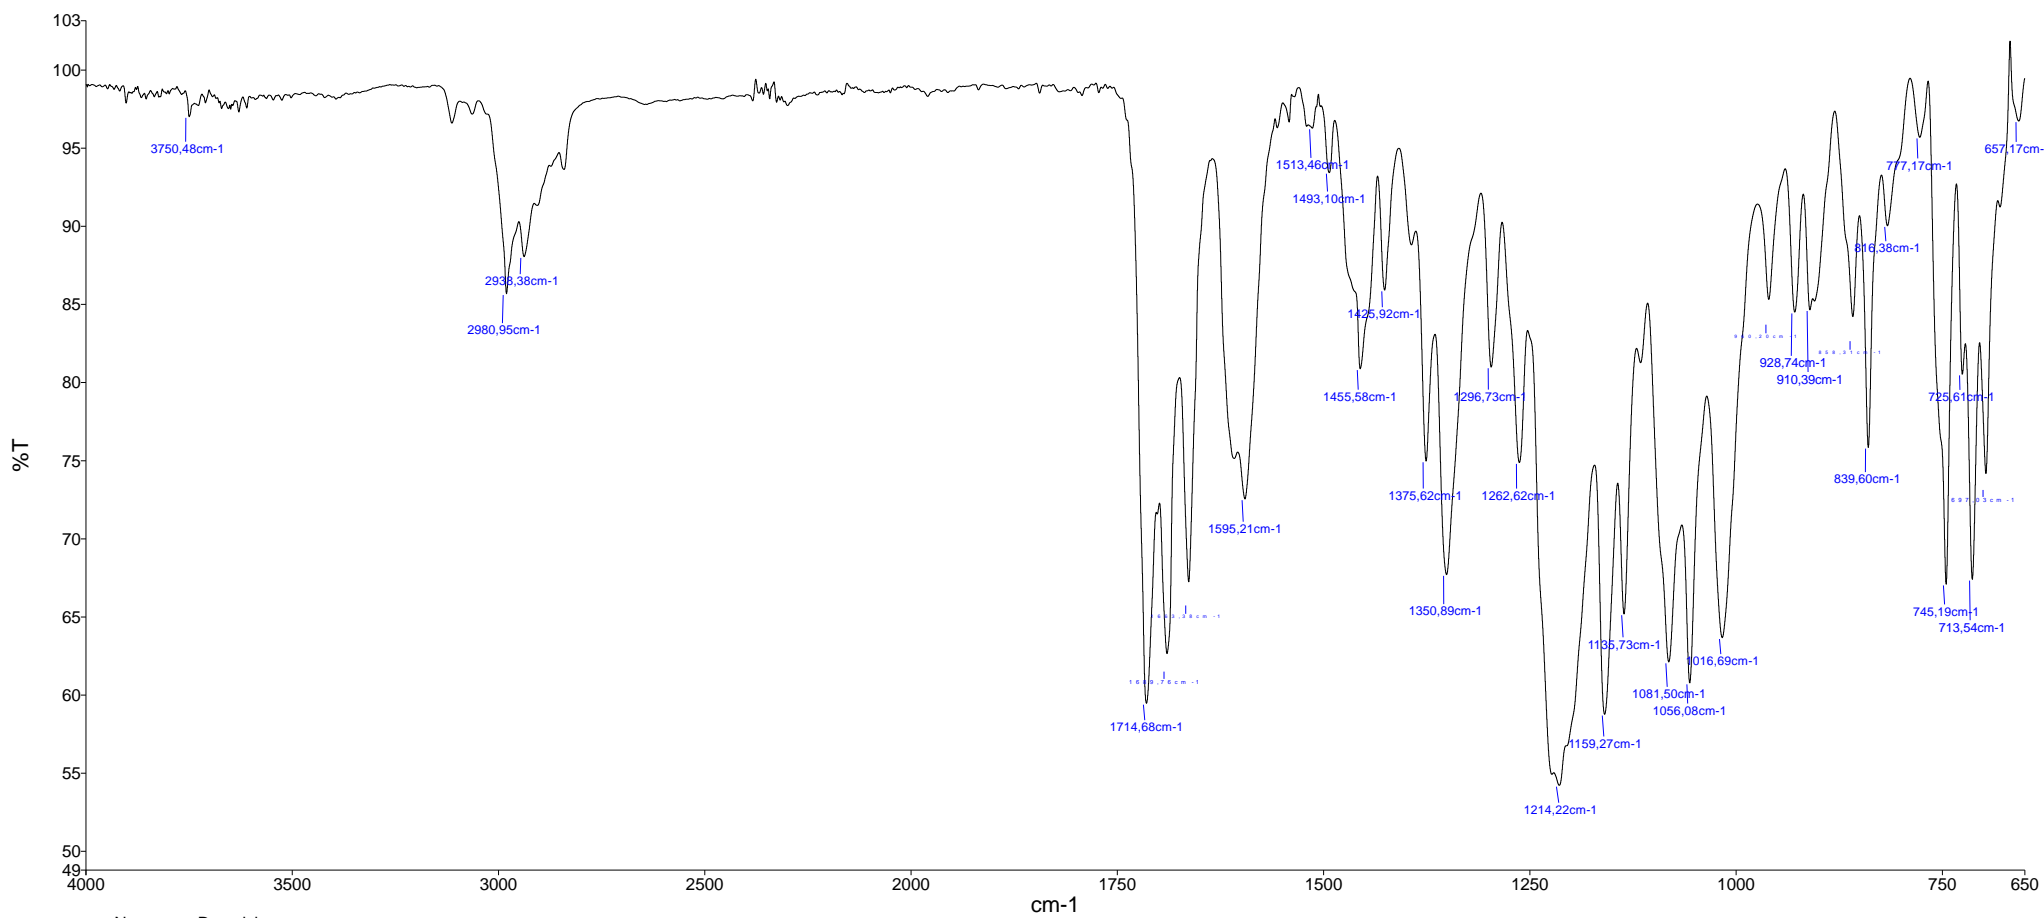

Nome Descrizione  
MC4199\_1



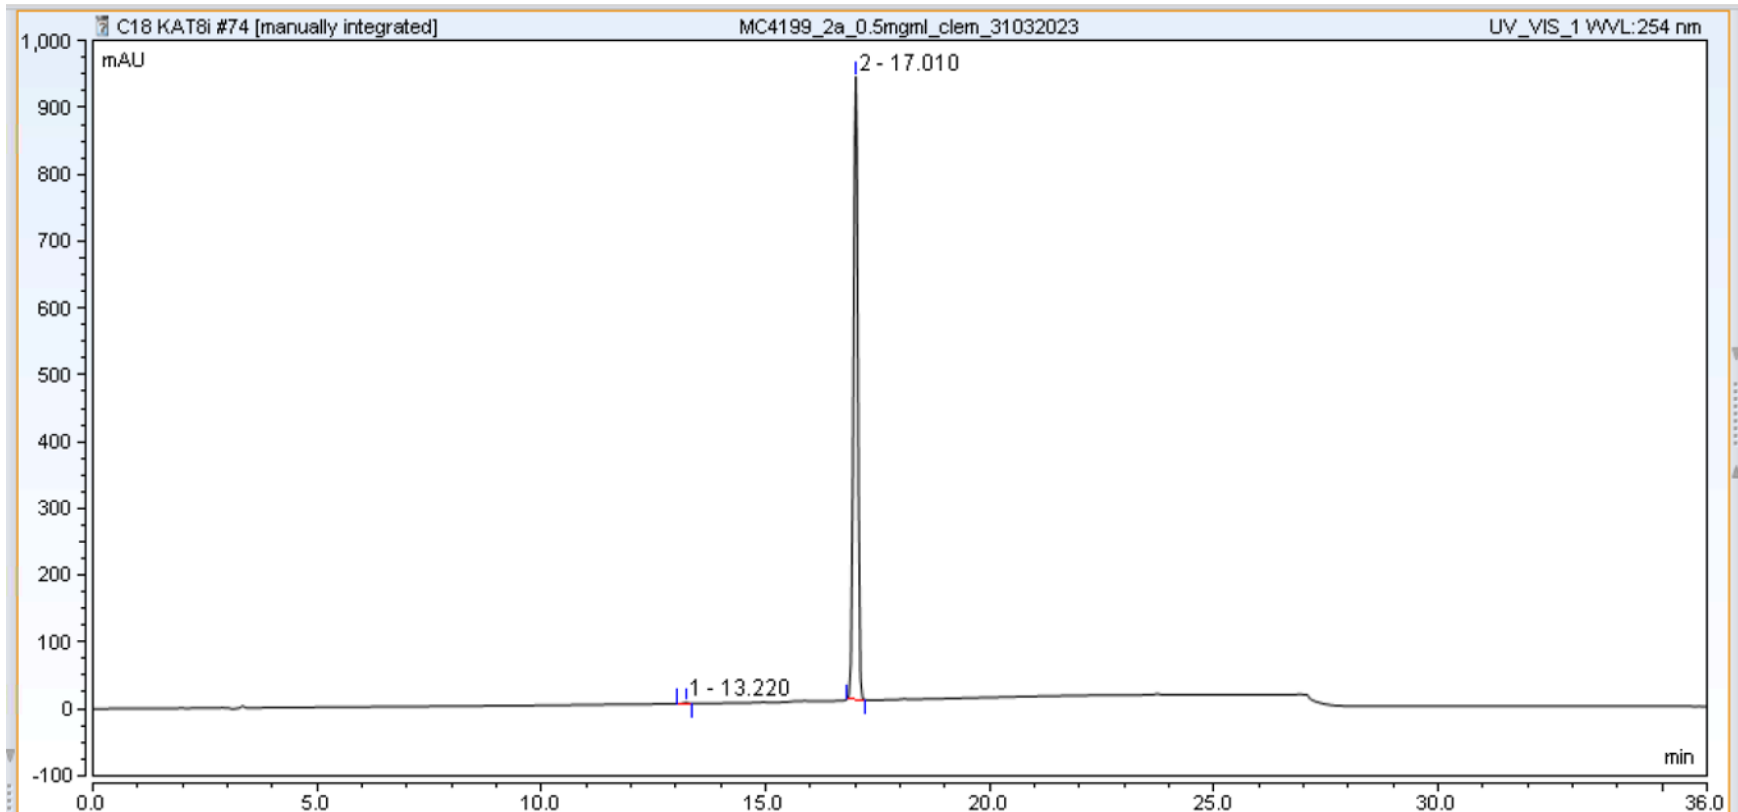

|   | A        | B            | C      | D          | E            | F          | G    | H               | I        | J         | K         |
|---|----------|--------------|--------|------------|--------------|------------|------|-----------------|----------|-----------|-----------|
| 1 | Peak No. | Ret.Time min | Amount | Rel.Area % | Area mAU*min | Height mAU | Type | Width (50% min) | Asym. EP | Resol. EP | Plates EP |
| 4 | 1        | 13.220       | n.a.   | 0.18       | 0.1865       | 1.70       | BMB  | 0.103           | 0.91     | 21.53     | 91718     |
| 5 | 2        | 17.010       | n.a.   | 99.82      | 104.0530     | 932.86     | BMB* | 0.105           | 0.94     | n.a.      | 145478    |
| 6 | Maximum  |              | 0.0000 | 99.82      | 104.0530     | 932.86     |      | 0.105           | 0.94     | 21.53     | 145478    |
| 7 | Minimum  |              | 0.0000 | 0.18       | 0.1865       | 1.70       |      | 0.103           | 0.91     | 21.53     | 91718     |
| 8 | Sum      |              | 0.0000 | 100.00     | 104.2396     | 934.56     |      |                 |          |           |           |
| 9 |          |              |        |            |              |            |      |                 |          |           |           |

# 2b MC4158

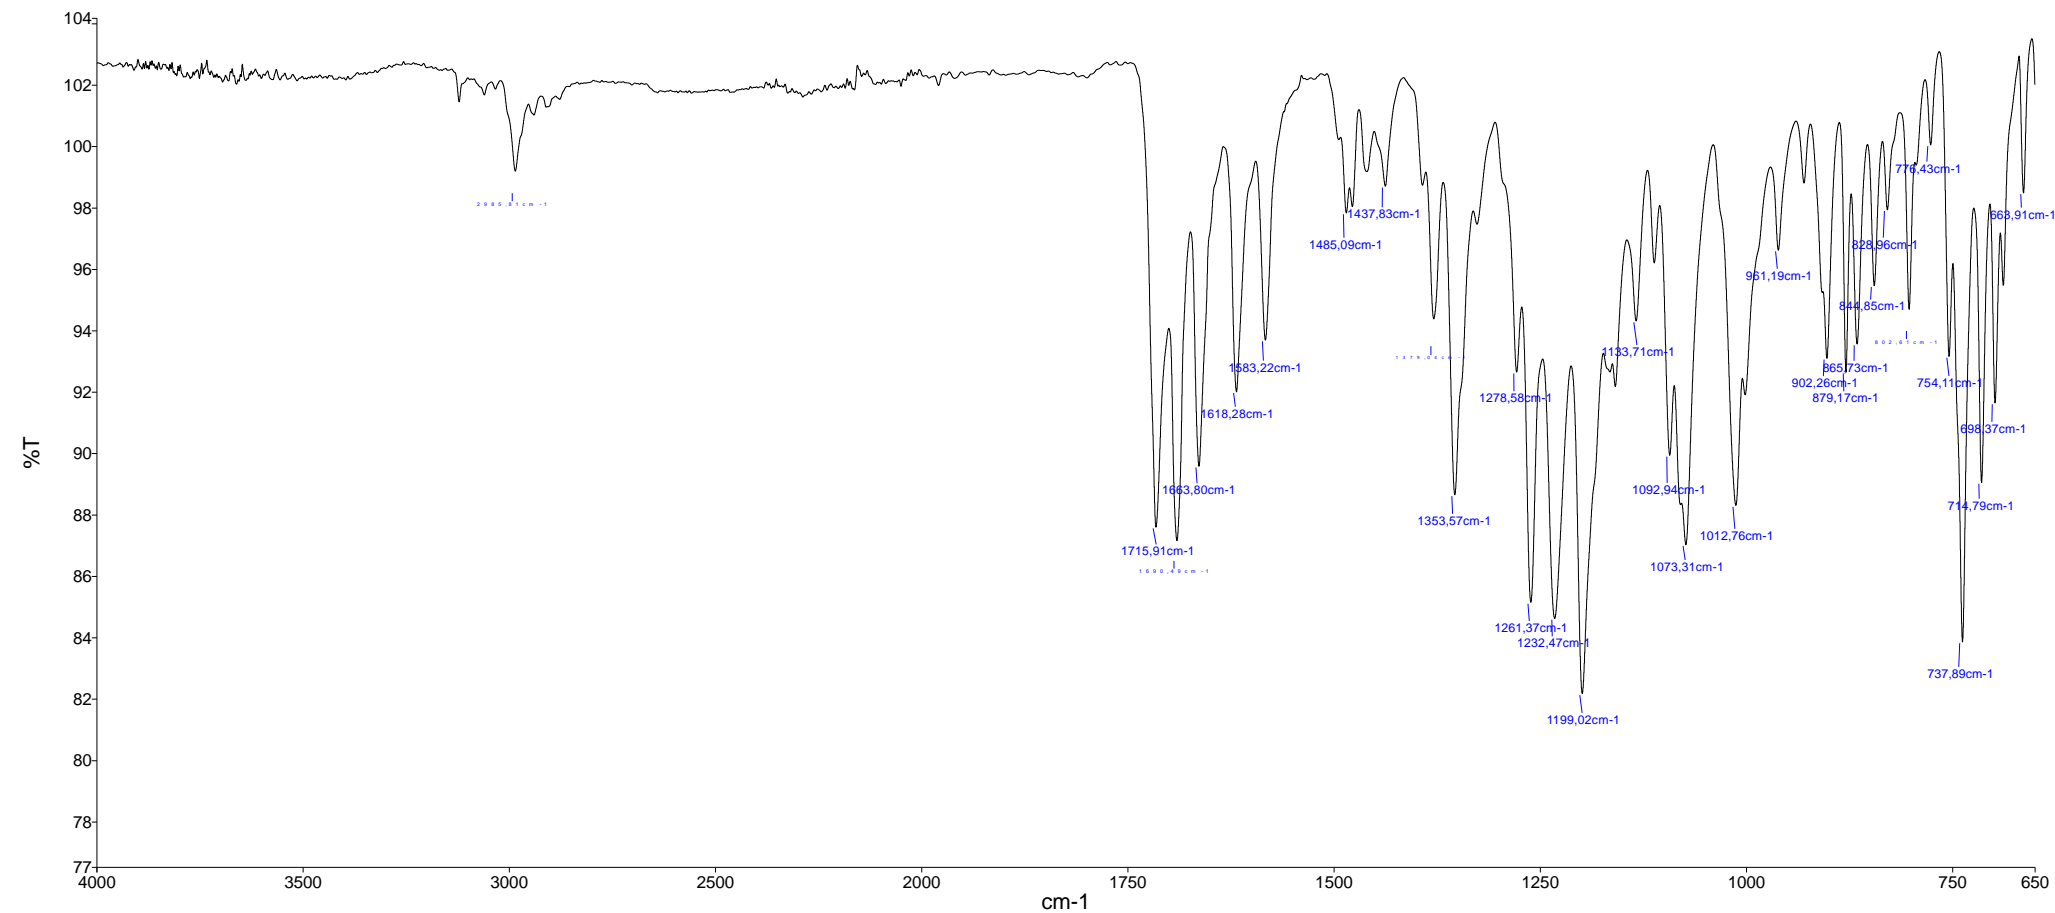

Nome Descrizione  
MC4158\_1

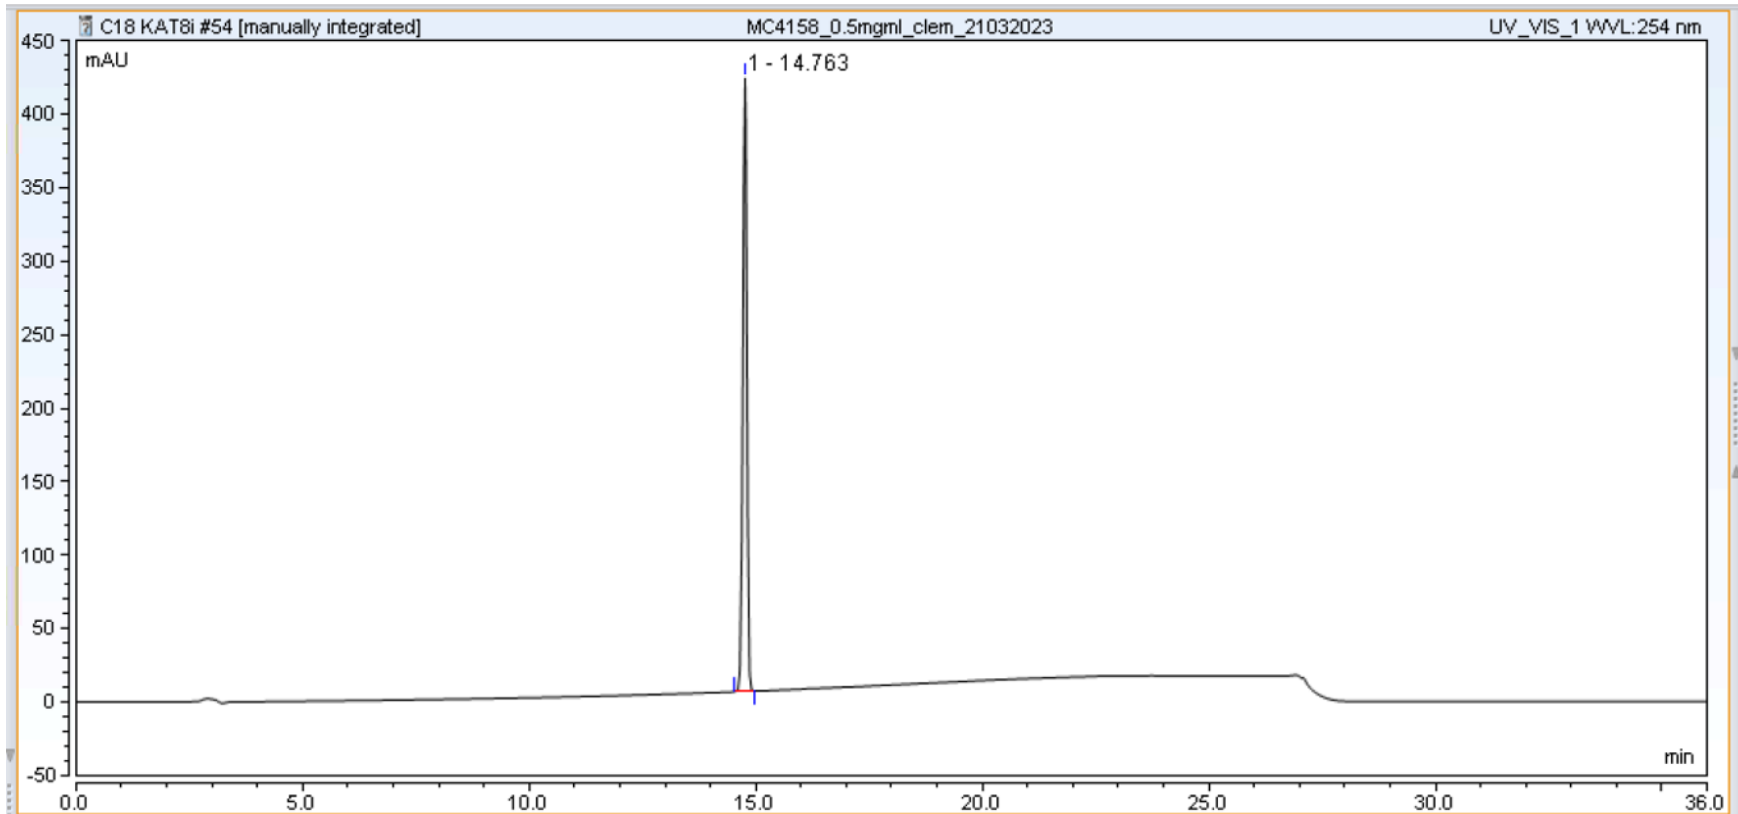

|   | A       | B        | C      | D        | E       | F      | G    | H          | I     | J      | K      |
|---|---------|----------|--------|----------|---------|--------|------|------------|-------|--------|--------|
| 1 | Peak    | Ret.Time | Amount | Rel.Area | Area    | Height | Type | Width (50% | Asym. | Resol. | Plates |
| 2 | No.     | min      | n.a.   | %        | mAU*min | mAU    |      | min        | EP    | EP     | EP     |
| 4 | 1       | 14.763   | n.a.   | 100.00   | 42.6207 | 417.36 | BMB* | 0.095      | 0.92  | n.a.   | 133470 |
| 6 | Maximum |          | 0.0000 | 100.00   | 42.6207 | 417.36 |      | 0.095      | 0.92  | 0.00   | 133470 |
| 7 | Minimum |          | 0.0000 | 100.00   | 42.6207 | 417.36 |      | 0.095      | 0.92  | 0.00   | 133470 |
| 8 | Sum     |          | 0.0000 | 100.00   | 42.6207 | 417.36 |      |            |       |        |        |
| 9 |         |          |        |          |         |        |      |            |       |        |        |

# 2c MC4168

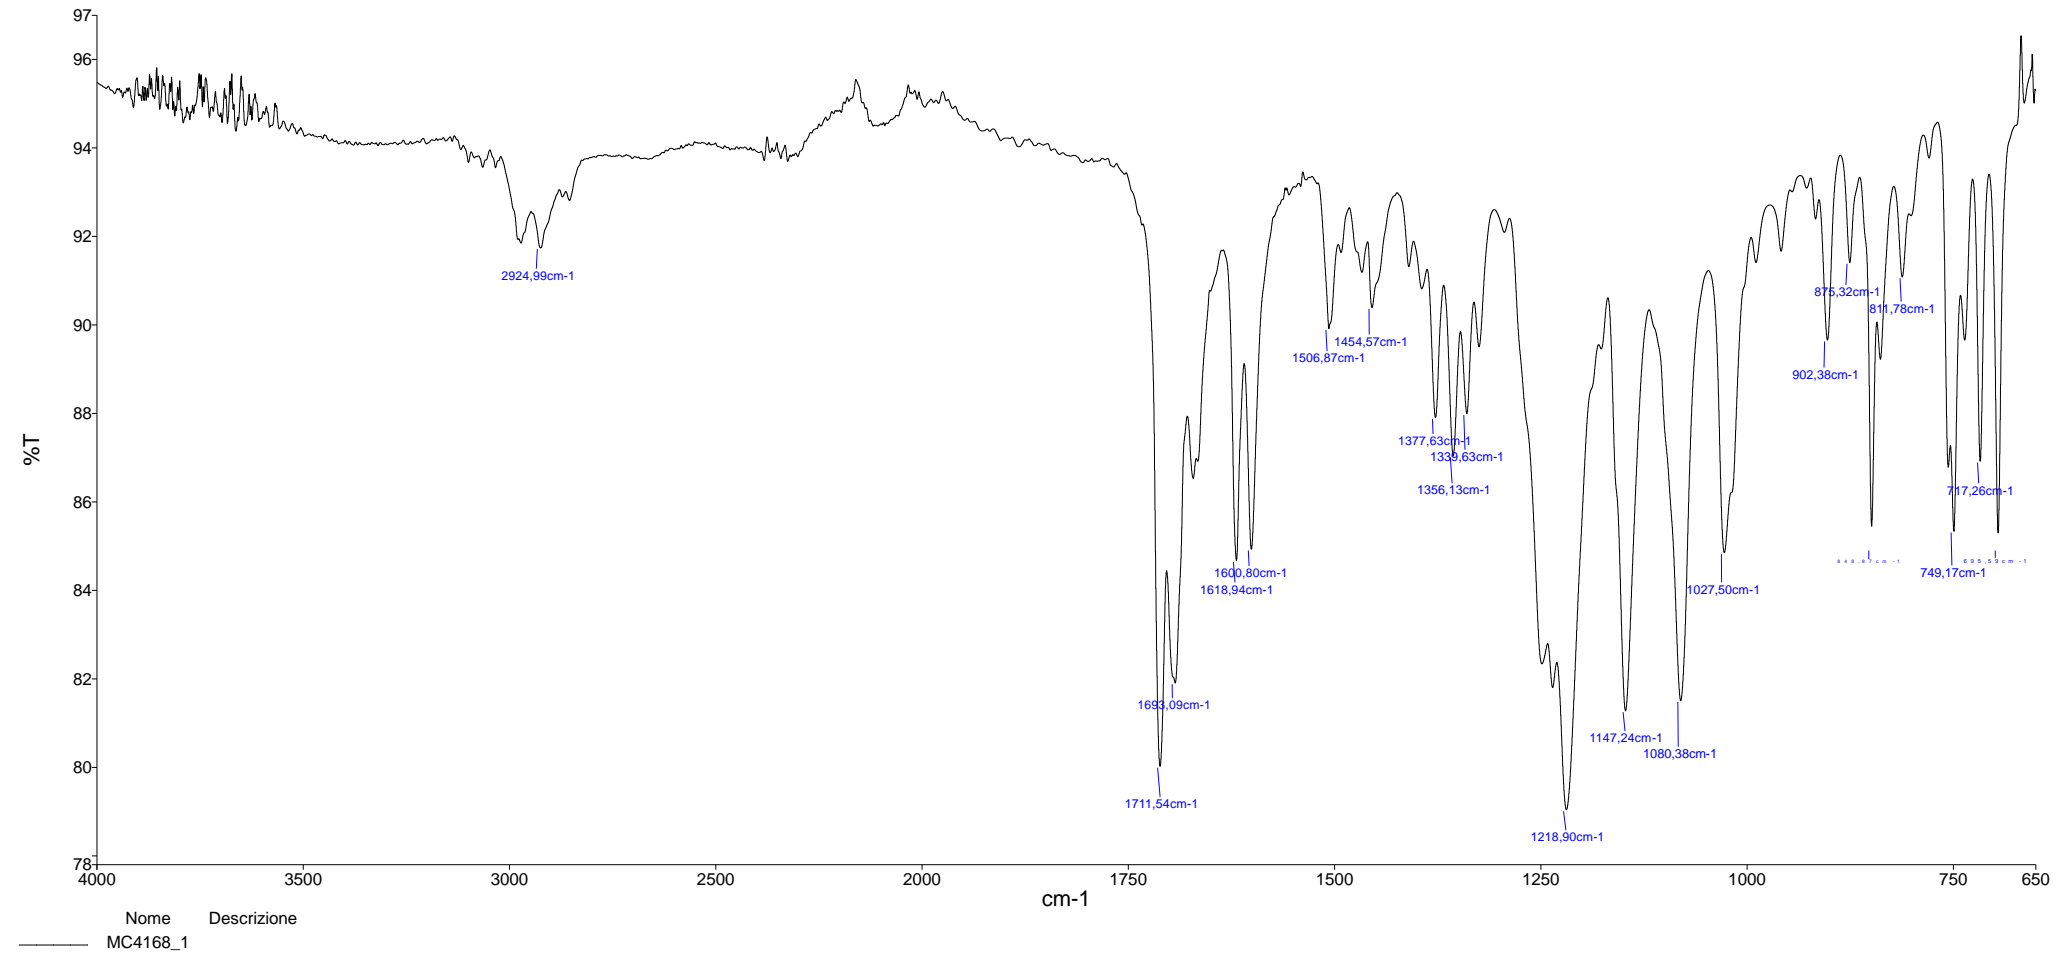

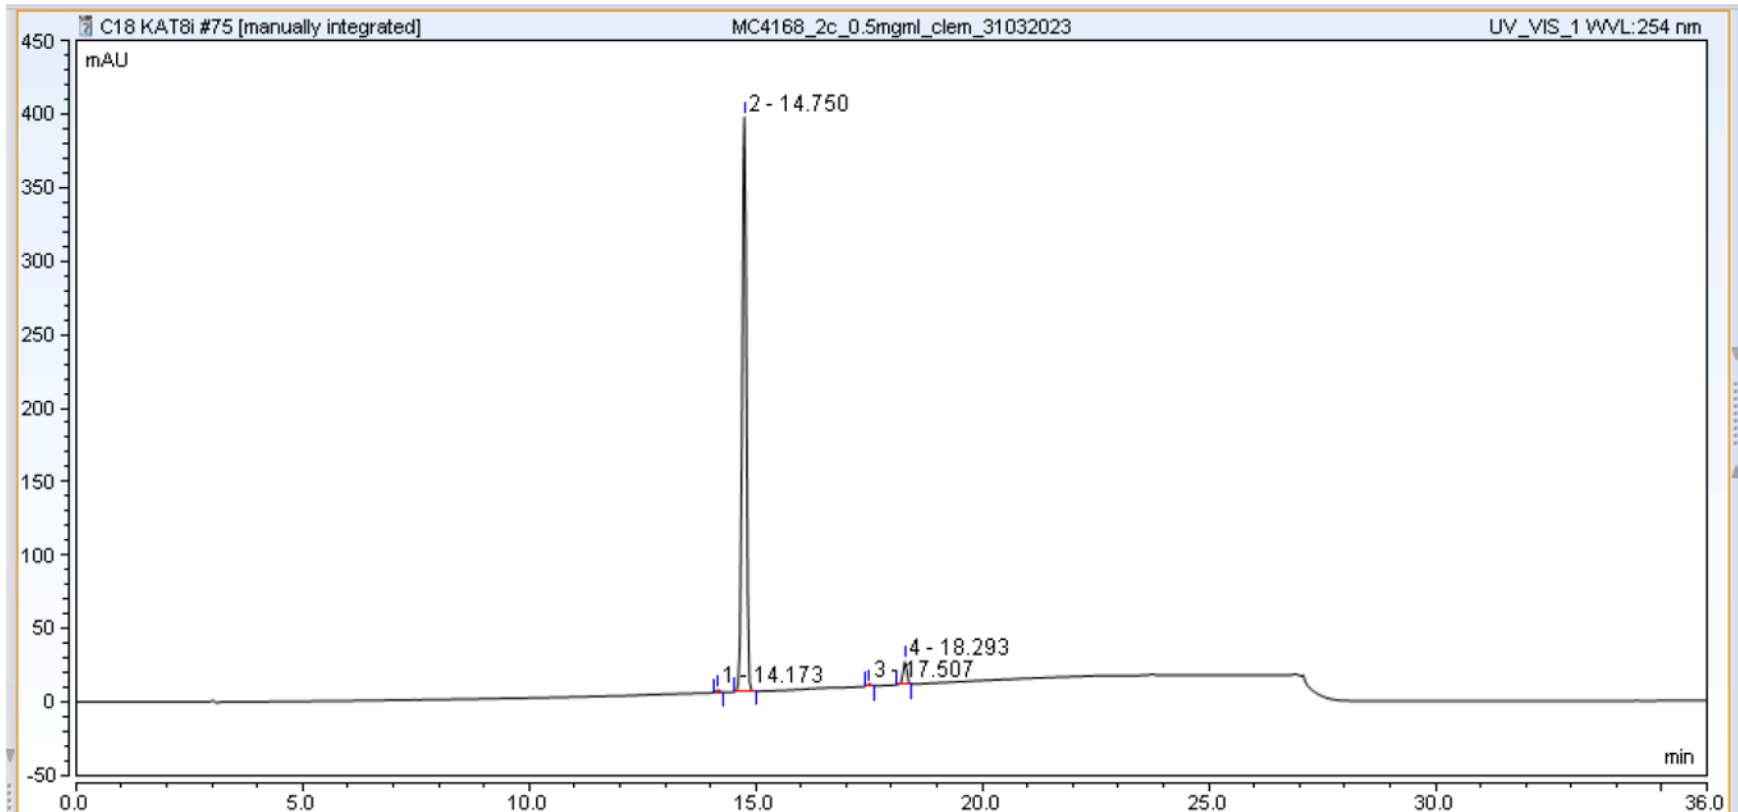

|    | A       | B        | C      | D        | E       | F      | G    | H          | I     | J      | K      |
|----|---------|----------|--------|----------|---------|--------|------|------------|-------|--------|--------|
| 1  | Peak    | Ret.Time | Amount | Rel.Area | Area    | Height | Type | Width (50% | Asym. | Resol. | Plates |
| 2  | No.     | min      | n.a.   | %        | mAU*min | mAU    |      | min        | EP    | EP     | EP     |
| 4  | 1       | 14.173   | n.a.   | 0.43     | 0.1898  | 1.98   | BMB* | 0.094      | 0.92  | 3.51   | 126697 |
| 5  | 2       | 14.750   | n.a.   | 95.72    | 41.7944 | 391.18 | BMB* | 0.100      | 0.92  | 17.07  | 120452 |
| 6  | 3       | 17.507   | n.a.   | 0.34     | 0.1483  | 1.57   | BMB* | 0.091      | 0.94  | 5.13   | 207287 |
| 7  | 4       | 18.293   | n.a.   | 3.51     | 1.5306  | 15.88  | BMB* | 0.090      | 0.96  | n.a.   | 227374 |
| 8  | Maximum |          | 0.0000 | 95.72    | 41.7944 | 391.18 |      | 0.100      | 0.96  | 17.07  | 227374 |
| 9  | Minimum |          | 0.0000 | 0.34     | 0.1483  | 1.57   |      | 0.090      | 0.92  | 3.51   | 120452 |
| 10 | Sum     |          | 0.0000 | 100.00   | 43.6631 | 410.61 |      |            |       |        |        |
| 11 |         |          |        |          |         |        |      |            |       |        |        |

# 2d MC4172

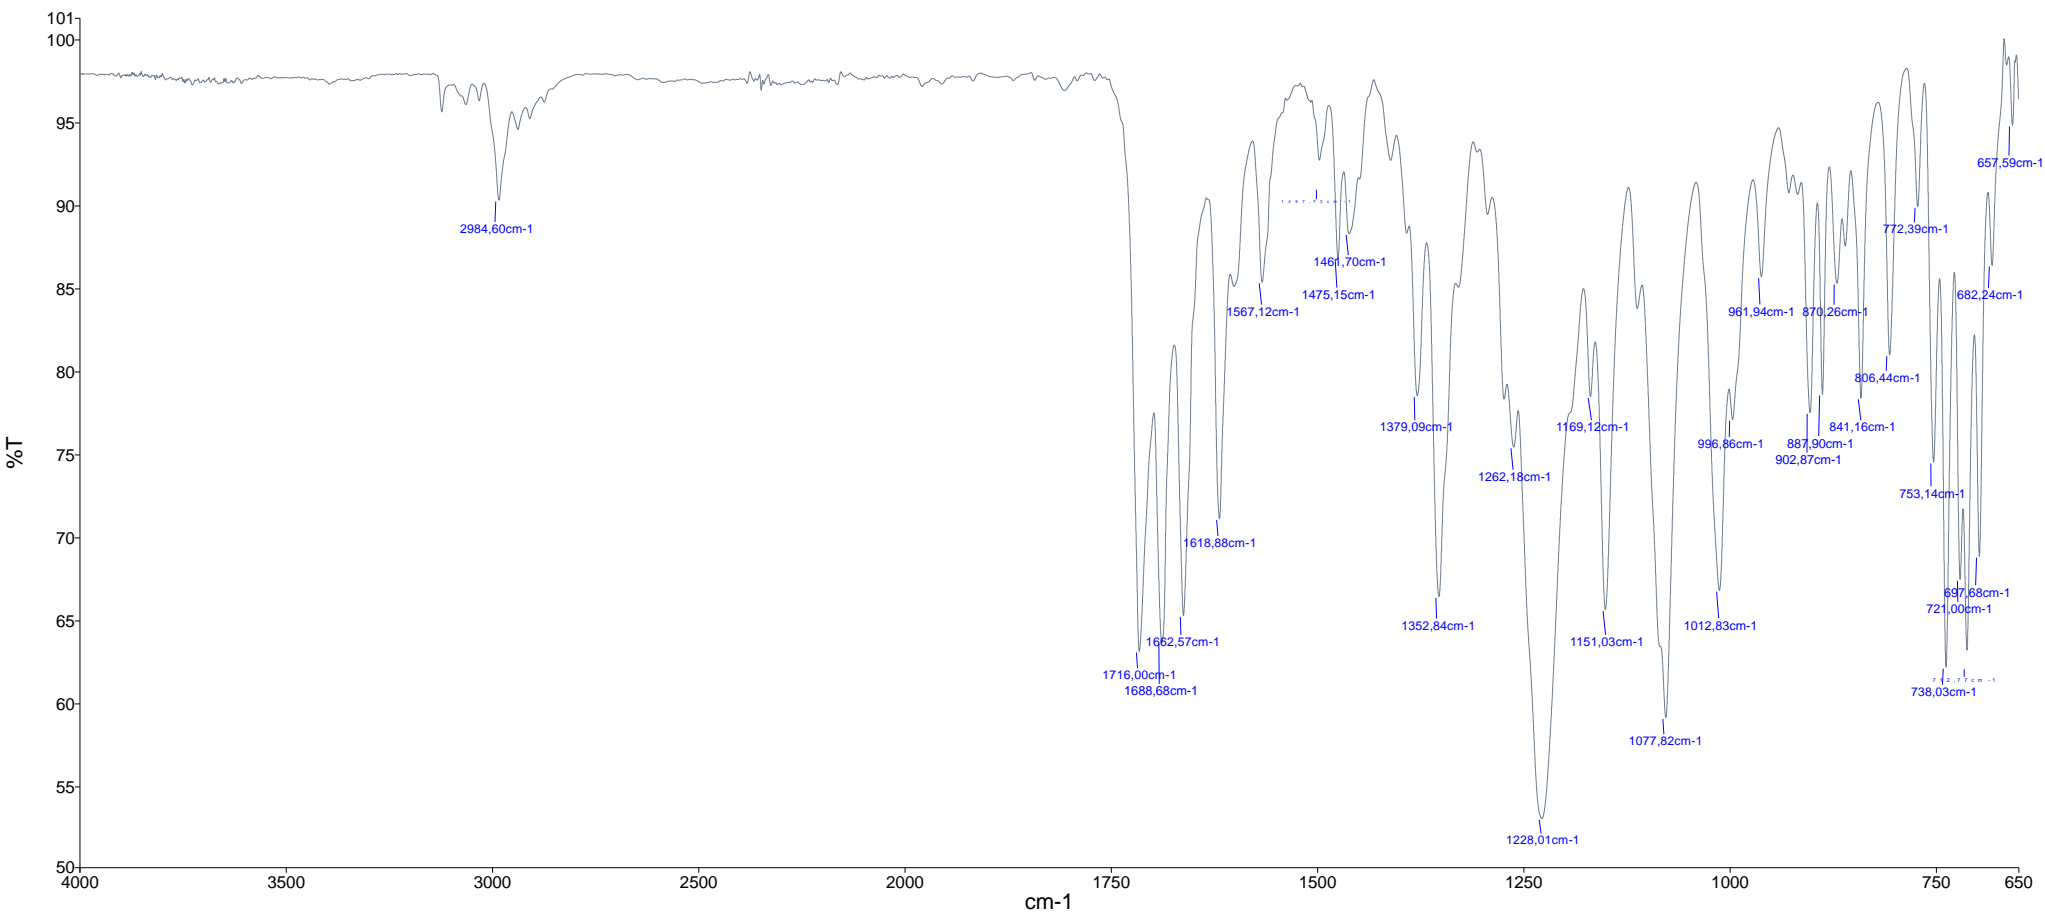

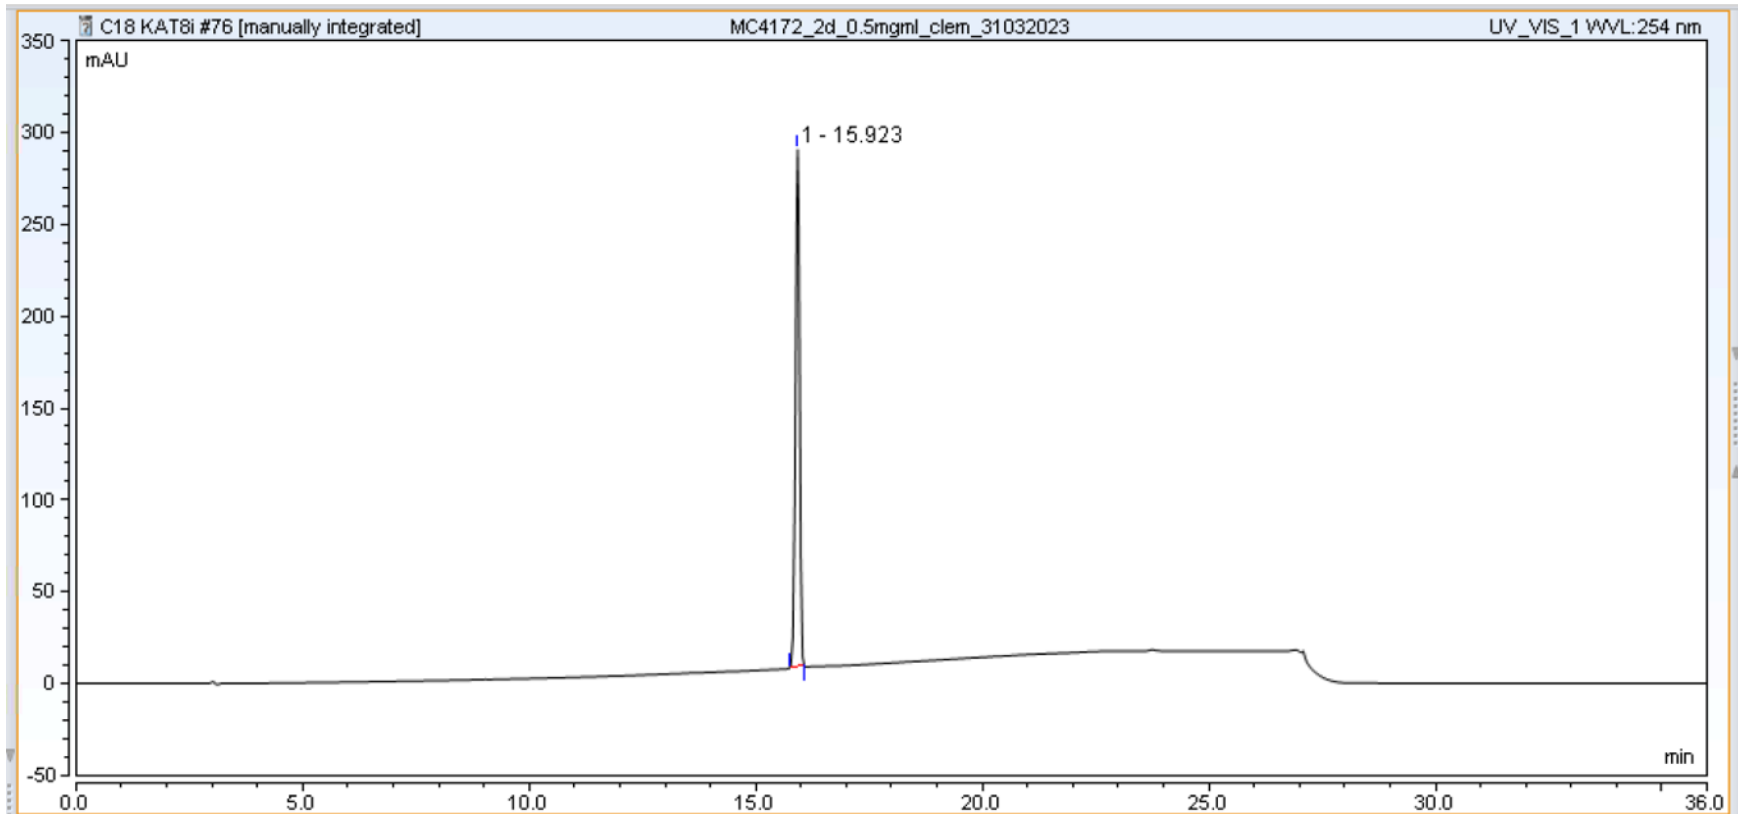

|   | A       | B        | C      | D        | E       | F      | G    | H          | I     | J      | K      |
|---|---------|----------|--------|----------|---------|--------|------|------------|-------|--------|--------|
| 1 | Peak    | Ret.Time | Amount | Rel.Area | Area    | Height | Type | Width (50% | Asym. | Resol. | Plates |
| 2 | No.     | min      | n.a.   | %        | mAU*min | mAU    |      | min        | EP    | EP     | EP     |
| 4 | 1       | 15.923   | n.a.   | 100.00   | 29.6950 | 281.30 | BMB* | 0.099      | 0.93  | n.a.   | 142353 |
| 6 | Maximum |          | 0.0000 | 100.00   | 29.6950 | 281.30 |      | 0.099      | 0.93  | 0.00   | 142353 |
| 7 | Minimum |          | 0.0000 | 100.00   | 29.6950 | 281.30 |      | 0.099      | 0.93  | 0.00   | 142353 |
| 8 | Sum     |          | 0.0000 | 100.00   | 29.6950 | 281.30 |      |            |       |        |        |
| 9 |         |          |        |          |         |        |      |            |       |        |        |

# 2e MC4166

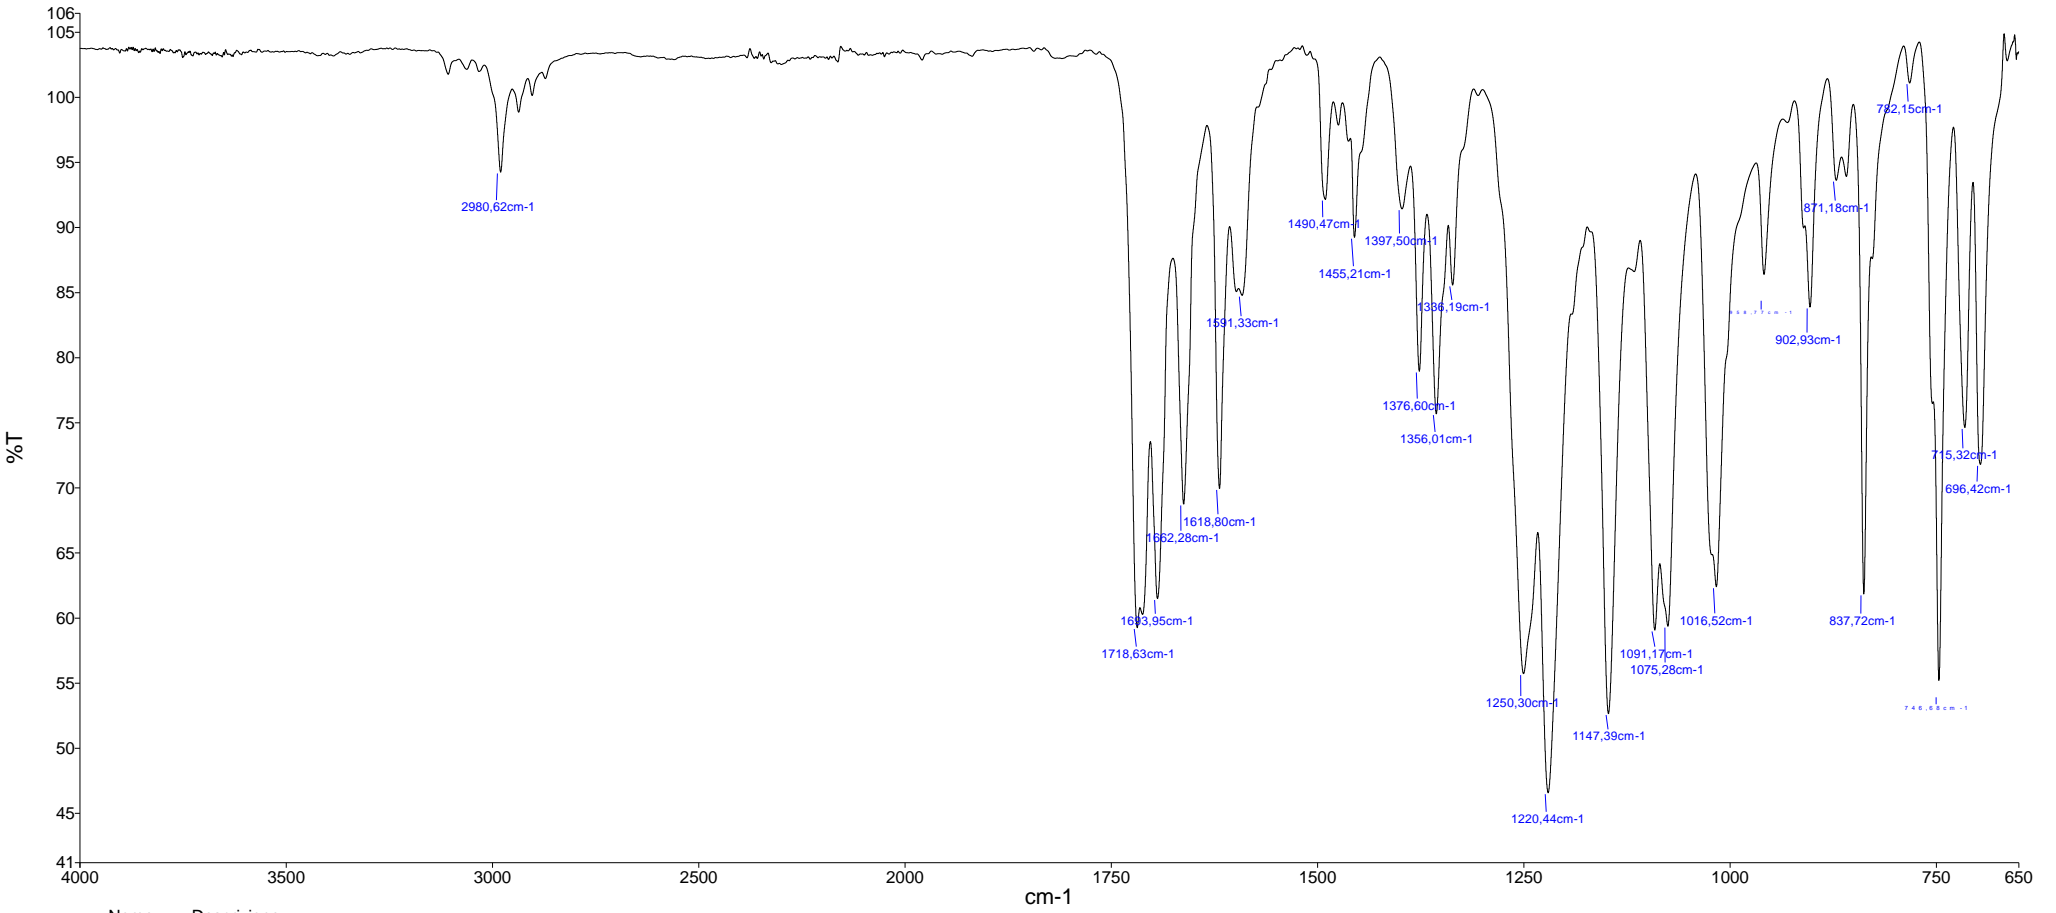



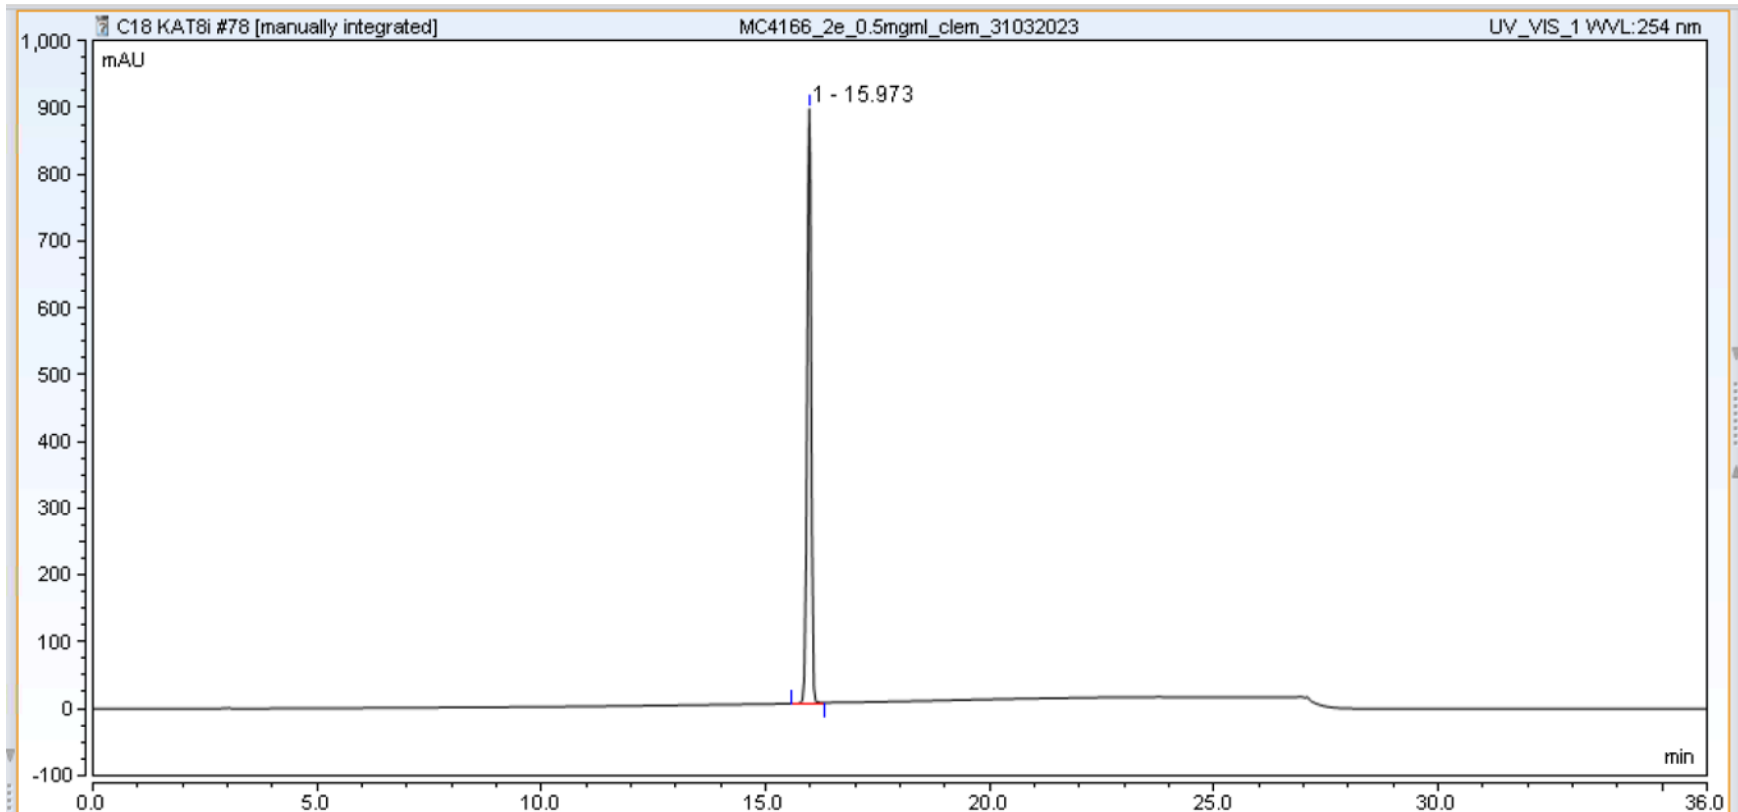

|   | A       | B        | C      | D        | E       | F      | G    | H          | I     | J      | K      |
|---|---------|----------|--------|----------|---------|--------|------|------------|-------|--------|--------|
| 1 | Peak    | Ret.Time | Amount | Rel.Area | Area    | Height | Type | Width (50% | Asym. | Resol. | Plates |
| 2 | No.     | min      | n.a.   | %        | mAU*min | mAU    |      | min        | EP    | EP     | EP     |
| 4 | 1       | 15.973   | n.a.   | 100.00   | 92.9384 | 890.43 | BM   | 0.097      | 0.92  | n.a.   | 150105 |
| 6 | Maximum |          | 0.0000 | 100.00   | 92.9384 | 890.43 |      | 0.097      | 0.92  | 0.00   | 150105 |
| 7 | Minimum |          | 0.0000 | 100.00   | 92.9384 | 890.43 |      | 0.097      | 0.92  | 0.00   | 150105 |
| 8 | Sum     |          | 0.0000 | 100.00   | 92.9384 | 890.43 |      |            |       |        |        |
| 9 |         |          |        |          |         |        |      |            |       |        |        |

# 2f MC4181

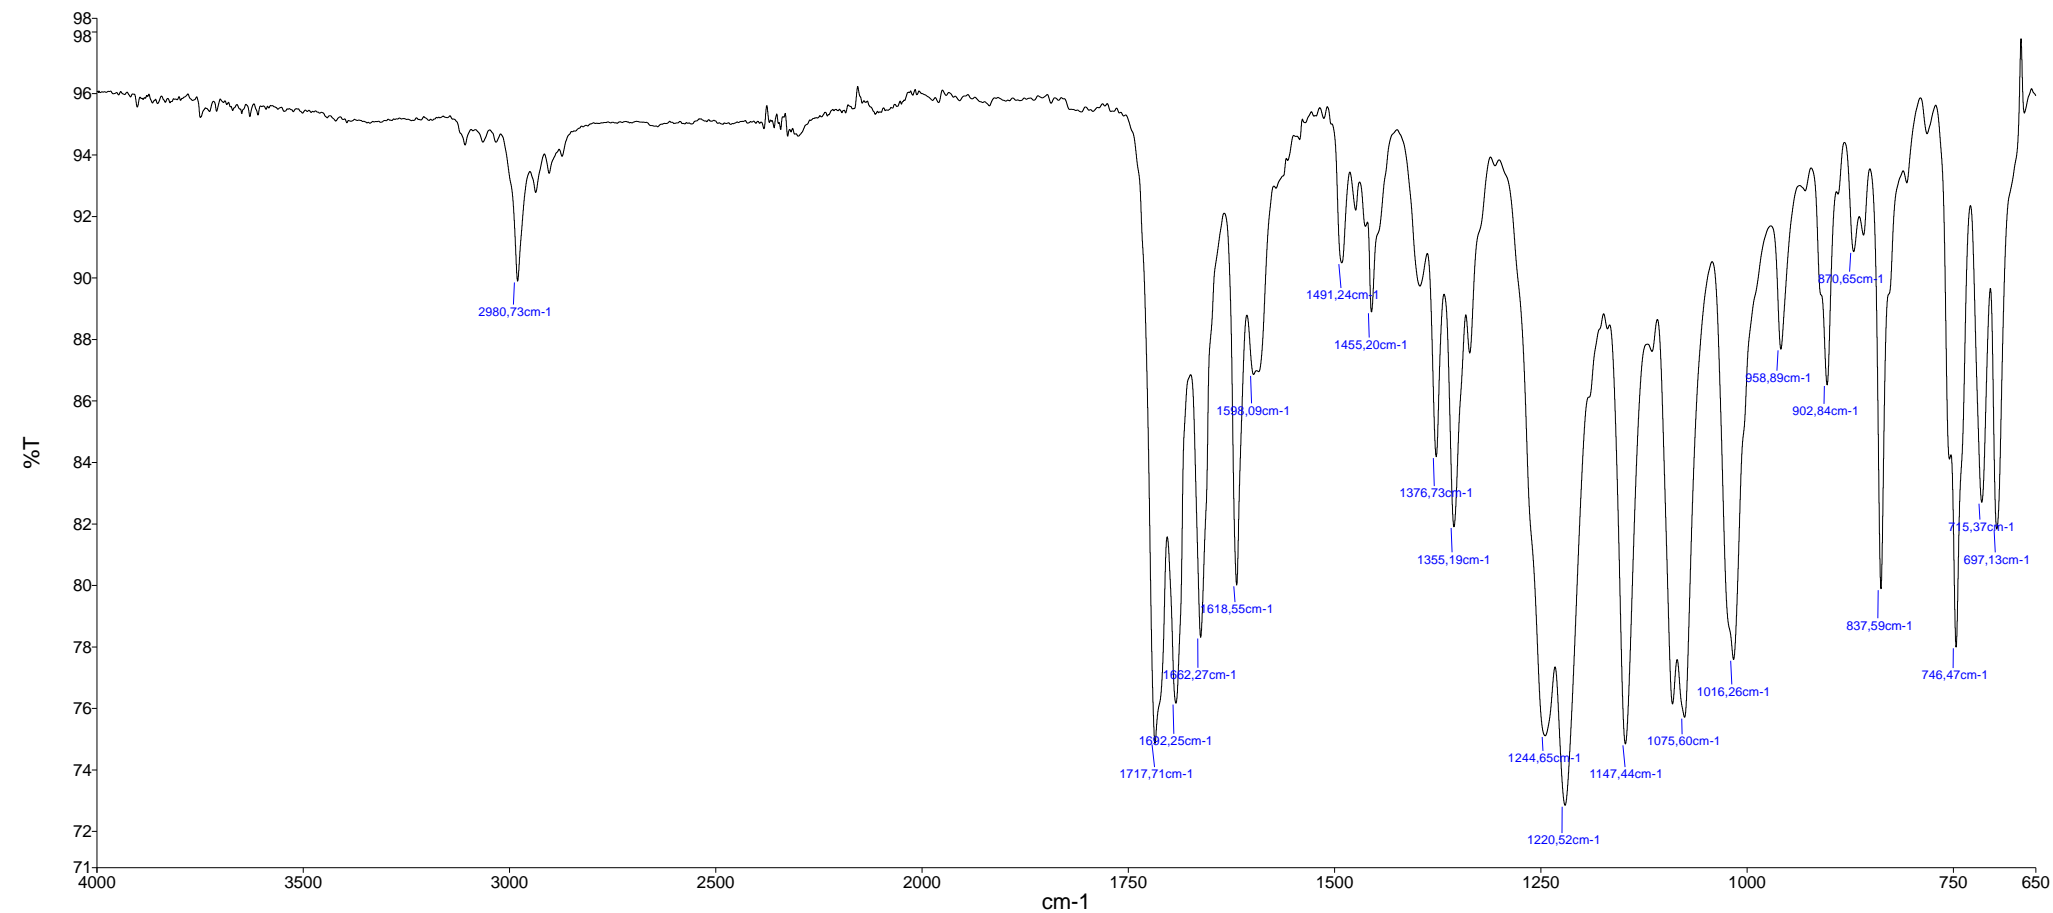

Nome Descrizione  
MC4181\_1

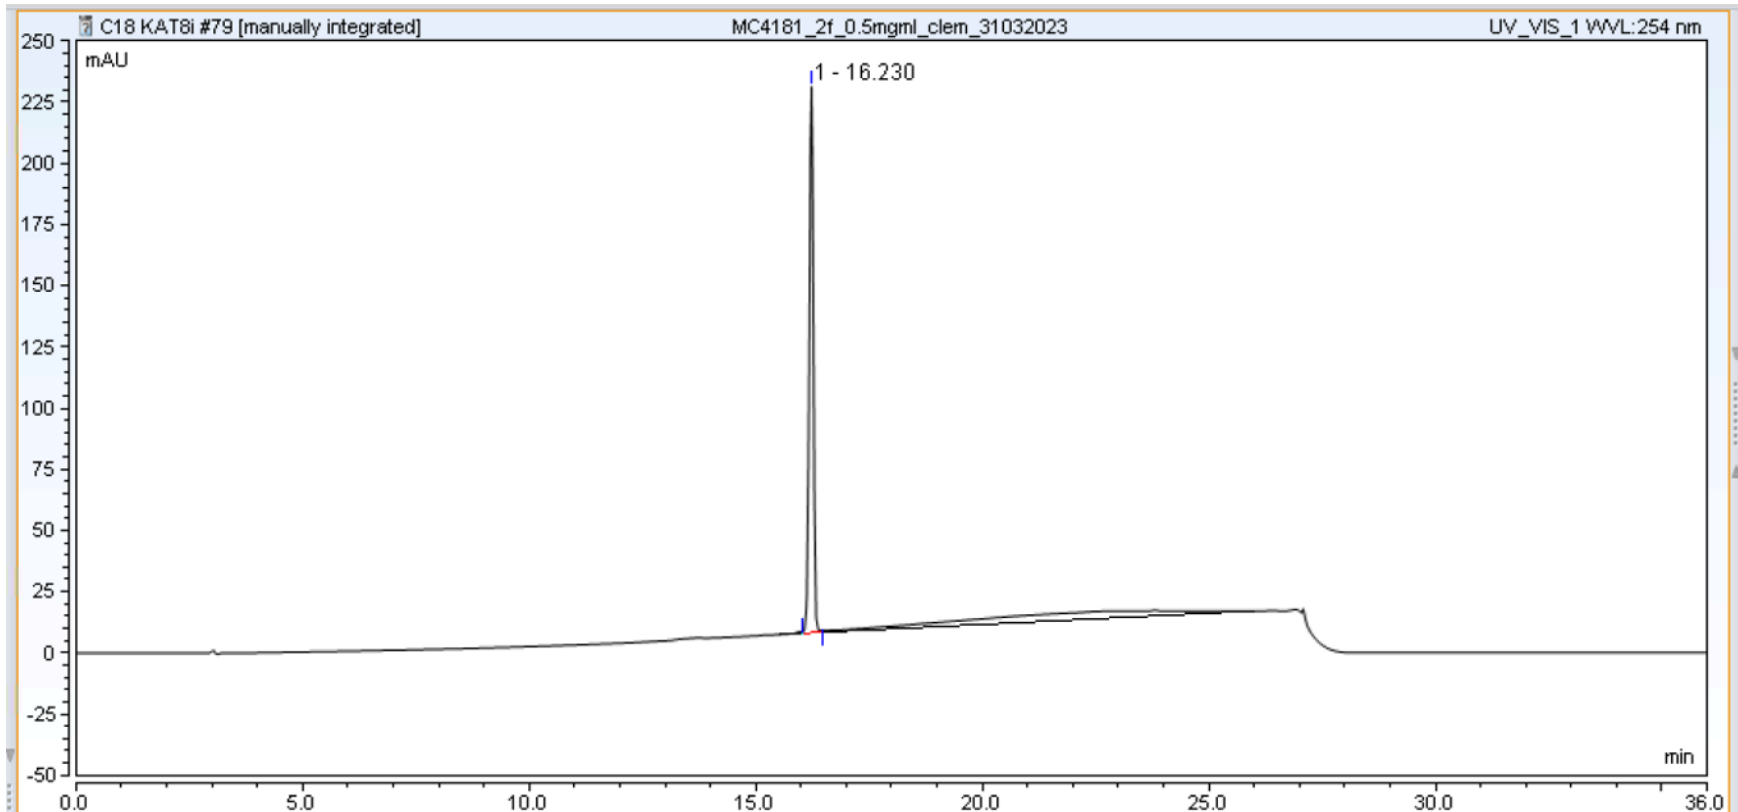

|   | A       | B        | C      | D        | E       | F      | G    | H          | I     | J      | K      |
|---|---------|----------|--------|----------|---------|--------|------|------------|-------|--------|--------|
| 1 | Peak    | Ret.Time | Amount | Rel.Area | Area    | Height | Type | Width (50% | Asym. | Resol. | Plates |
| 2 | No.     | min      | n.a.   | %        | mAU*min | mAU    |      | min        | EP    | EP     | EP     |
| 4 | 1       | 16.230   | n.a.   | 100.00   | 23.6146 | 223.14 | M    | 0.098      | 0.92  | n.a.   | 150911 |
| 6 | Maximum |          | 0.0000 | 100.00   | 23.6146 | 223.14 |      | 0.098      | 0.92  | 0.00   | 150911 |
| 7 | Minimum |          | 0.0000 | 100.00   | 23.6146 | 223.14 |      | 0.098      | 0.92  | 0.00   | 150911 |
| 8 | Sum     |          | 0.0000 | 100.00   | 23.6146 | 223.14 |      |            |       |        |        |
| 9 |         |          |        |          |         |        |      |            |       |        |        |

# 2g MC4185

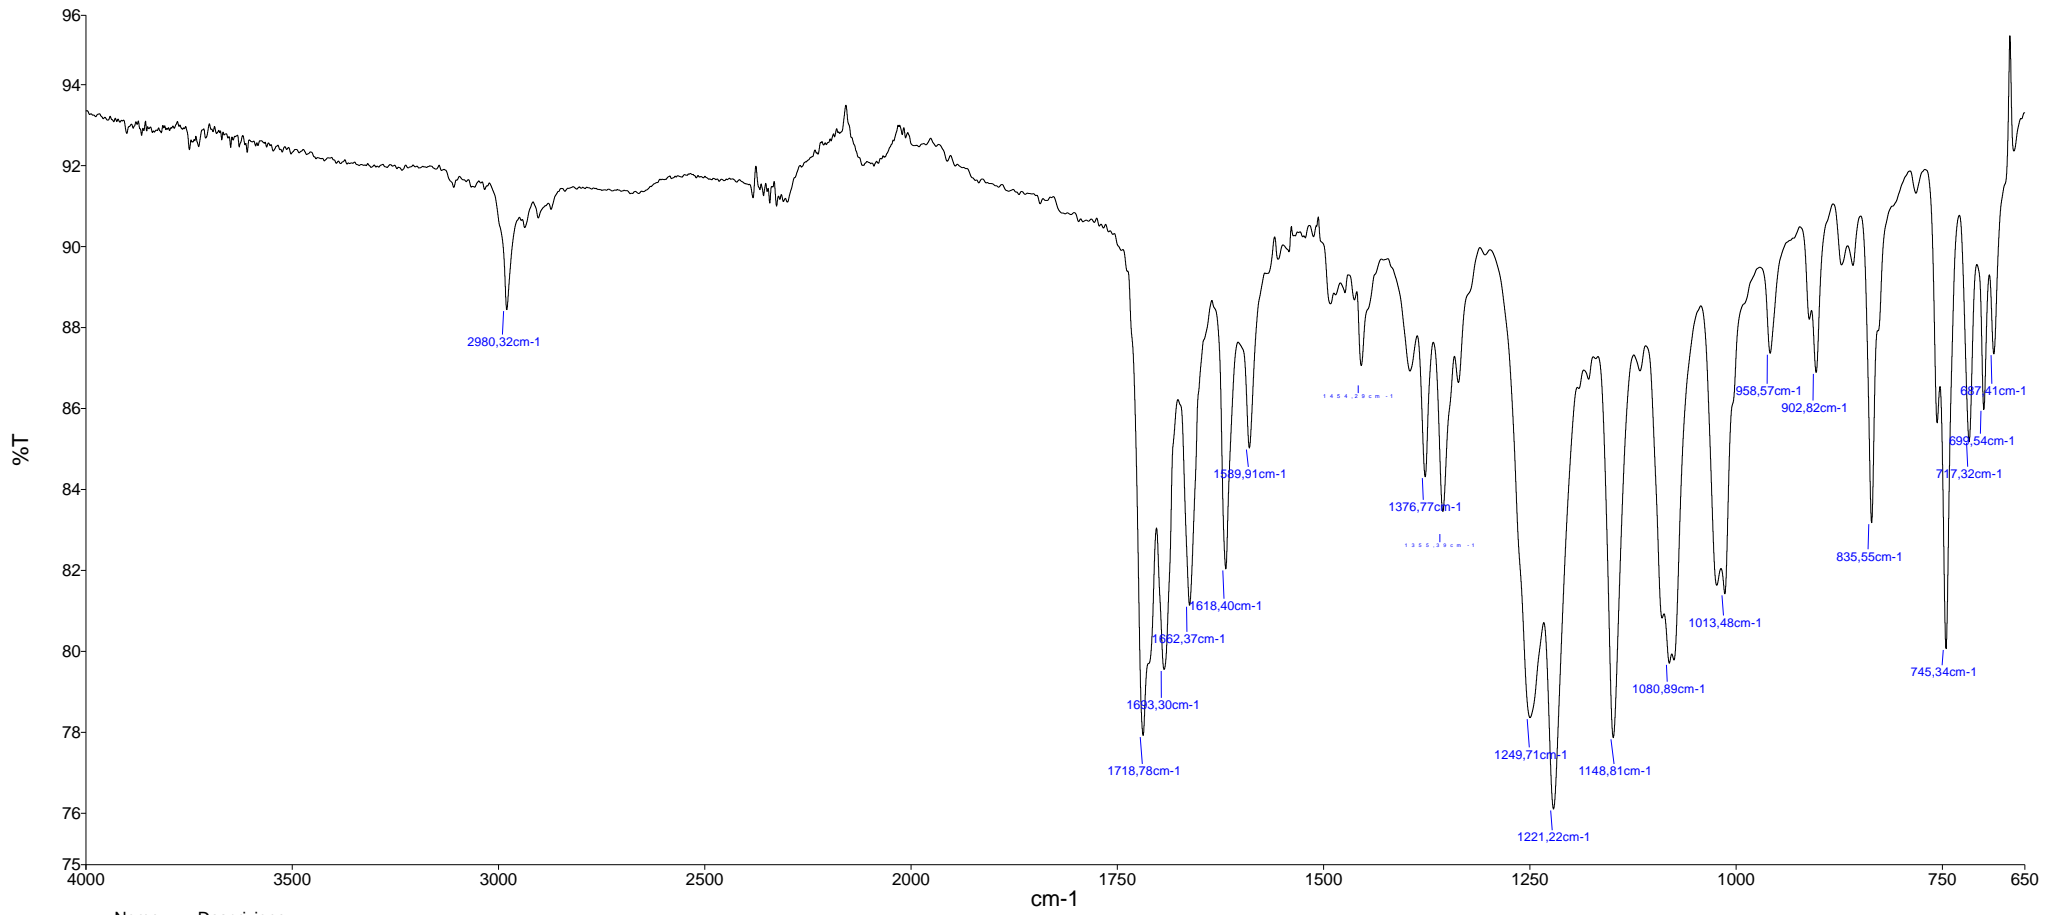

Nome Descrizione  
MC4185\_1

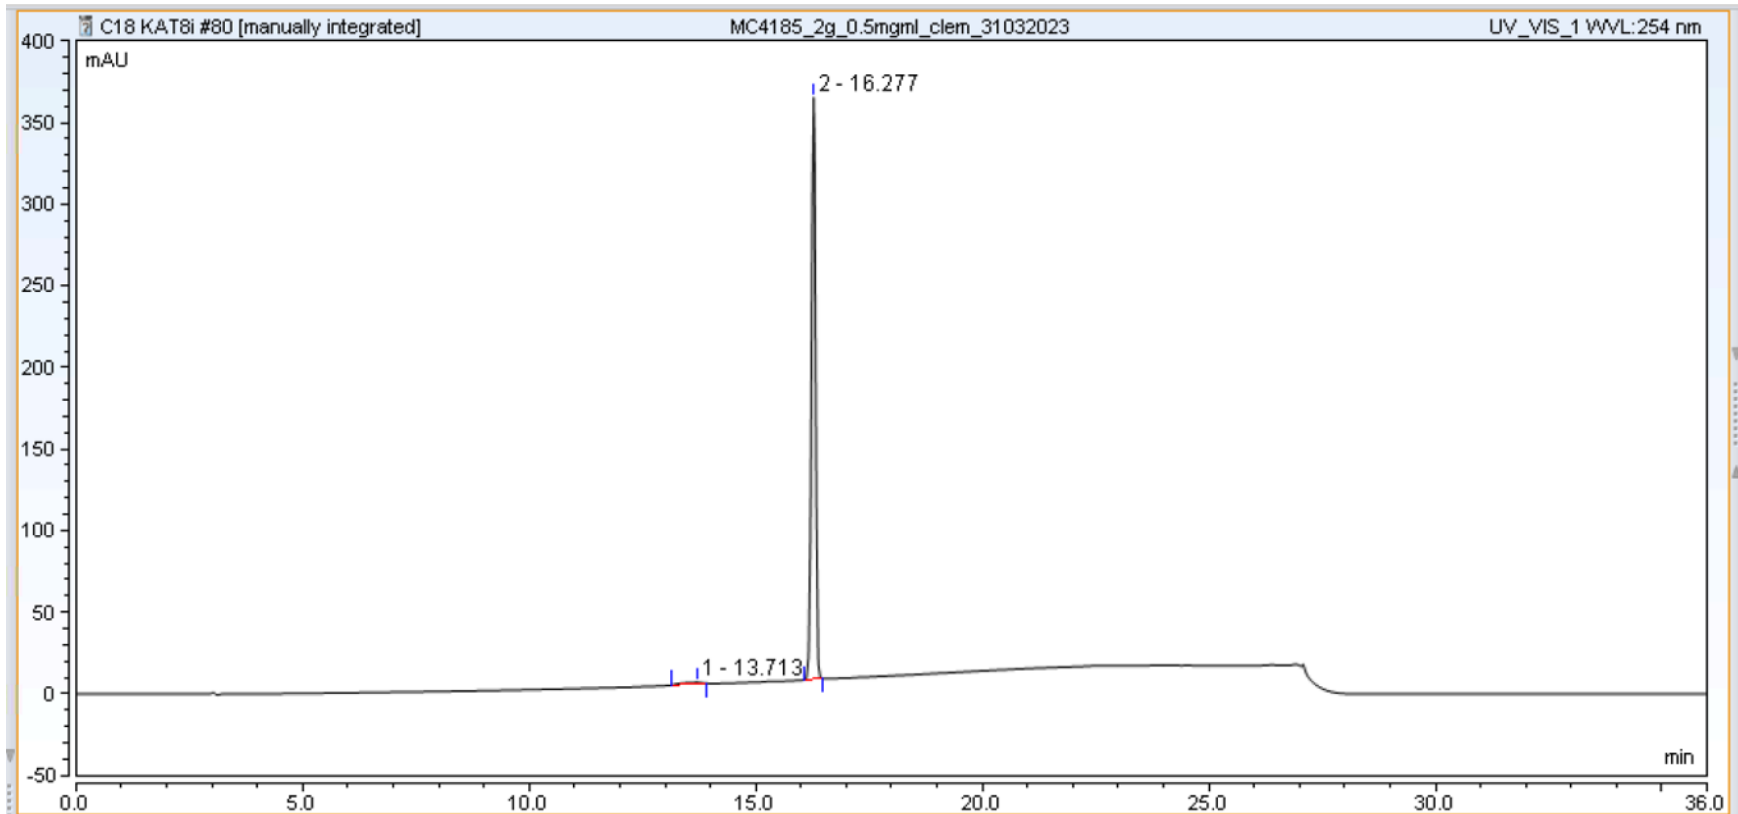

|   | A        | B             | C           | D           | E            | F          | G    | H               | I        | J         | K         |
|---|----------|---------------|-------------|-------------|--------------|------------|------|-----------------|----------|-----------|-----------|
| 1 | Peak No. | Ret. Time min | Amount n.a. | Rel. Area % | Area mAU*min | Height mAU | Type | Width (50% min) | Asym. EP | Resol. EP | Plates EP |
| 4 | 1        | 13.713        | n.a.        | 1.40        | 0.5283       | 0.86       | BMB* | 0.597           | 0.67     | 4.36      | 2926      |
| 5 | 2        | 16.277        | n.a.        | 98.60       | 37.2587      | 356.38     | BMB* | 0.098           | 0.93     | n.a.      | 153624    |
| 6 | Maximum  |               | 0.0000      | 98.60       | 37.2587      | 356.38     |      | 0.597           | 0.93     | 4.36      | 153624    |
| 7 | Minimum  |               | 0.0000      | 1.40        | 0.5283       | 0.86       |      | 0.098           | 0.67     | 4.36      | 2926      |
| 8 | Sum      |               | 0.0000      | 100.00      | 37.7869      | 357.24     |      |                 |          |           |           |
| 9 |          |               |             |             |              |            |      |                 |          |           |           |

# 2h MC4165

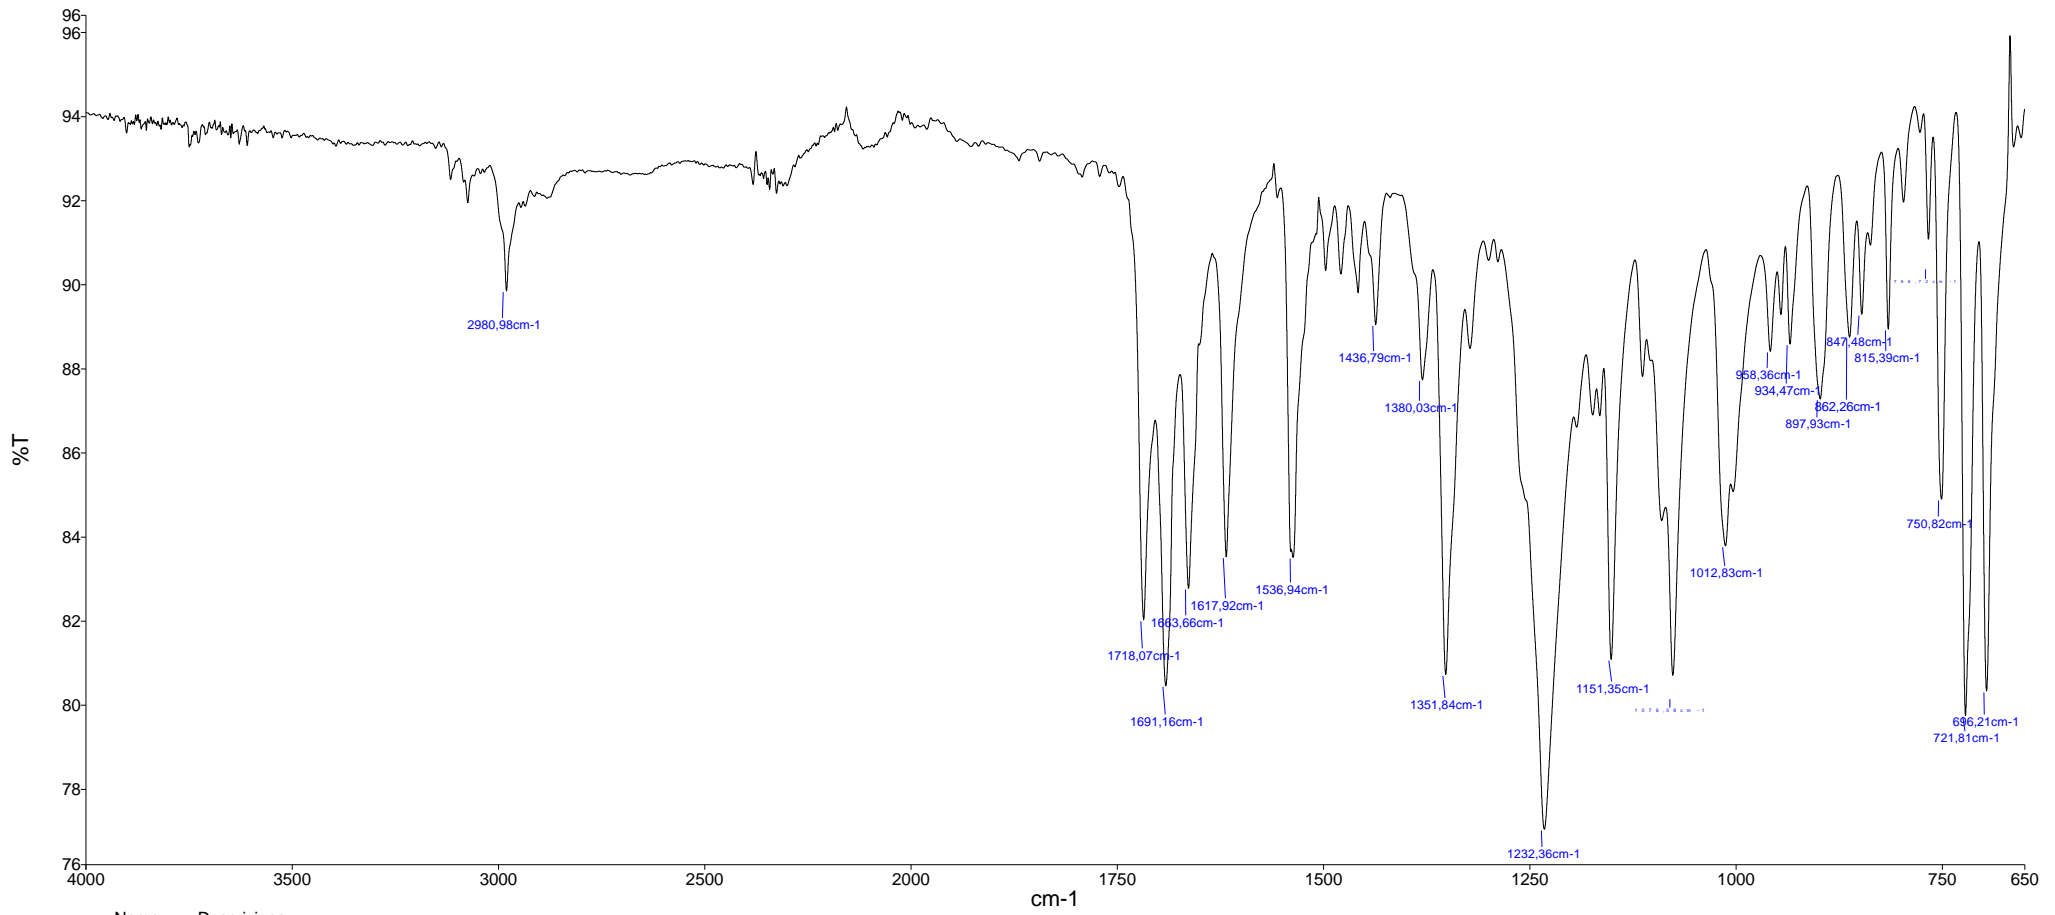

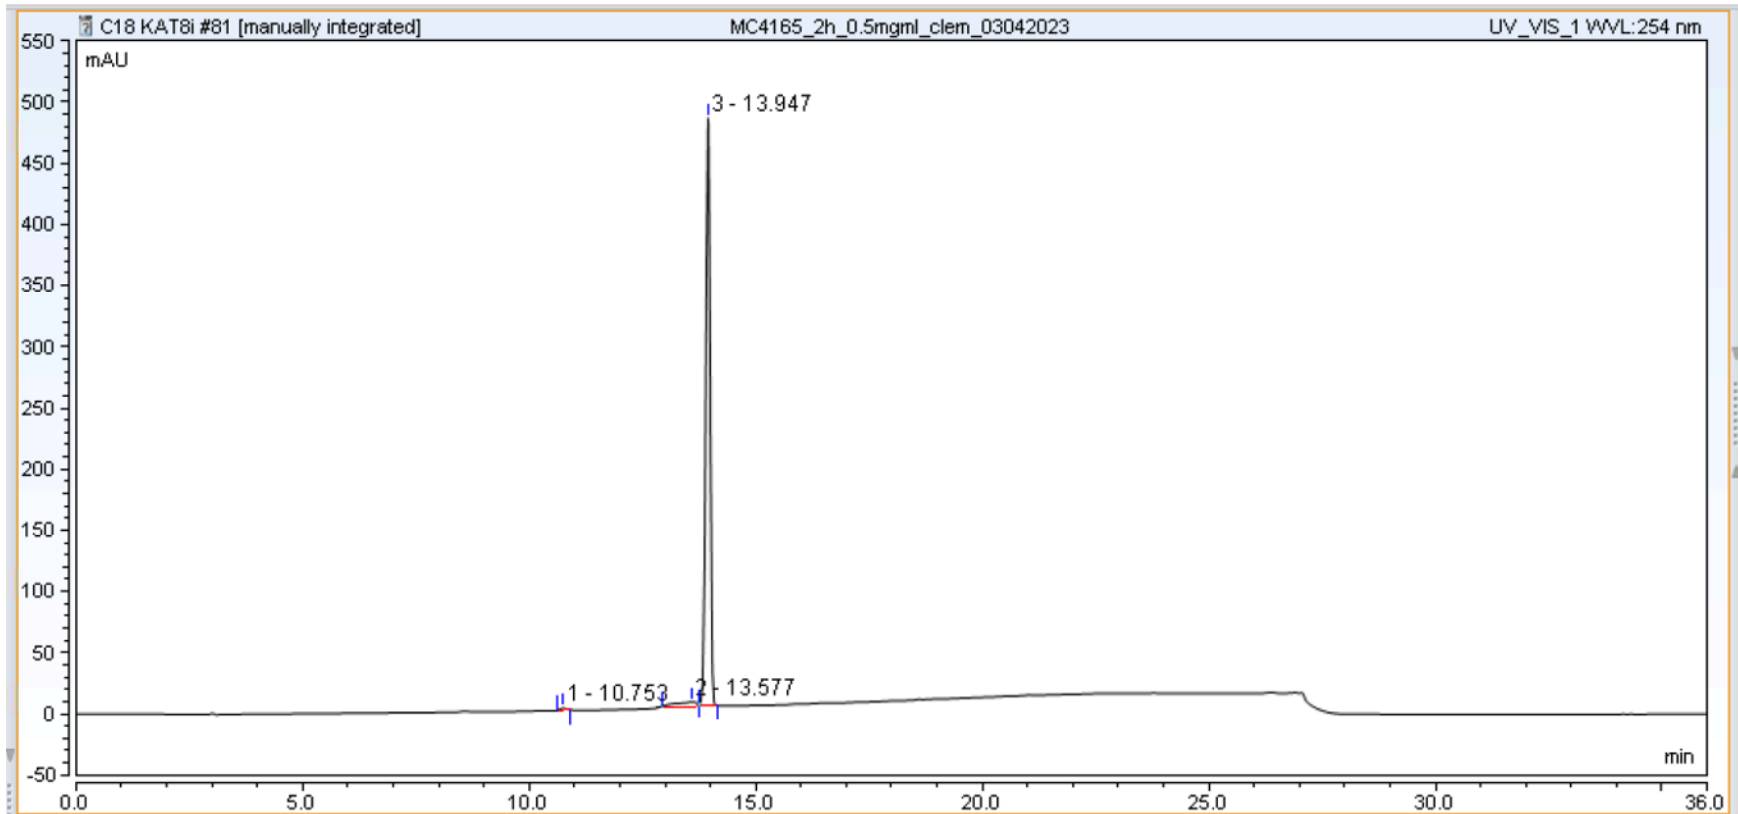

|    | A        | B            | C           | D          | E            | F          | G    | H               | I        | J         | K         |
|----|----------|--------------|-------------|------------|--------------|------------|------|-----------------|----------|-----------|-----------|
| 1  | Peak No. | Ret.Time min | Amount n.a. | Rel.Area % | Area mAU*min | Height mAU | Type | Width (50% min) | Asym. EP | Resol. EP | Plates EP |
| 4  | 1        | 10.753       | n.a.        | 0.48       | 0.2688       | 1.66       | BMB* | 0.162           | 1.08     | n.a.      | 24371     |
| 5  | 2        | 13.577       | n.a.        | 4.29       | 2.4166       | 3.79       | M *  | n.a.            | n.a.     | n.a.      | n.a.      |
| 6  | 3        | 13.947       | n.a.        | 95.23      | 53.6503      | 480.57     | MB*  | 0.105           | 0.93     | n.a.      | 97269     |
| 7  | Maximum  |              | 0.0000      | 95.23      | 53.6503      | 480.57     |      | 0.162           | 1.08     | 0.00      | 97269     |
| 8  | Minimum  |              | 0.0000      | 0.48       | 0.2688       | 1.66       |      | 0.105           | 0.93     | 0.00      | 24371     |
| 9  | Sum      |              | 0.0000      | 100.00     | 56.3357      | 486.02     |      |                 |          |           |           |
| 10 |          |              |             |            |              |            |      |                 |          |           |           |

# 2i MC4167

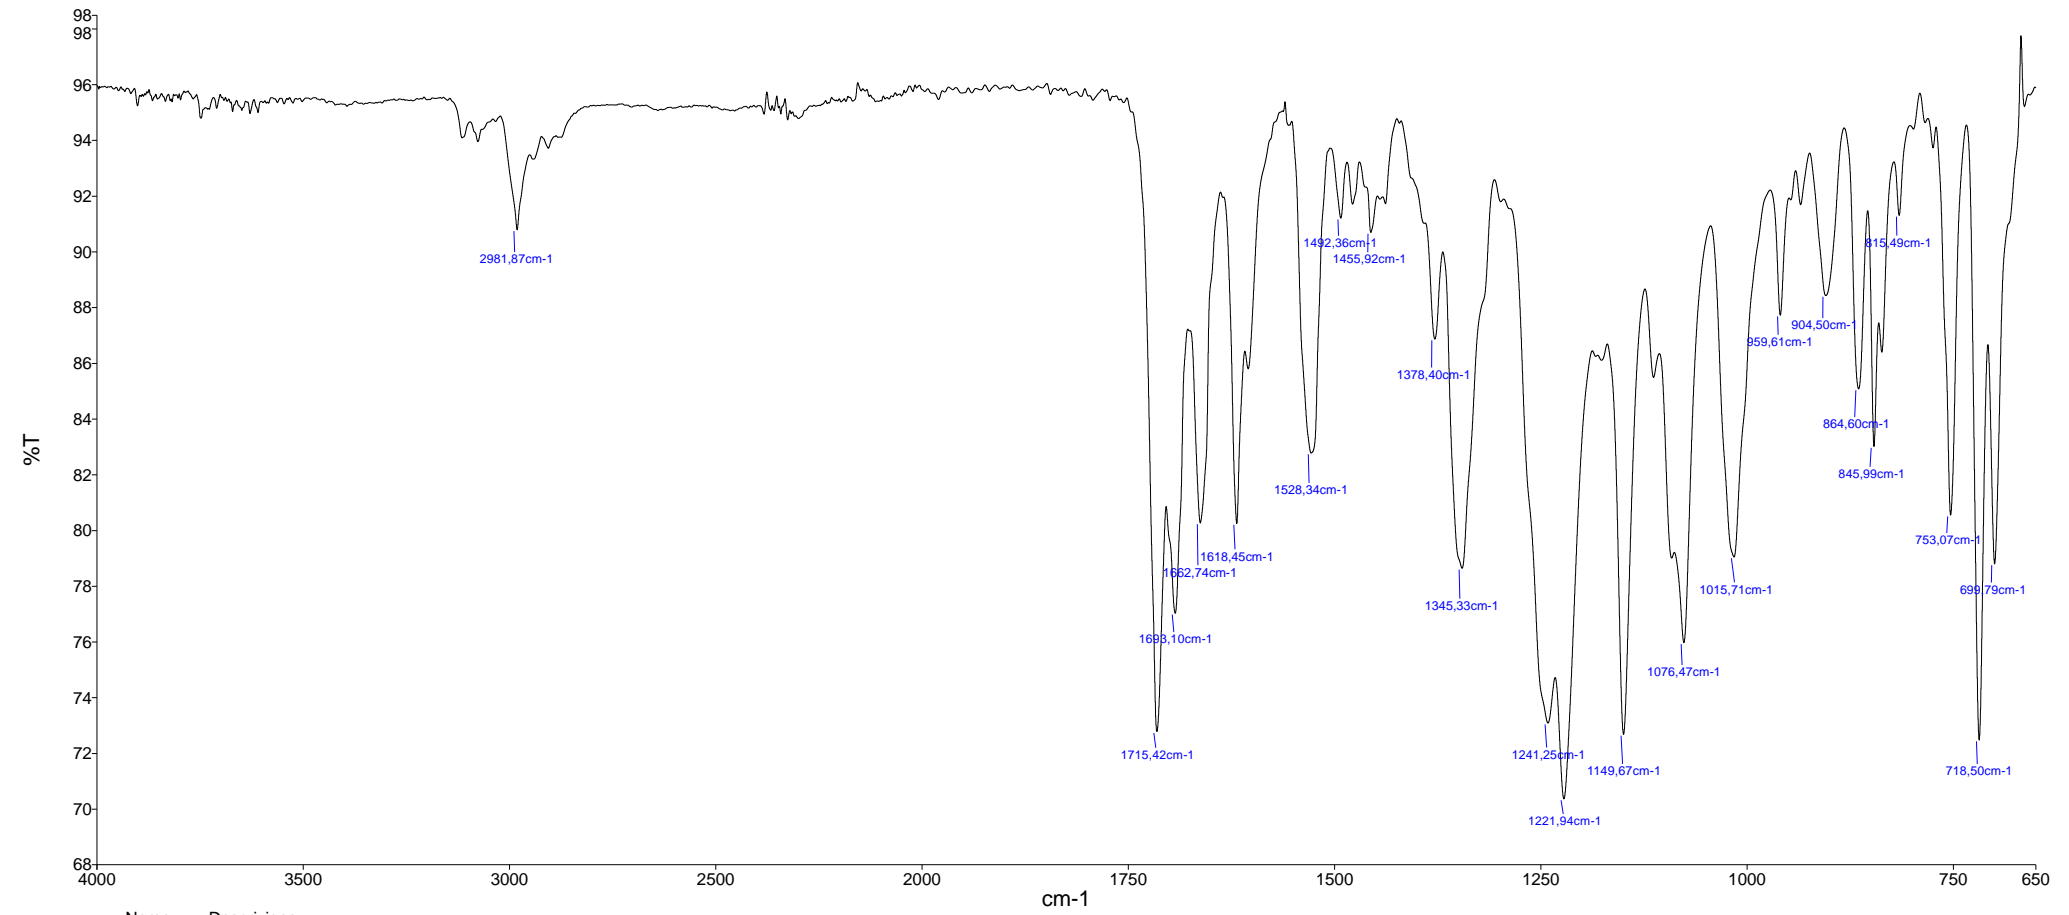

Nome Descrizione  
MC4167\_1



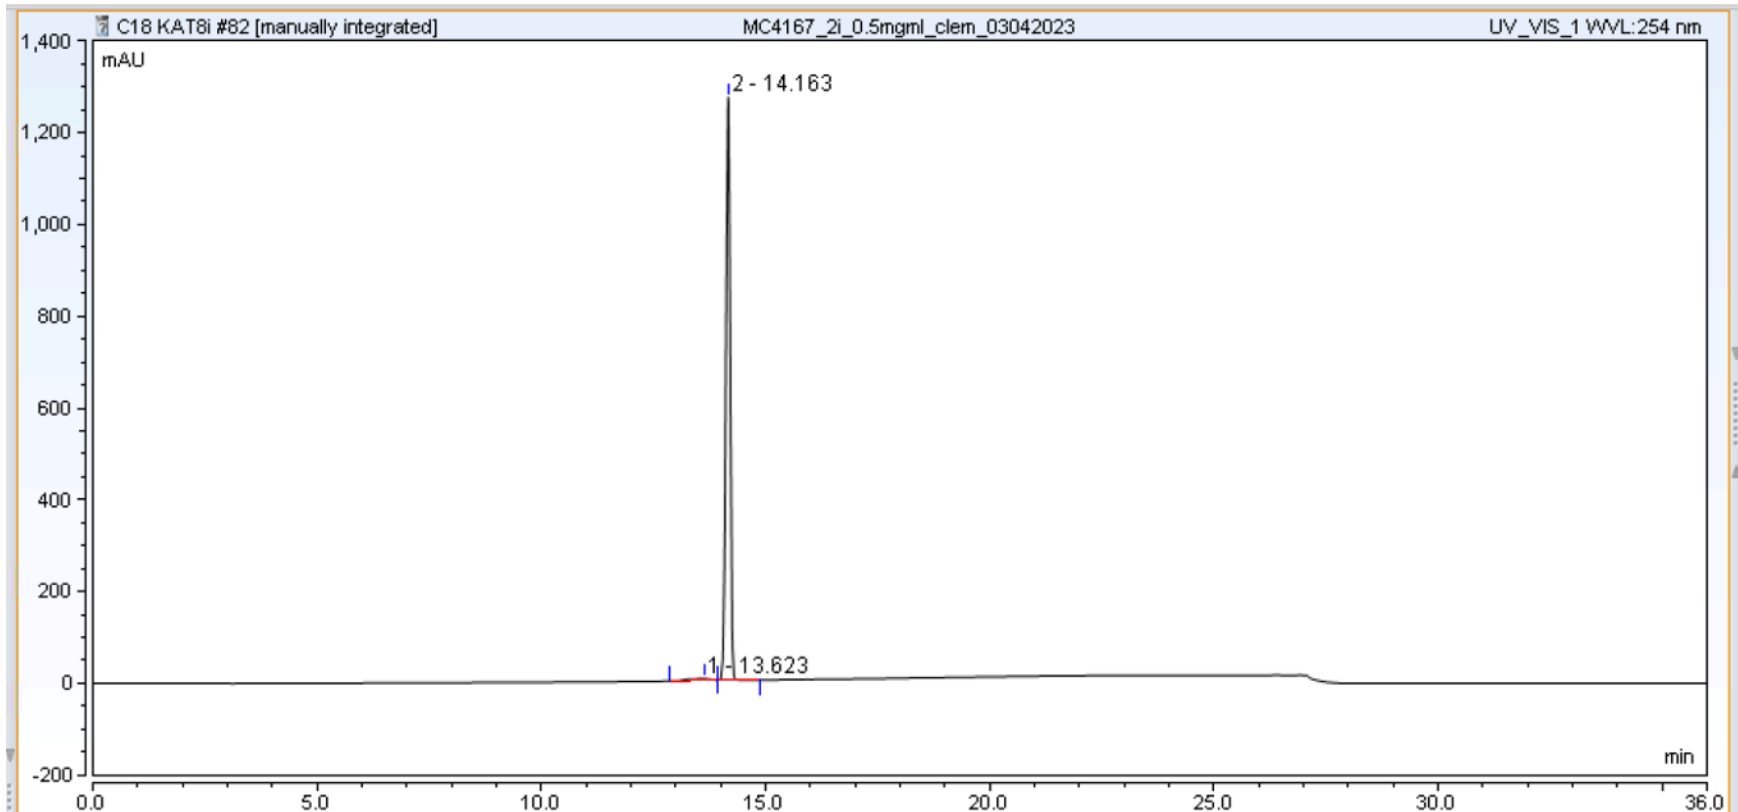

|   | A       | B        | C      | D        | E        | F       | G    | H          | I     | J      | K      |
|---|---------|----------|--------|----------|----------|---------|------|------------|-------|--------|--------|
| 1 | Peak    | Ret.Time | Amount | Rel.Area | Area     | Height  | Type | Width (50% | Asym. | Resol. | Plates |
| 2 | No.     | min      | n.a.   | %        | mAU*min  | mAU     |      | min        | EP    | EP     | EP     |
| 4 | 1       | 13.623   | n.a.   | 1.90     | 2.7416   | 4.18    | BM   | 0.655      | n.a.  | 0.84   | 2395   |
| 5 | 2       | 14.163   | n.a.   | 98.10    | 141.2413 | 1270.74 | MB   | 0.105      | 0.93  | n.a.   | 101341 |
| 6 | Maximum |          | 0.0000 | 98.10    | 141.2413 | 1270.74 |      | 0.655      | 0.93  | 0.84   | 101341 |
| 7 | Minimum |          | 0.0000 | 1.90     | 2.7416   | 4.18    |      | 0.105      | 0.93  | 0.84   | 2395   |
| 8 | Sum     |          | 0.0000 | 100.00   | 143.9829 | 1274.92 |      |            |       |        |        |
| 9 |         |          |        |          |          |         |      |            |       |        |        |

# 2j MC4177

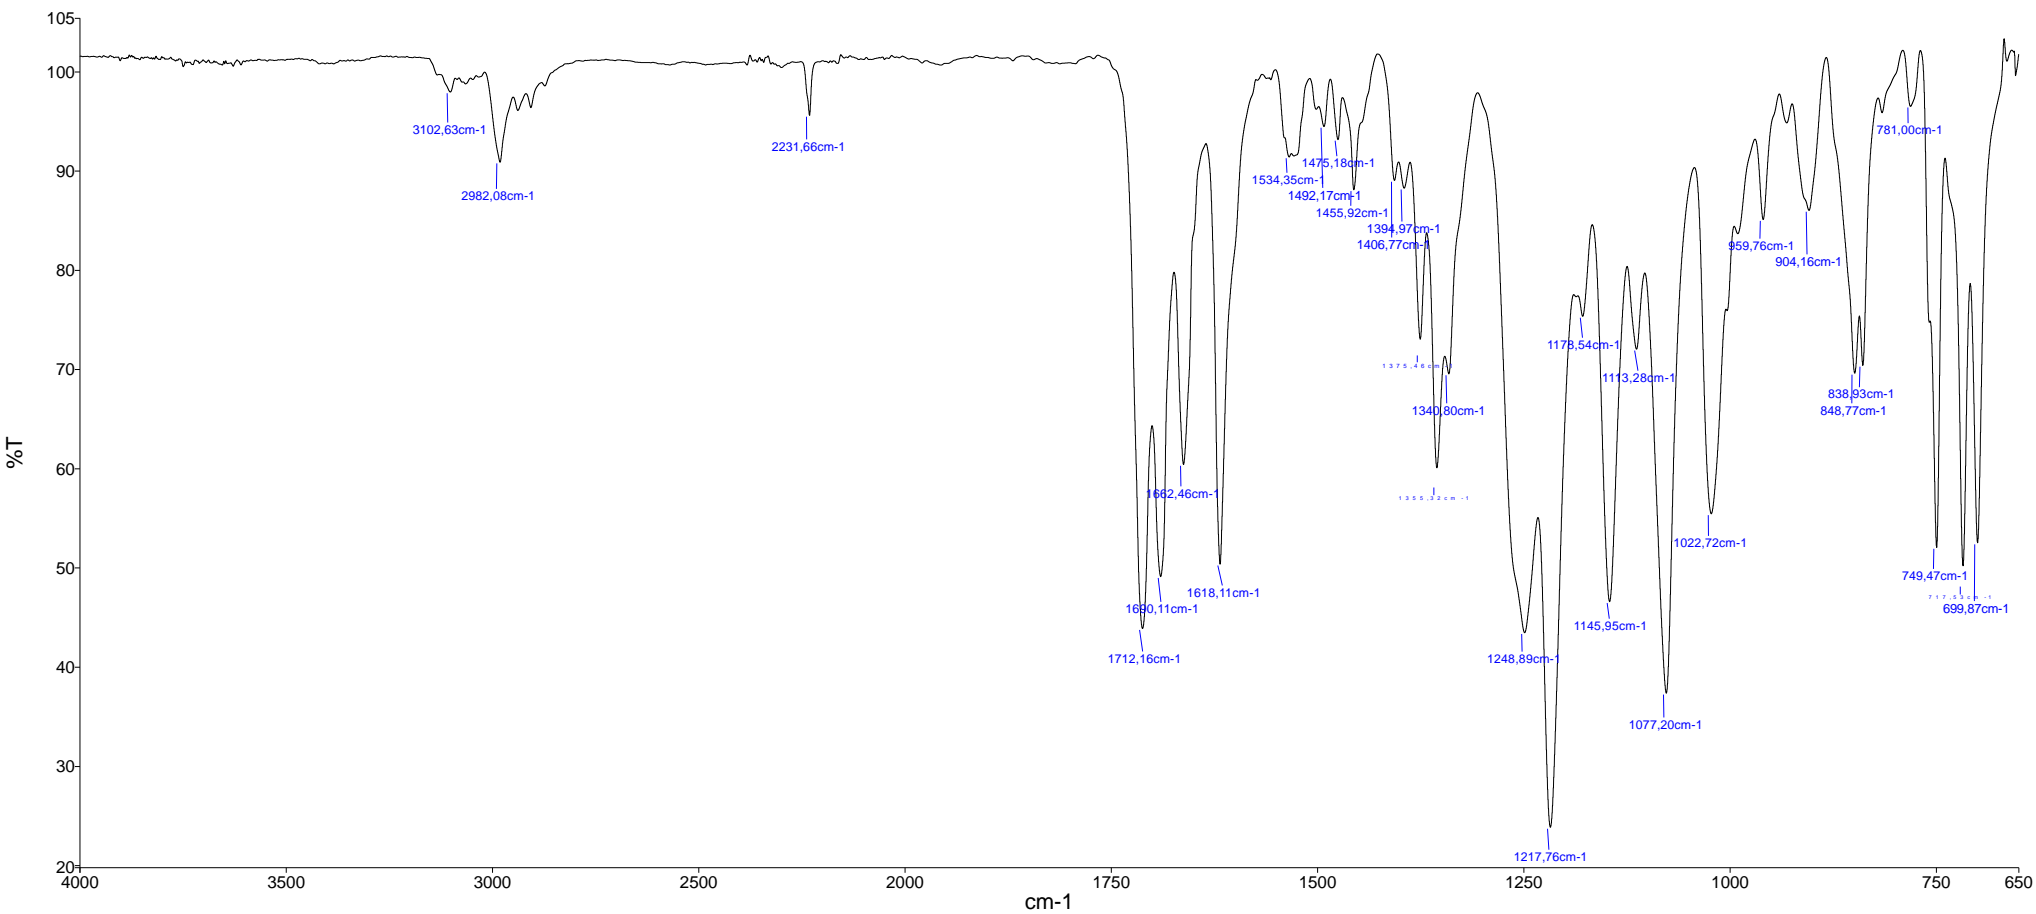

Nome Descrizione  
MC4177\_1

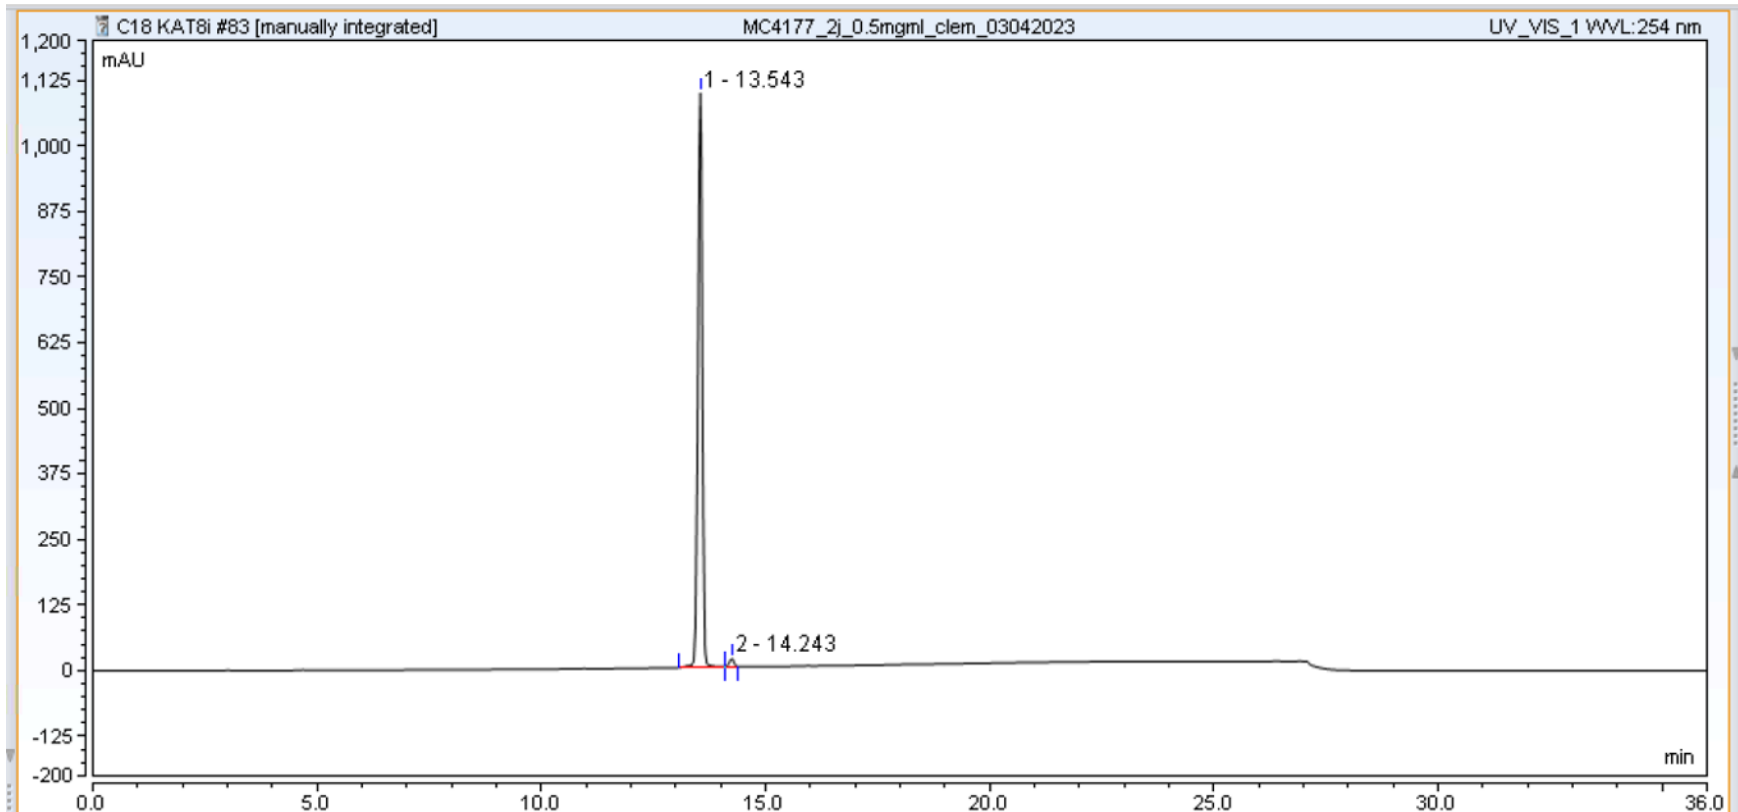

|   | A       | B        | C      | D        | E        | F       | G    | H          | I     | J      | K      |
|---|---------|----------|--------|----------|----------|---------|------|------------|-------|--------|--------|
| 1 | Peak    | Ret.Time | Amount | Rel.Area | Area     | Height  | Type | Width (50% | Asym. | Resol. | Plates |
| 2 | No.     | min      | n.a.   | %        | mAU*min  | mAU     |      | min        | EP    | EP     | EP     |
| 4 | 1       | 13.543   | n.a.   | 98.51    | 124.4290 | 1094.52 | BM * | 0.106      | 0.91  | 3.85   | 90784  |
| 5 | 2       | 14.243   | n.a.   | 1.49     | 1.8771   | 16.17   | MB*  | 0.109      | 0.87  | n.a.   | 95132  |
| 6 | Maximum |          | 0.0000 | 98.51    | 124.4290 | 1094.52 |      | 0.109      | 0.91  | 3.85   | 95132  |
| 7 | Minimum |          | 0.0000 | 1.49     | 1.8771   | 16.17   |      | 0.106      | 0.87  | 3.85   | 90784  |
| 8 | Sum     |          | 0.0000 | 100.00   | 126.3062 | 1110.69 |      |            |       |        |        |
| 9 |         |          |        |          |          |         |      |            |       |        |        |

# 2k MC4208

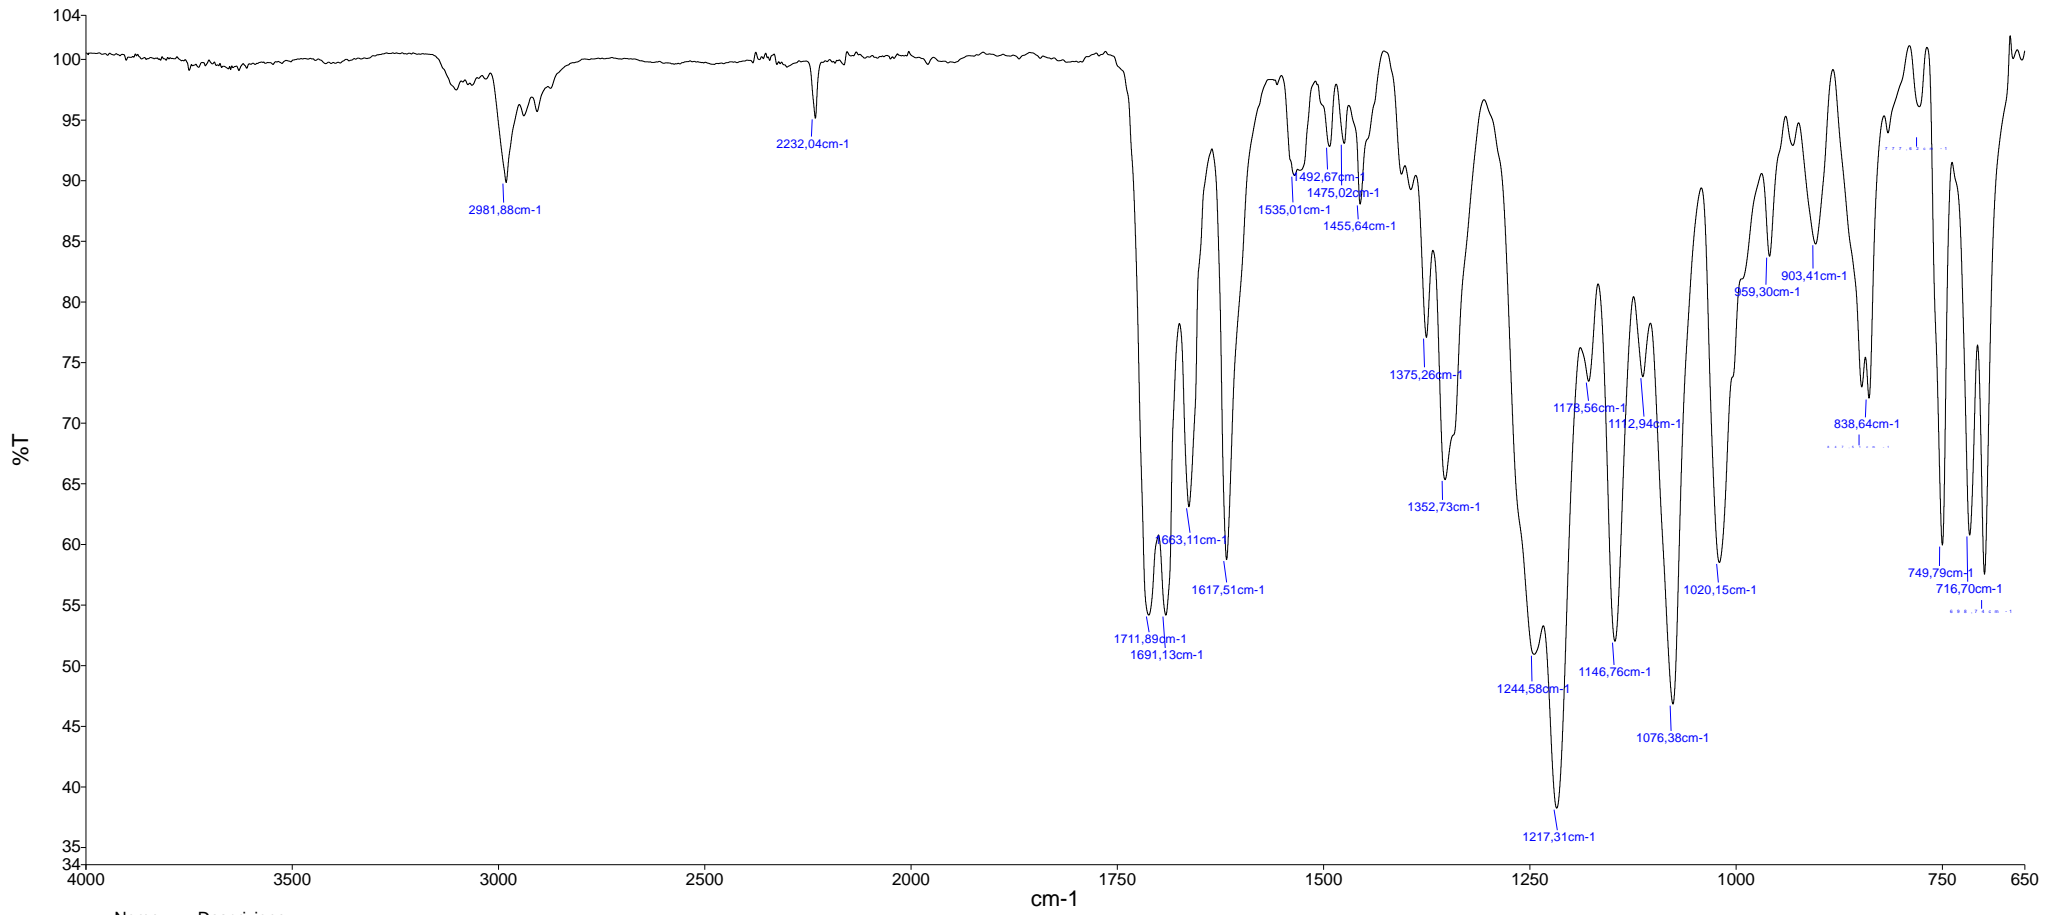

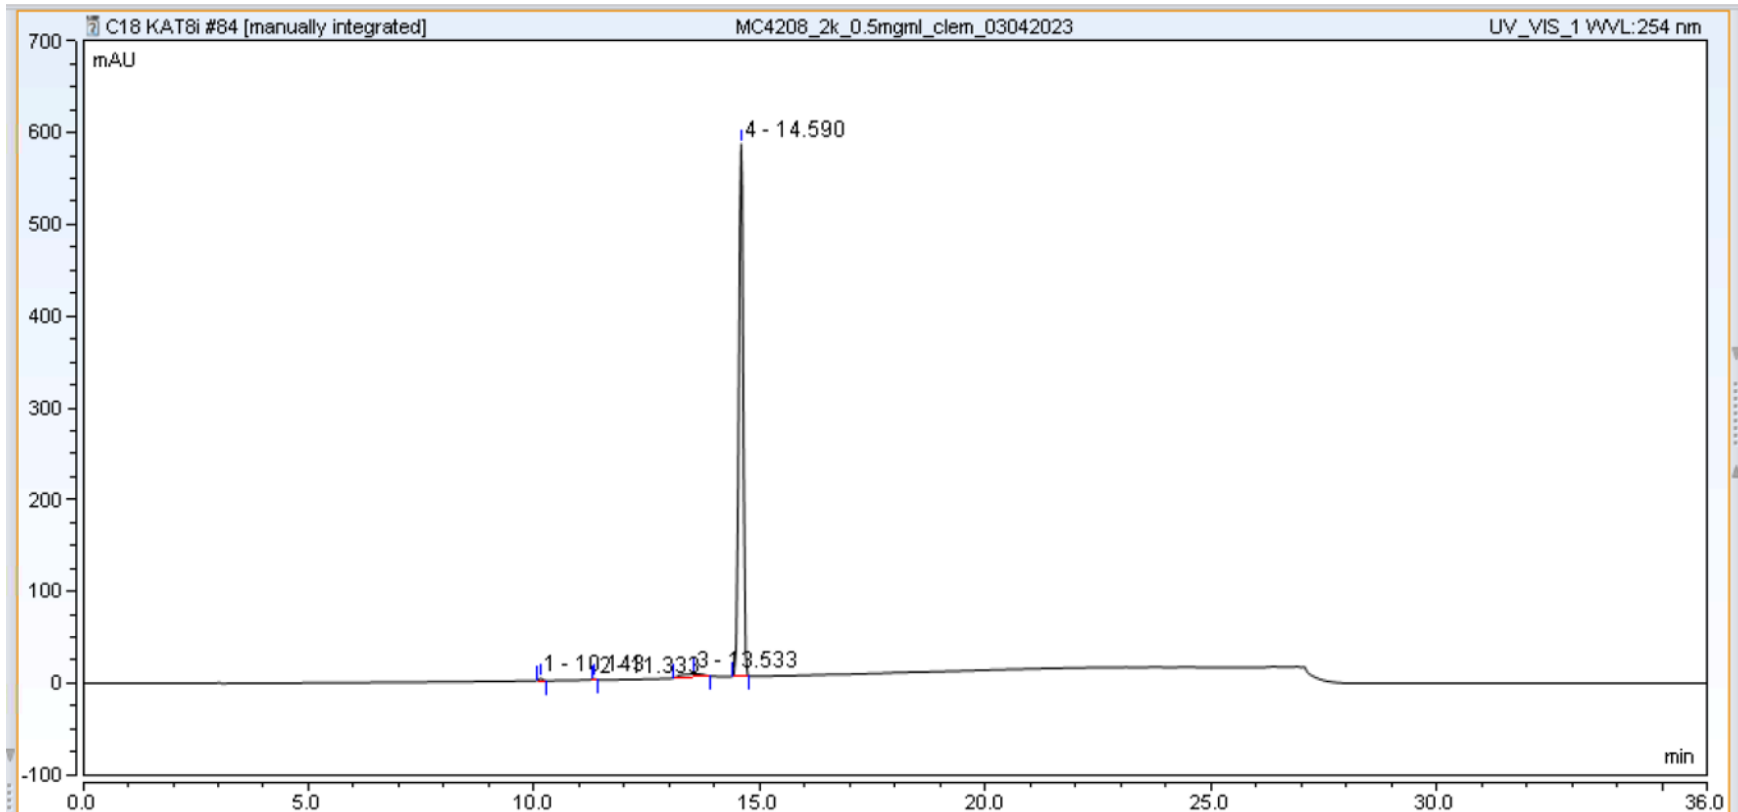

|    | A       | B        | C      | D        | E       | F      | G    | H          | I     | J      | K      |
|----|---------|----------|--------|----------|---------|--------|------|------------|-------|--------|--------|
| 1  | Peak    | Ret.Time | Amount | Rel.Area | Area    | Height | Type | Width (50% | Asym. | Resol. | Plates |
| 2  | No.     | min      | n.a.   | %        | mAU*min | mAU    |      | min        | EP    | EP     | EP     |
| 4  | 1       | 10.143   | n.a.   | 0.37     | 0.2459  | 2.42   | BMB* | 0.100      | 1.02  | 7.80   | 57444  |
| 5  | 2       | 11.333   | n.a.   | 0.11     | 0.0772  | 0.98   | BMB* | 0.080      | 1.10  | 3.98   | 109900 |
| 6  | 3       | 13.533   | n.a.   | 2.68     | 1.8011  | 3.39   | BMB* | 0.573      | 0.91  | 1.84   | 3095   |
| 7  | 4       | 14.590   | n.a.   | 96.84    | 65.1264 | 579.71 | BMB* | 0.106      | 0.92  | n.a.   | 104457 |
| 8  | Maximum |          | 0.0000 | 96.84    | 65.1264 | 579.71 |      | 0.573      | 1.10  | 7.80   | 109900 |
| 9  | Minimum |          | 0.0000 | 0.11     | 0.0772  | 0.98   |      | 0.080      | 0.91  | 1.84   | 3095   |
| 10 | Sum     |          | 0.0000 | 100.00   | 67.2506 | 586.51 |      |            |       |        |        |
| 11 |         |          |        |          |         |        |      |            |       |        |        |

# 2I MC4204

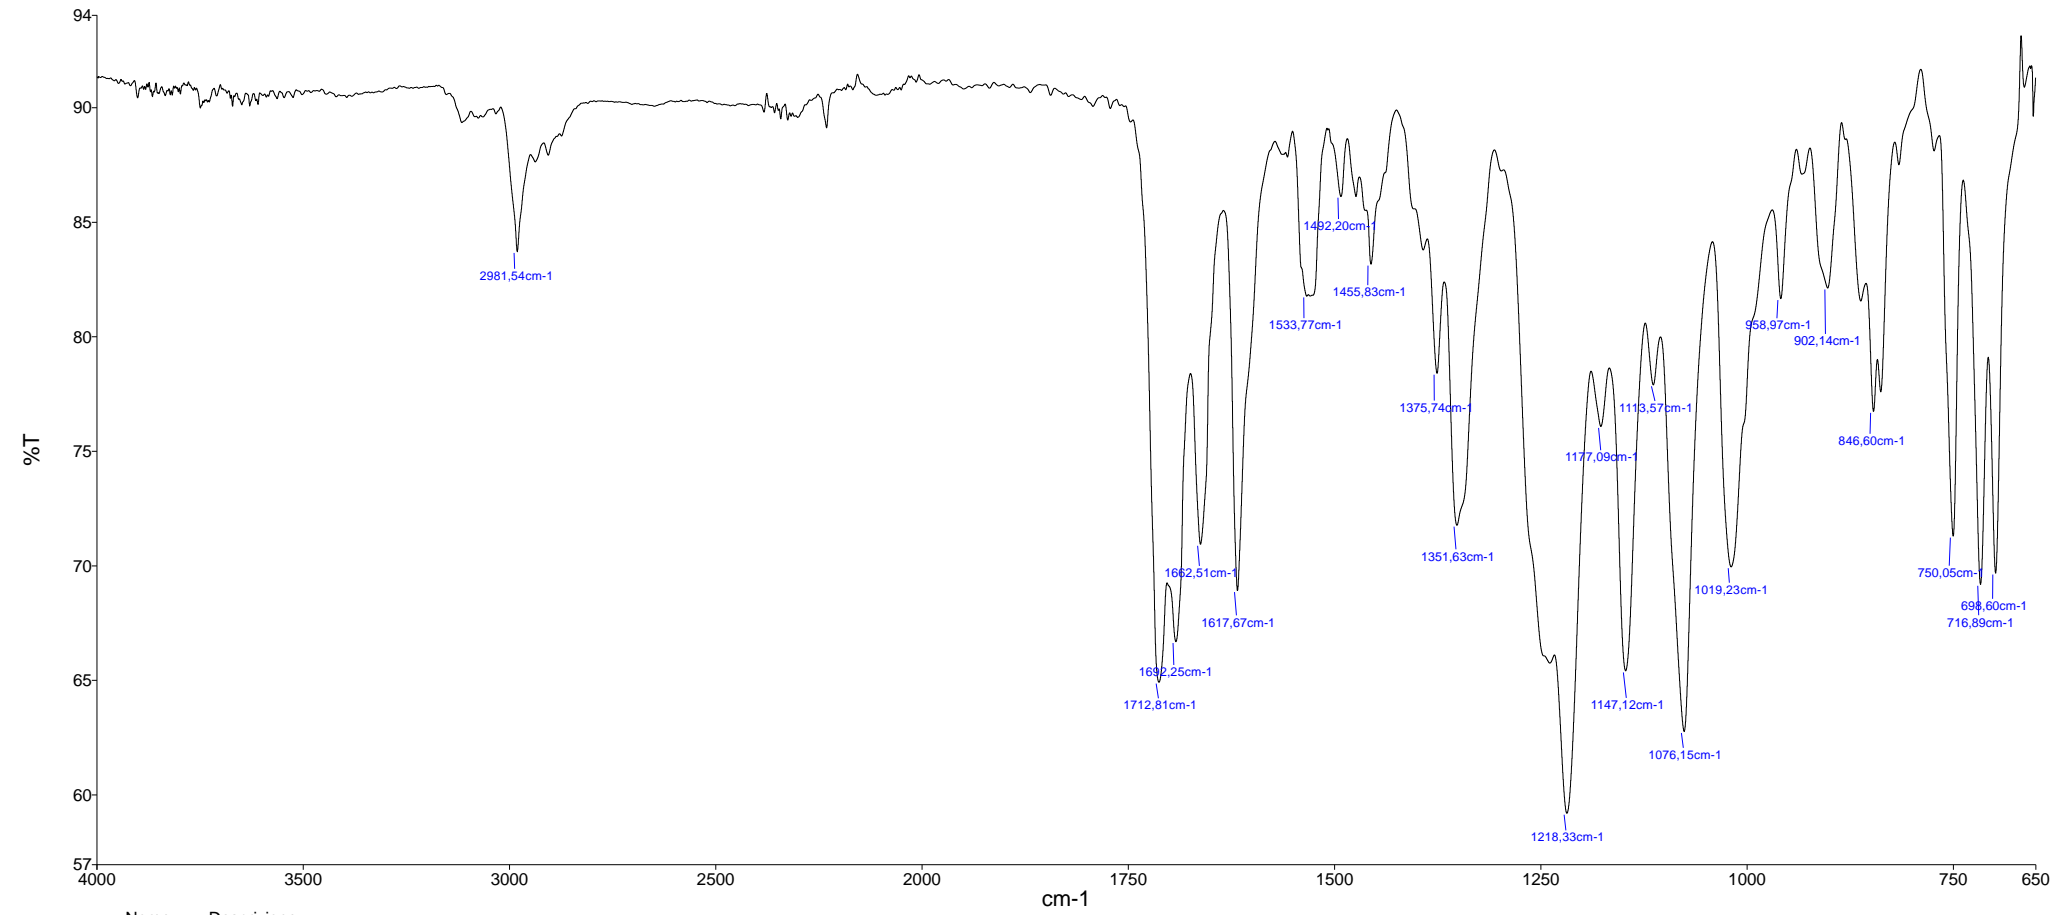

Nome Descrizione  
MC4204\_1

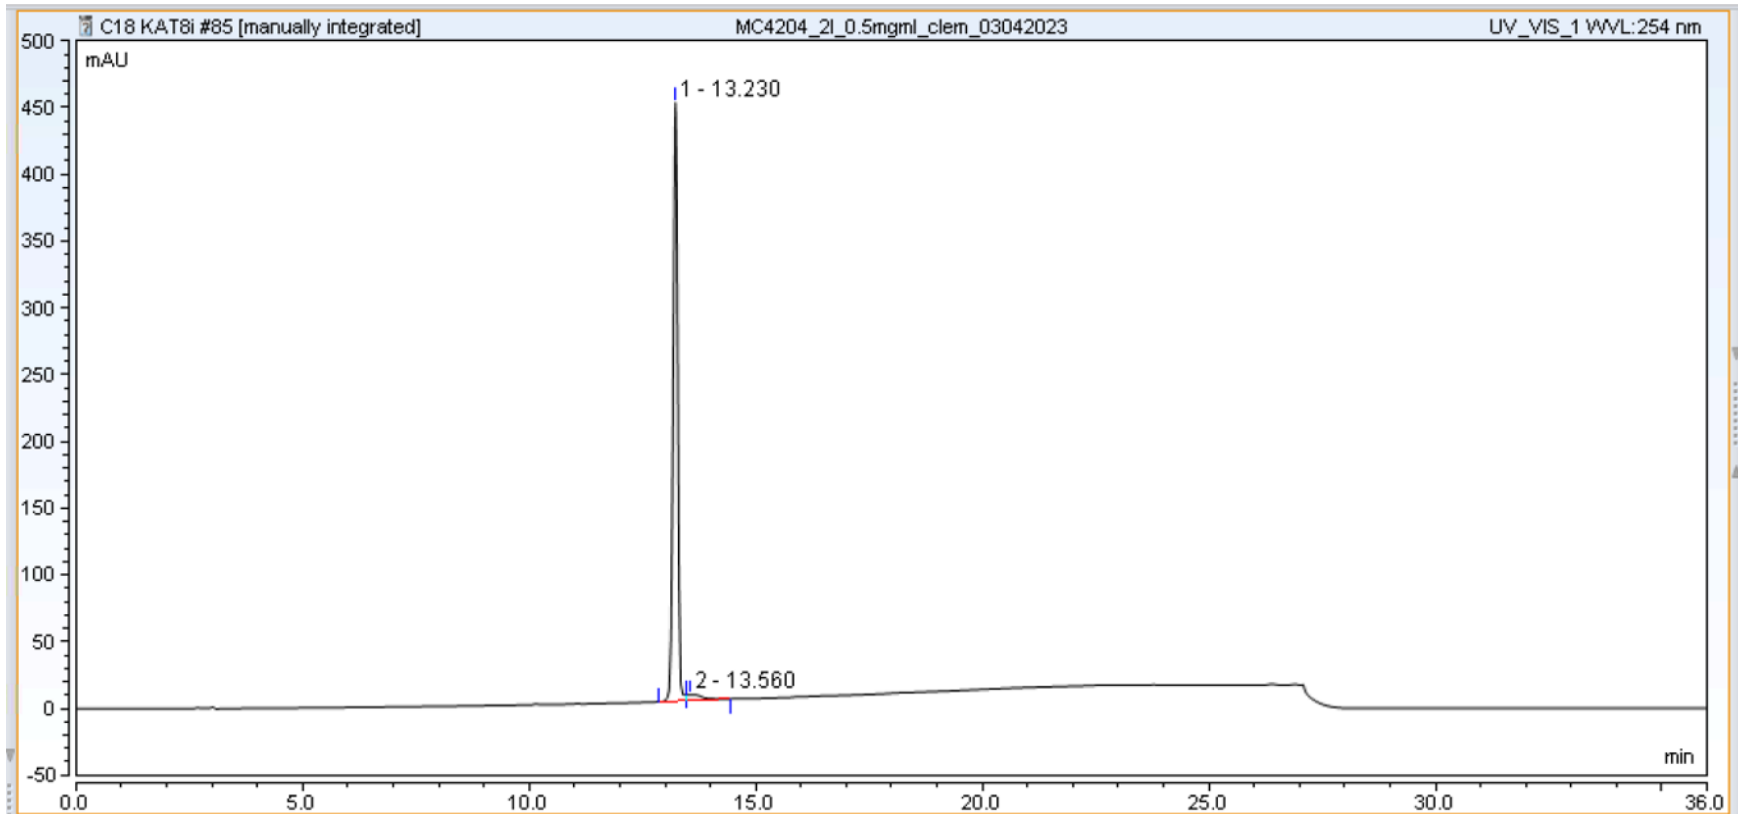

|   | A       | B        | C      | D        | E       | F      | G    | H          | I     | J      | K      |
|---|---------|----------|--------|----------|---------|--------|------|------------|-------|--------|--------|
| 1 | Peak    | Ret.Time | Amount | Rel.Area | Area    | Height | Type | Width (50% | Asym. | Resol. | Plates |
| 2 | No.     | min      |        | %        | mAU*min | mAU    |      | min        | EP    | EP     | EP     |
| 4 | 1       | 13.230   | n.a.   | 96.66    | 52.0938 | 448.22 | BM   | 0.108      | 0.93  | n.a.   | 83258  |
| 5 | 2       | 13.560   | n.a.   | 3.34     | 1.8026  | 4.35   | MB   | n.a.       | n.a.  | n.a.   | n.a.   |
| 6 | Maximum |          | 0.0000 | 96.66    | 52.0938 | 448.22 |      | 0.108      | 0.93  | 0.00   | 83258  |
| 7 | Minimum |          | 0.0000 | 3.34     | 1.8026  | 4.35   |      | 0.108      | 0.93  | 0.00   | 83258  |
| 8 | Sum     |          | 0.0000 | 100.00   | 53.8964 | 452.57 |      |            |       |        |        |
| 9 |         |          |        |          |         |        |      |            |       |        |        |

# 2m MC4188

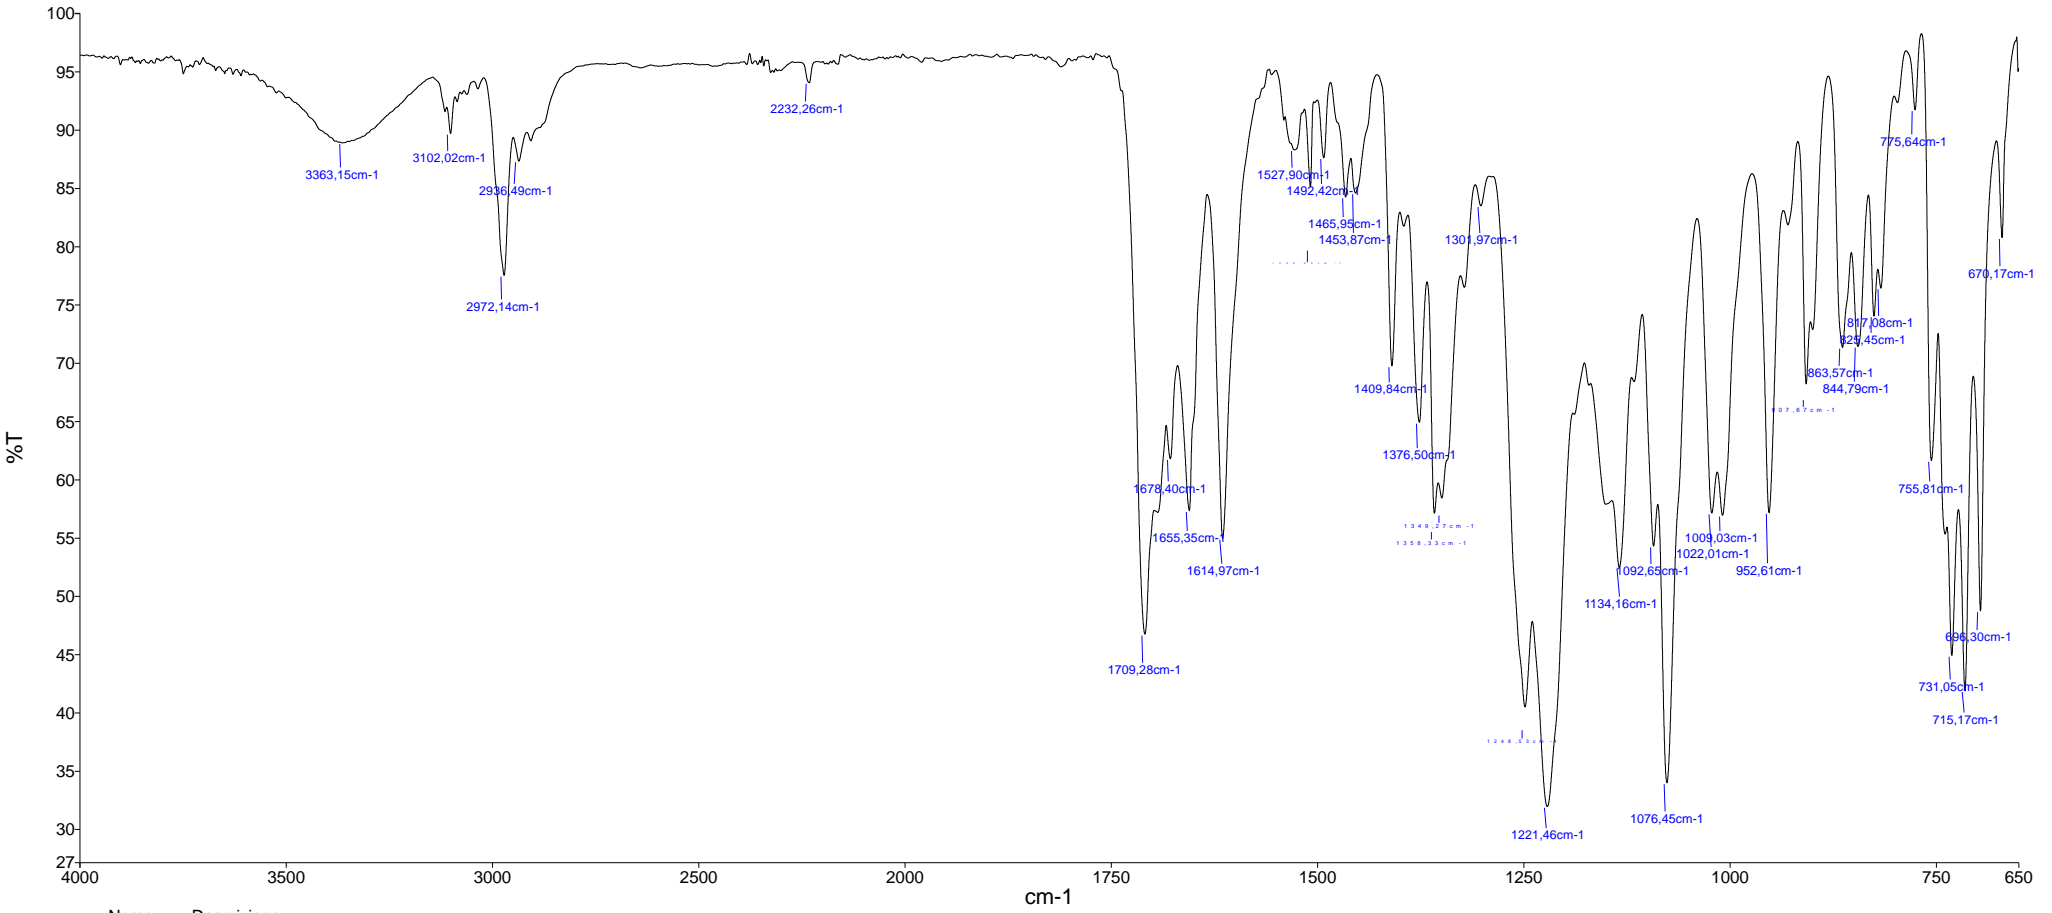



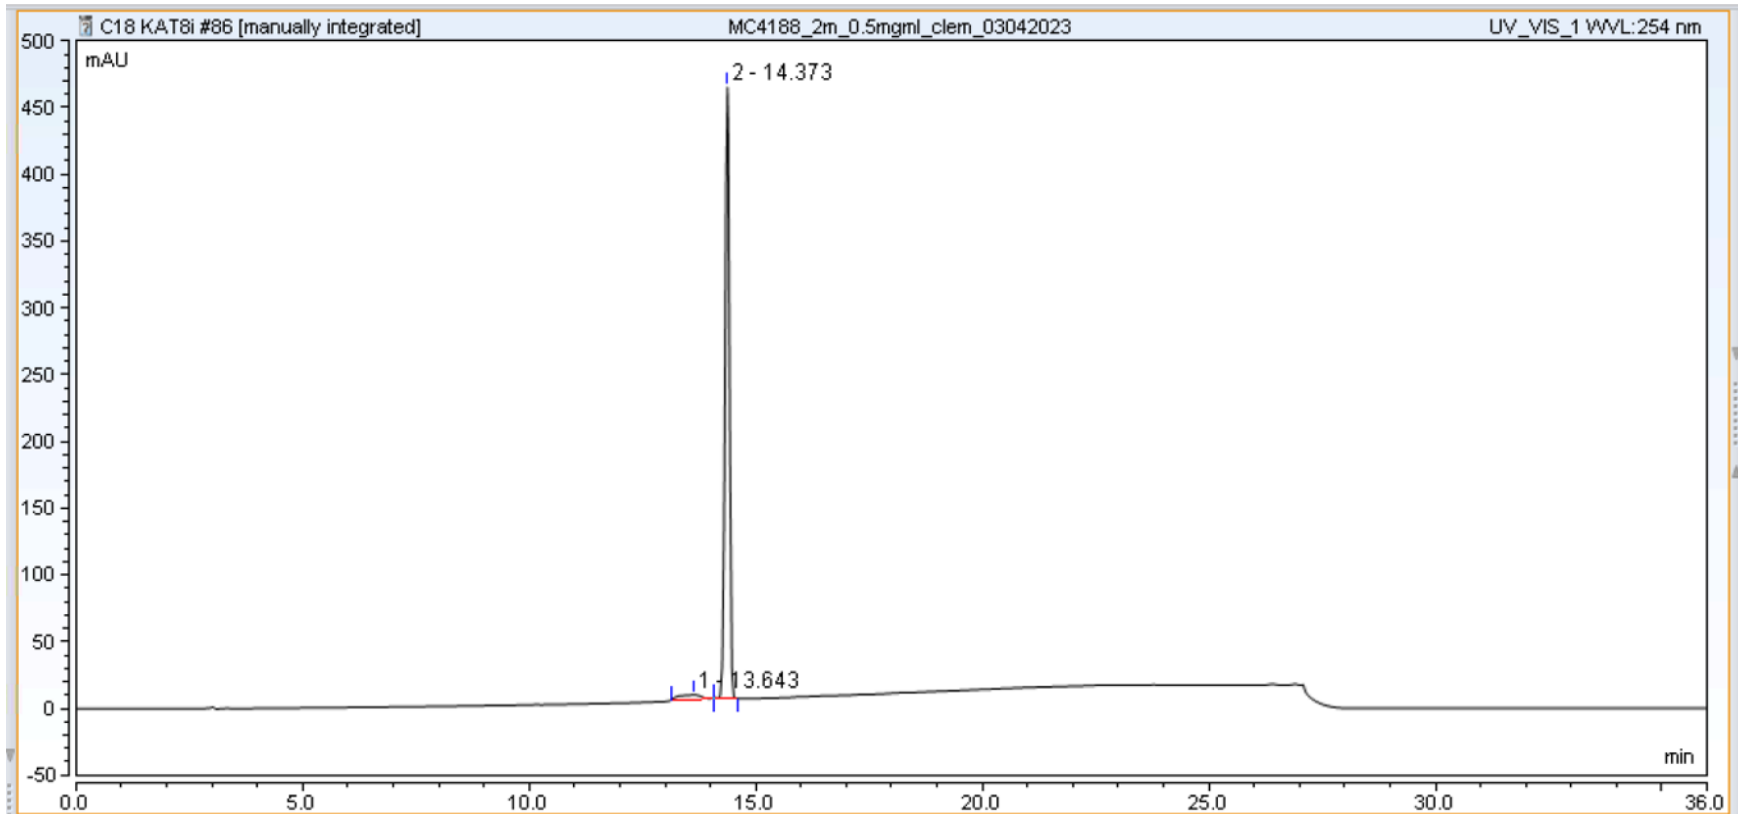

|   | A        | B             | C      | D           | E            | F          | G    | H               | I        | J         | K         |
|---|----------|---------------|--------|-------------|--------------|------------|------|-----------------|----------|-----------|-----------|
| 1 | Peak No. | Ret. Time min | Amount | Rel. Area % | Area mAU*min | Height mAU | Type | Width (50% min) | Asym. EP | Resol. EP | Plates EP |
| 4 | 1        | 13.643        | n.a.   | 3.96        | 2.1446       | 3.42       | BM * | 0.617           | n.a.     | 1.19      | 2712      |
| 5 | 2        | 14.373        | n.a.   | 96.04       | 52.0605      | 458.00     | MB*  | 0.107           | 0.92     | n.a.      | 99766     |
| 6 | Maximum  |               | 0.0000 | 96.04       | 52.0605      | 458.00     |      | 0.617           | 0.92     | 1.19      | 99766     |
| 7 | Minimum  |               | 0.0000 | 3.96        | 2.1446       | 3.42       |      | 0.107           | 0.92     | 1.19      | 2712      |
| 8 | Sum      |               | 0.0000 | 100.00      | 54.2051      | 461.42     |      |                 |          |           |           |
| 9 |          |               |        |             |              |            |      |                 |          |           |           |

# 2n MC4186

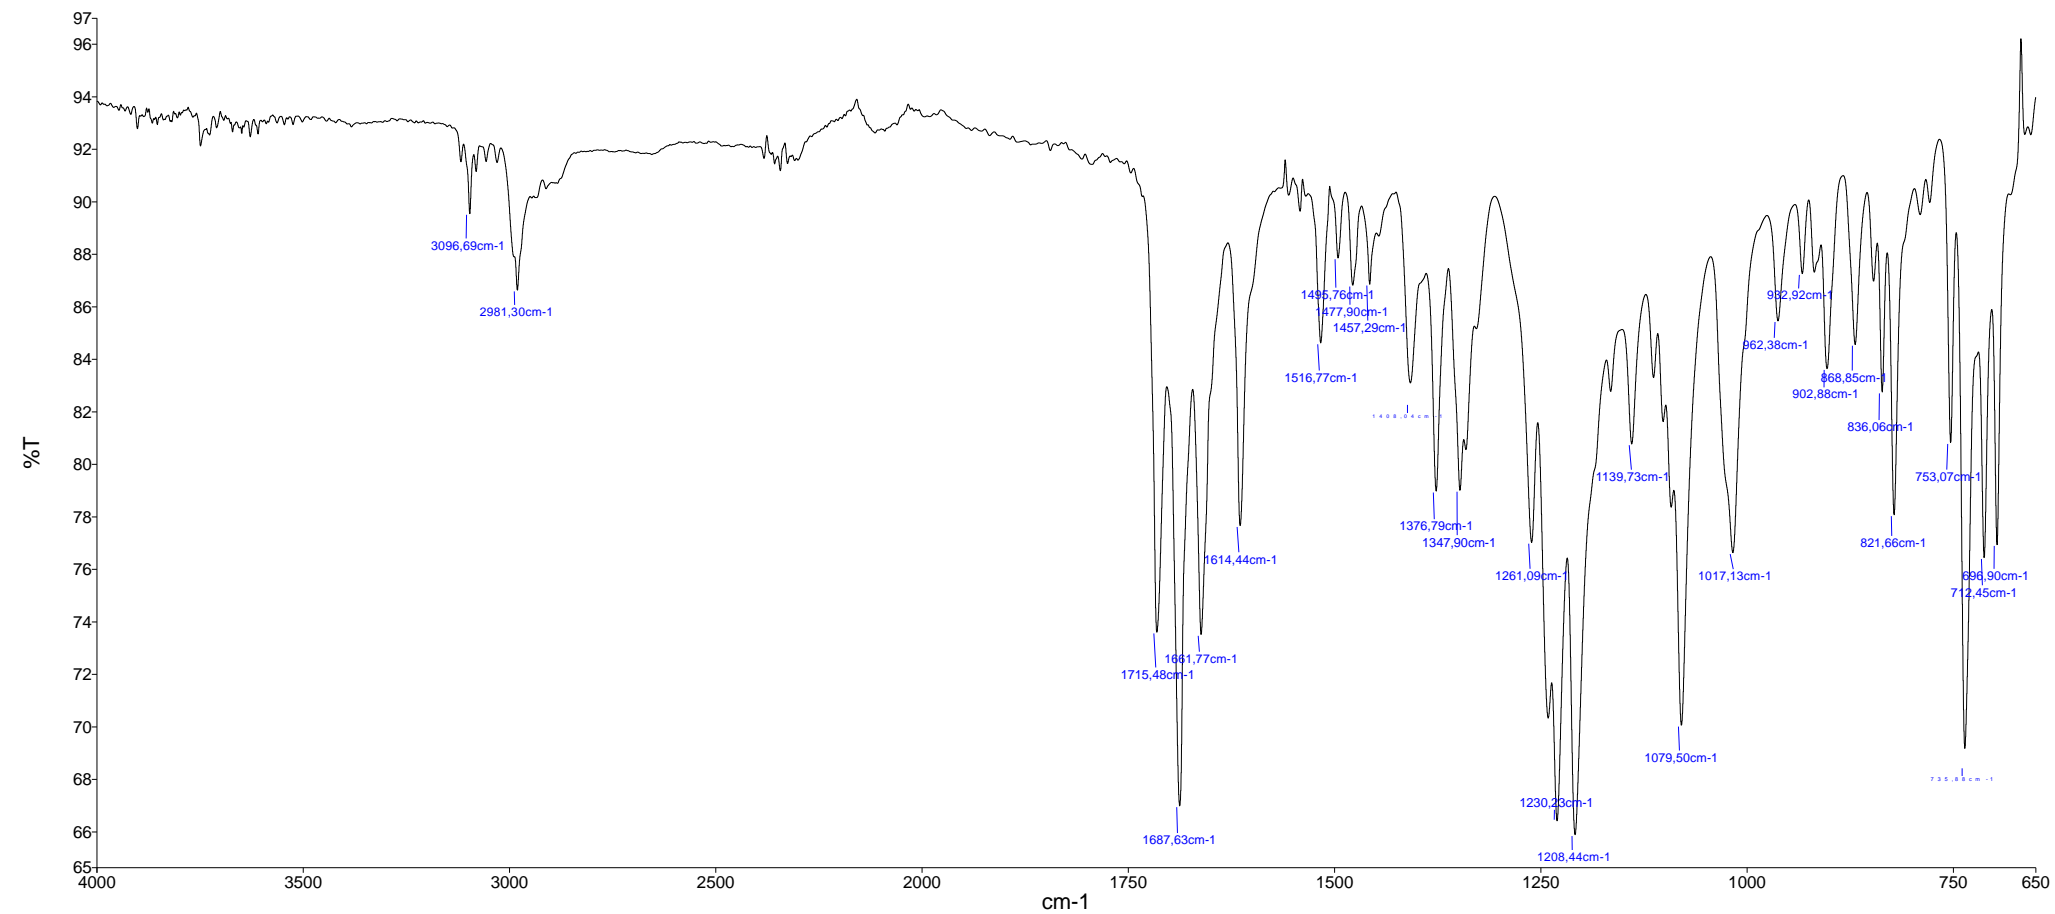

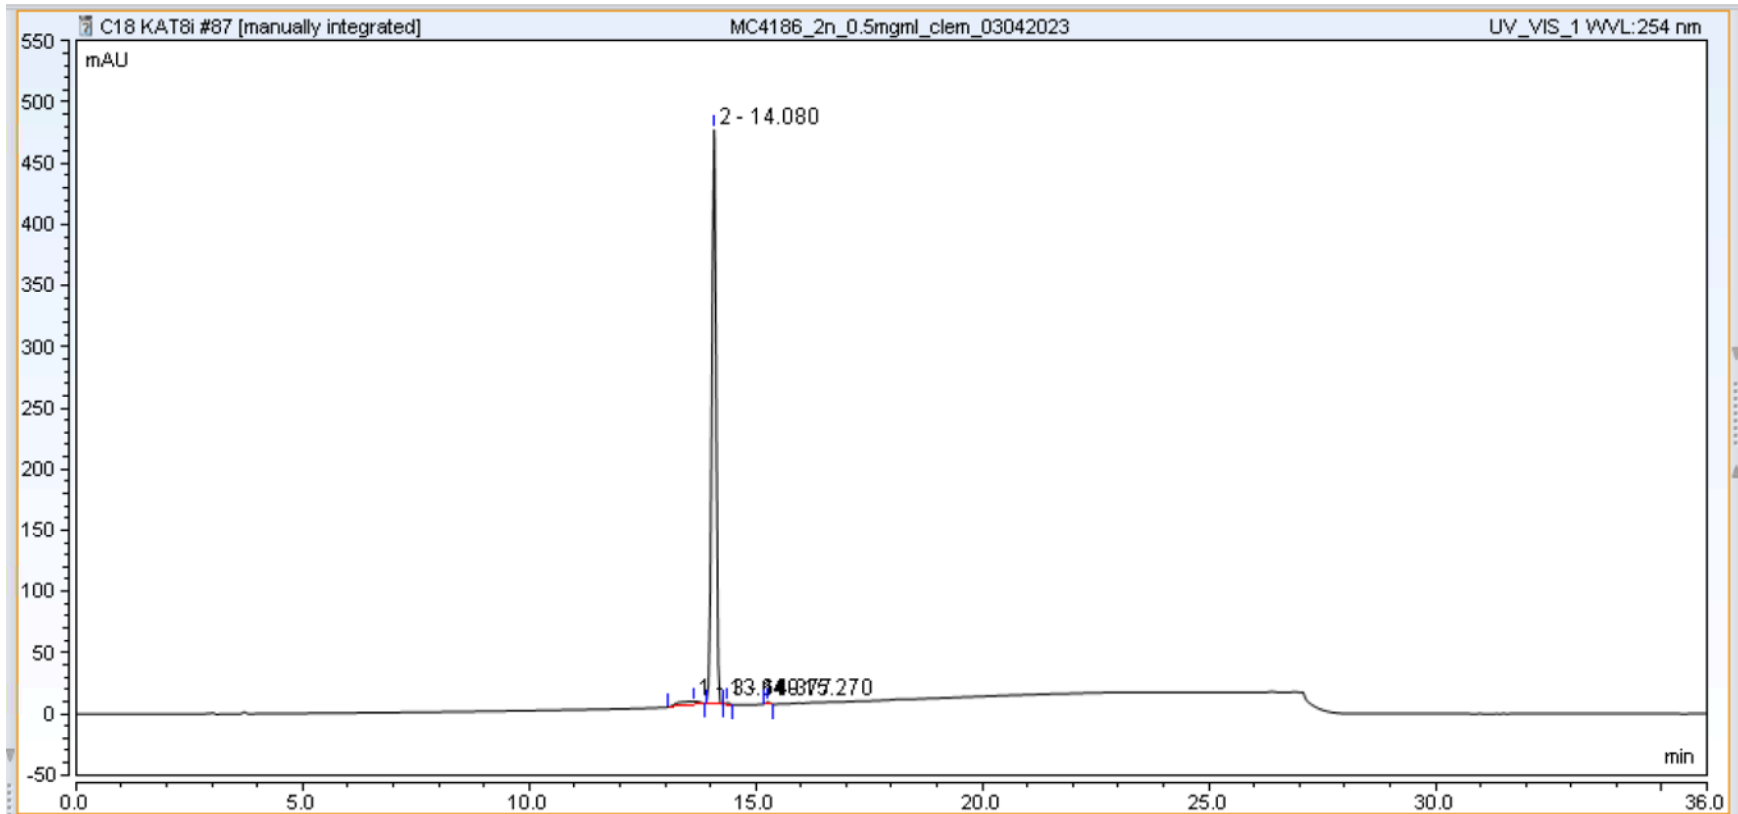

|    | A        | B             | C           | D           | E            | F          | G    | H              | I        | J         | K         |
|----|----------|---------------|-------------|-------------|--------------|------------|------|----------------|----------|-----------|-----------|
| 1  | Peak No. | Ret. Time min | Amount n.a. | Rel. Area % | Area mAU*min | Height mAU | Type | Width (50% min | Asym. EP | Resol. EP | Plates EP |
| 2  |          |               |             |             |              |            |      |                |          |           |           |
| 4  | 1        | 13.640        | n.a.        | 3.02        | 1.6319       | 2.56       | BMB* | 0.597          | 0.71     | 0.74      | 2892      |
| 5  | 2        | 14.080        | n.a.        | 96.36       | 52.0346      | 469.17     | BMB* | 0.105          | 0.92     | 1.74      | 100569    |
| 6  | 3        | 14.377        | n.a.        | 0.33        | 0.1798       | 1.83       | BMB* | 0.096          | 1.00     | 5.58      | 123520    |
| 7  | 4        | 15.270        | n.a.        | 0.29        | 0.1545       | 1.66       | BMB* | 0.093          | 1.03     | n.a.      | 150522    |
| 8  | Maximum  |               | 0.0000      | 96.36       | 52.0346      | 469.17     |      | 0.597          | 1.03     | 5.58      | 150522    |
| 9  | Minimum  |               | 0.0000      | 0.29        | 0.1545       | 1.66       |      | 0.093          | 0.71     | 0.74      | 2892      |
| 10 | Sum      |               | 0.0000      | 100.00      | 54.0007      | 475.21     |      |                |          |           |           |
| 11 |          |               |             |             |              |            |      |                |          |           |           |

# 3a MC4164

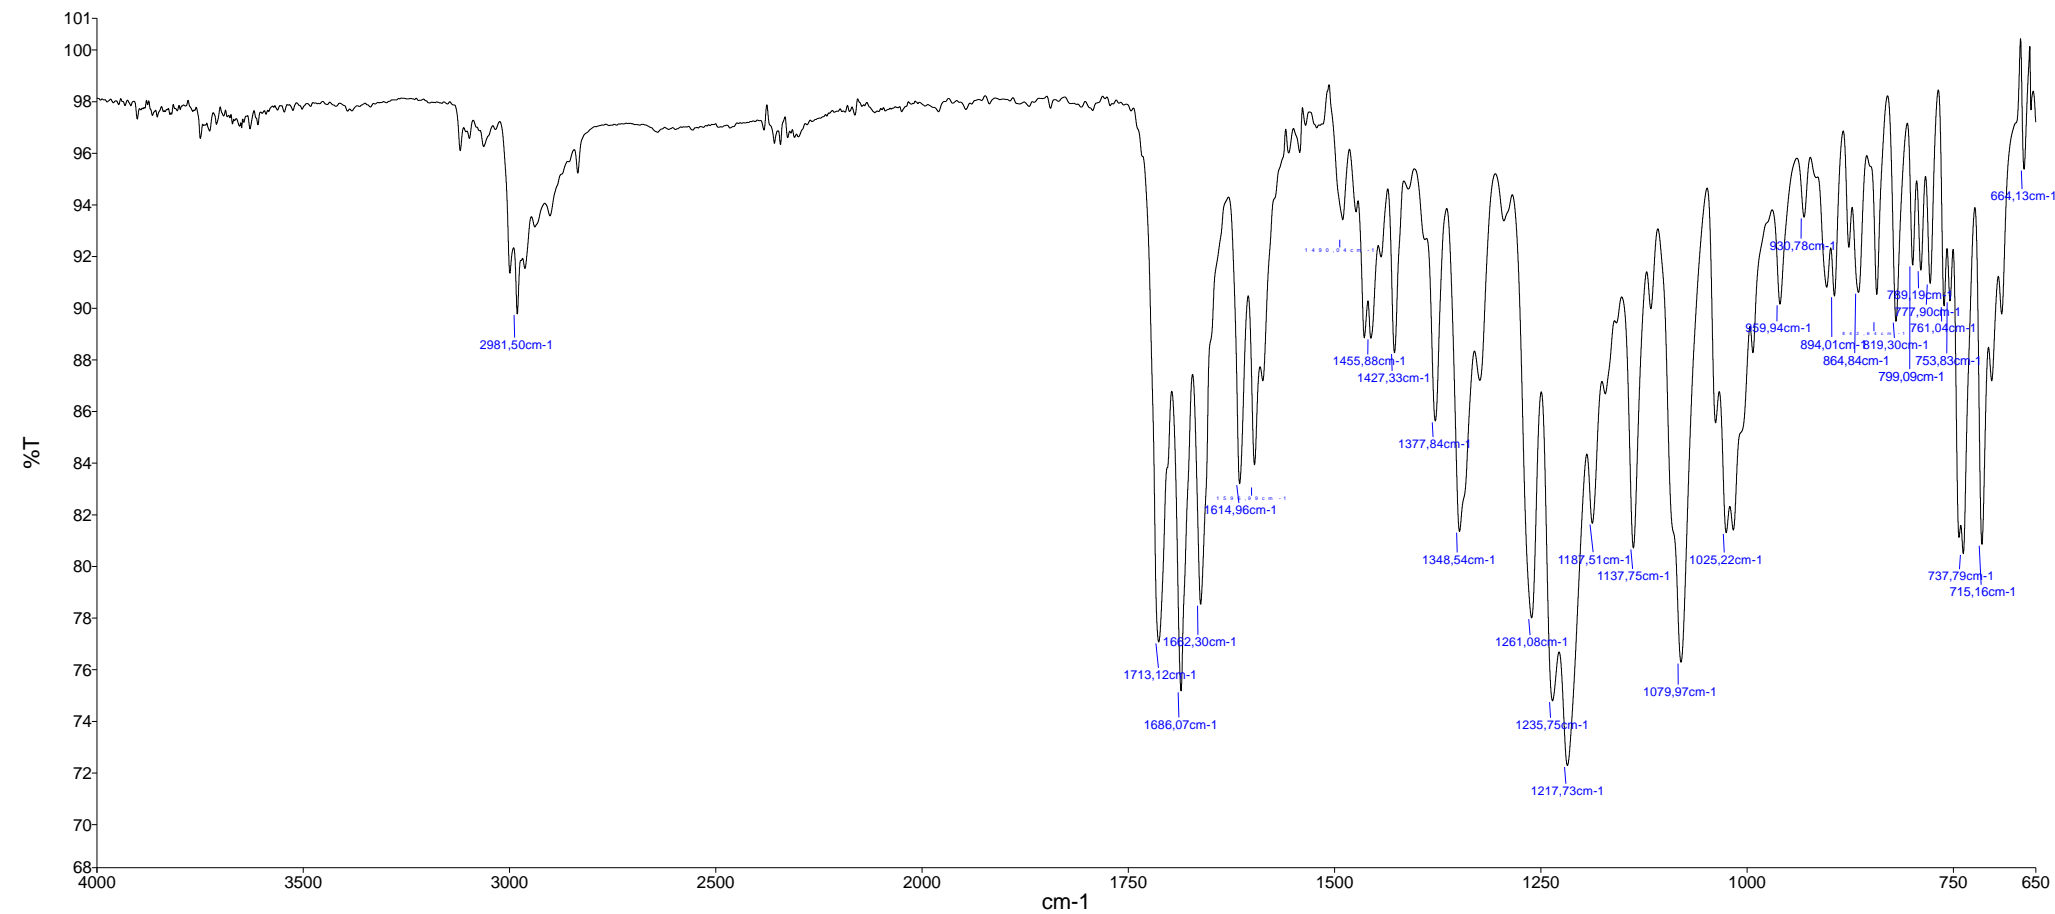

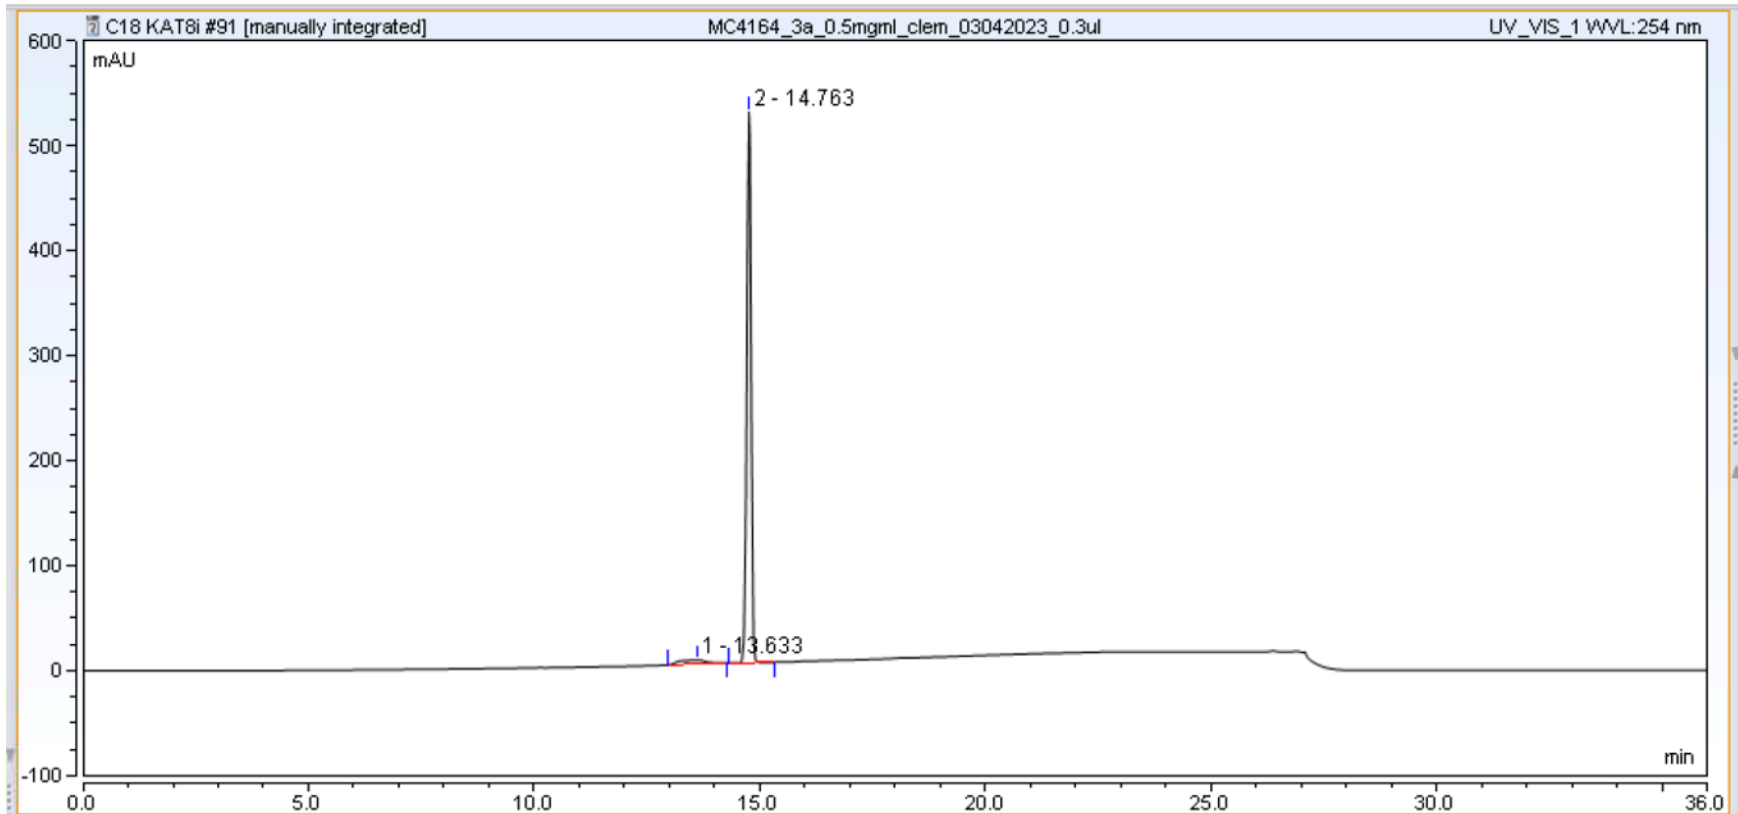

|   | A       | B        | C      | D        | E       | F      | G    | H          | I     | J      | K      |
|---|---------|----------|--------|----------|---------|--------|------|------------|-------|--------|--------|
| 1 | Peak    | Ret.Time | Amount | Rel.Area | Area    | Height | Type | Width (50% | Asym. | Resol. | Plates |
| 2 | No.     | min      | n.a.   | %        | mAU*min | mAU    |      | min        | EP    | EP     | EP     |
| 4 | 1       | 13.633   | n.a.   | 4.58     | 2.7398  | 3.79   | BMB* | 0.690      | 0.92  | 1.68   | 2163   |
| 5 | 2       | 14.763   | n.a.   | 95.42    | 57.0931 | 524.87 | BMB* | 0.102      | 0.94  | n.a.   | 116027 |
| 6 | Maximum |          | 0.0000 | 95.42    | 57.0931 | 524.87 |      | 0.690      | 0.94  | 1.68   | 116027 |
| 7 | Minimum |          | 0.0000 | 4.58     | 2.7398  | 3.79   |      | 0.102      | 0.92  | 1.68   | 2163   |
| 8 | Sum     |          | 0.0000 | 100.00   | 59.8328 | 528.66 |      |            |       |        |        |
| 9 |         |          |        |          |         |        |      |            |       |        |        |

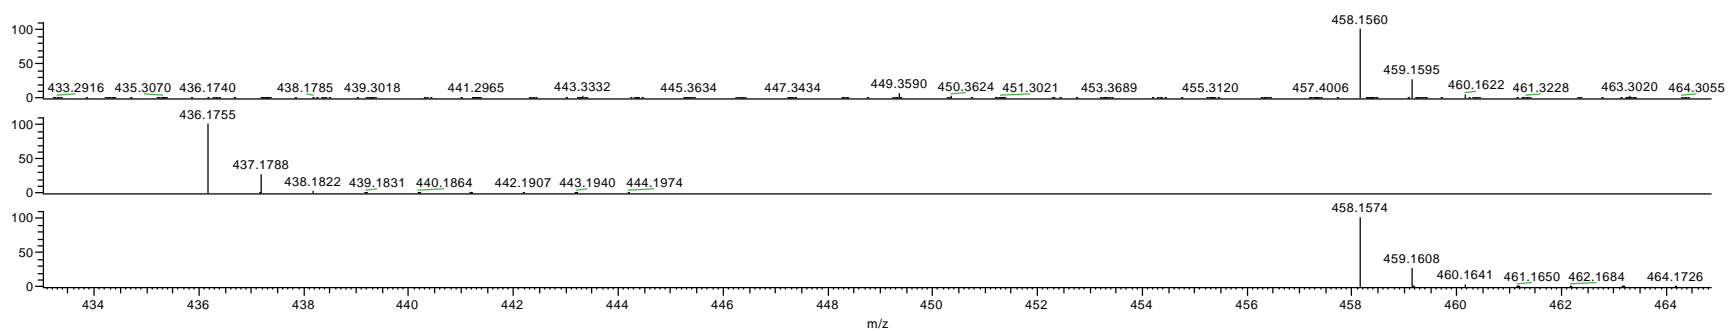

NL:  
 2.35E7  
 MC4164\_20230329120503#986-1000  
 RT: 5.36-5.43 AV: 15 T: FTMS + c ESI  
 Full ms [106.7000-1600.0000]

NL:  
 7.48E5  
 C<sub>25</sub>H<sub>25</sub>O<sub>6</sub>N<sub>1</sub>+H:  
 C<sub>25</sub>H<sub>25</sub>O<sub>6</sub>N<sub>1</sub>  
 pa Chrg 1

NL:  
 7.48E5  
 C<sub>25</sub>H<sub>25</sub>O<sub>6</sub>N<sub>1</sub>+Na:  
 C<sub>25</sub>H<sub>25</sub>O<sub>6</sub>N<sub>1</sub>Na<sub>1</sub>  
 pa Chrg 1

### 3b MC4182

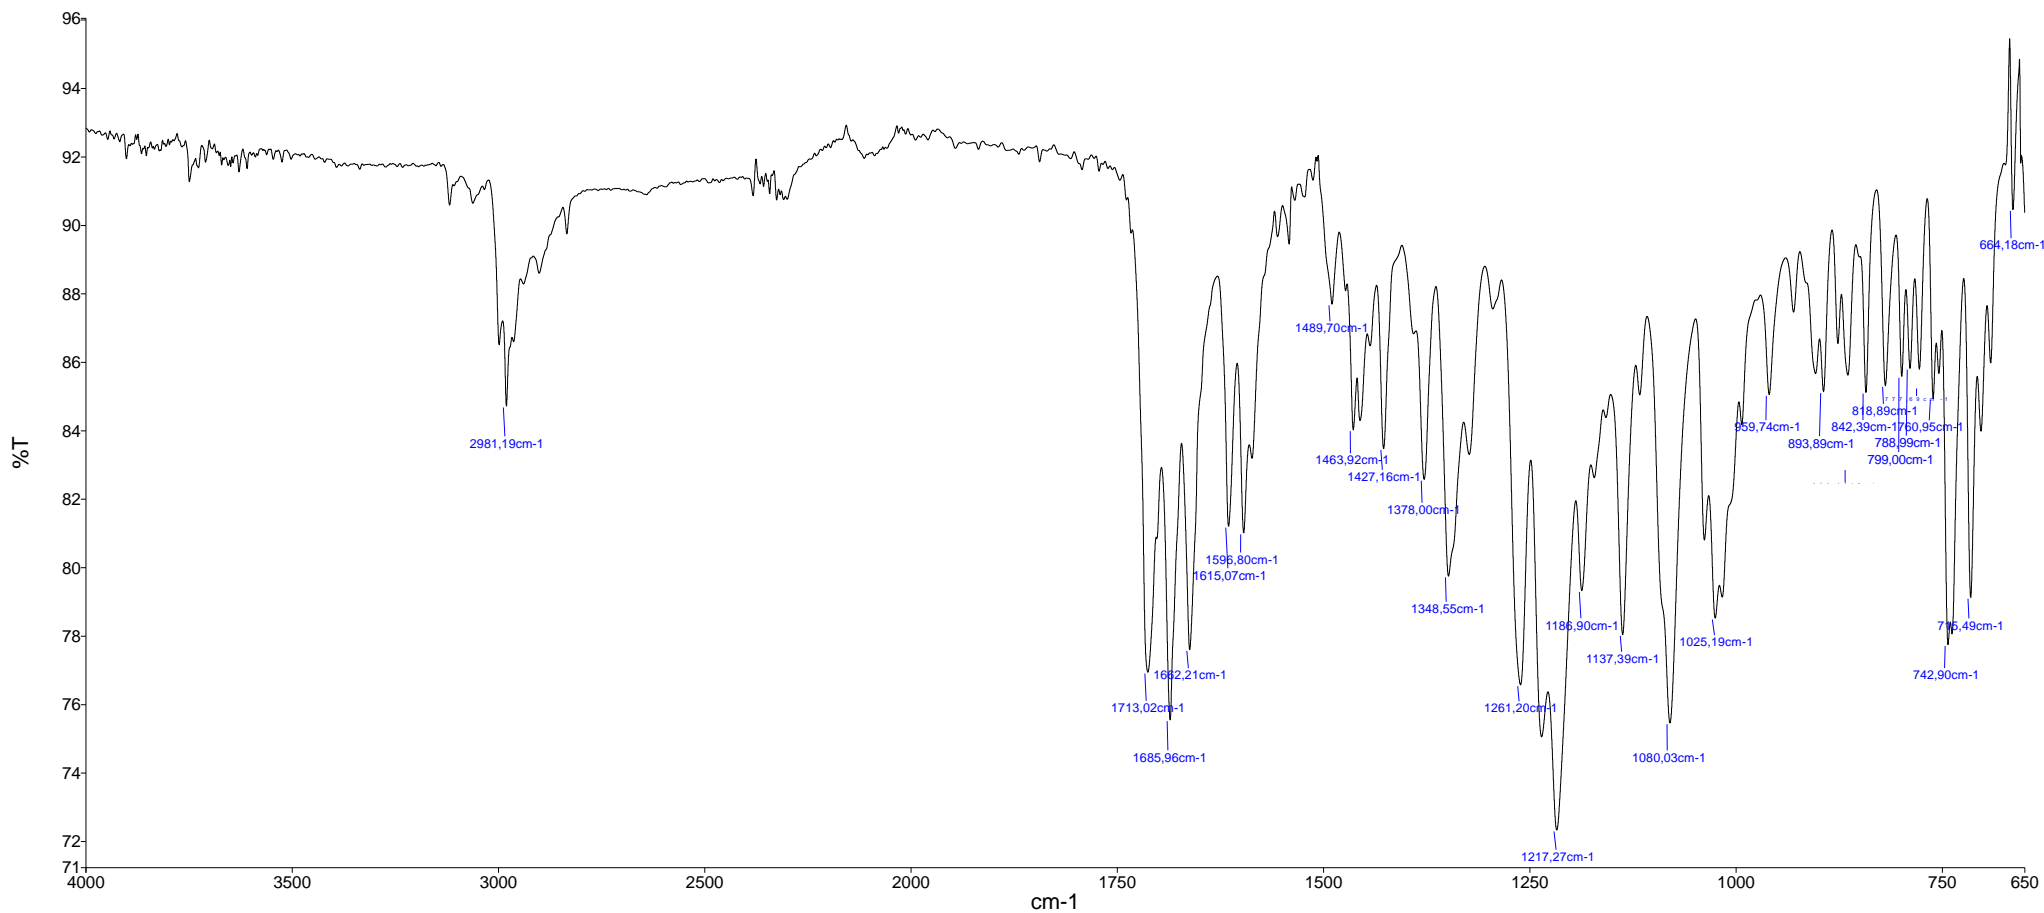

Nome Descrizione  
MC4182\_1

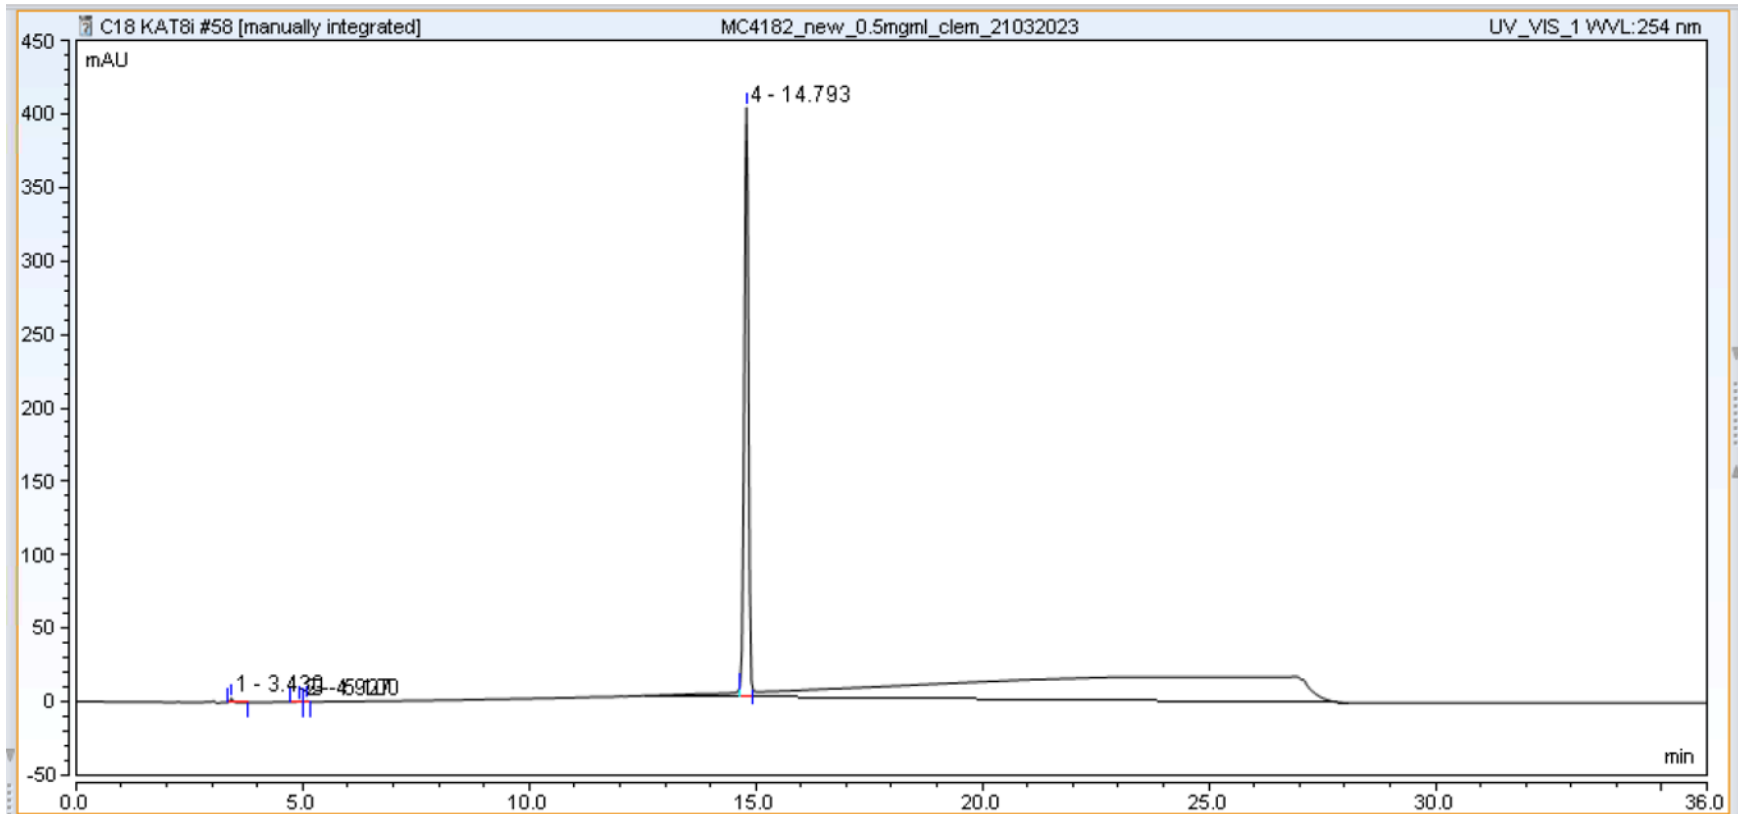

|    | A       | B        | C      | D        | E       | F      | G    | H          | I     | J      | K      |
|----|---------|----------|--------|----------|---------|--------|------|------------|-------|--------|--------|
| 1  | Peak    | Ret.Time | Amount | Rel.Area | Area    | Height | Type | Width (50% | Asym. | Resol. | Plates |
| 2  | No.     | min      | µl     | %        | mAU*min | mAU    |      | min        | EP    | EP     | EP     |
| 4  | 1       | 3.430    | n.a.   | 0.40     | 0.1731  | 3.09   | BMB* | 0.054      | 0.99  | 14.16  | 22415  |
| 5  | 2       | 4.927    | n.a.   | 0.12     | 0.0496  | 0.65   | BM * | 0.071      | 0.90  | 1.46   | 26827  |
| 6  | 3       | 5.100    | n.a.   | 0.10     | 0.0436  | 0.61   | MB*  | 0.070      | 0.94  | 68.12  | 29613  |
| 7  | 4       | 14.793   | n.a.   | 99.38    | 42.5068 | 401.33 | M *  | 0.098      | 0.93  | n.a.   | 125825 |
| 8  | Maximum |          | 0.0000 | 99.38    | 42.5068 | 401.33 |      | 0.098      | 0.99  | 68.12  | 125825 |
| 9  | Minimum |          | 0.0000 | 0.10     | 0.0436  | 0.61   |      | 0.054      | 0.90  | 1.46   | 22415  |
| 10 | Sum     |          | 0.0000 | 100.00   | 42.7731 | 405.68 |      |            |       |        |        |
| 11 |         |          |        |          |         |        |      |            |       |        |        |



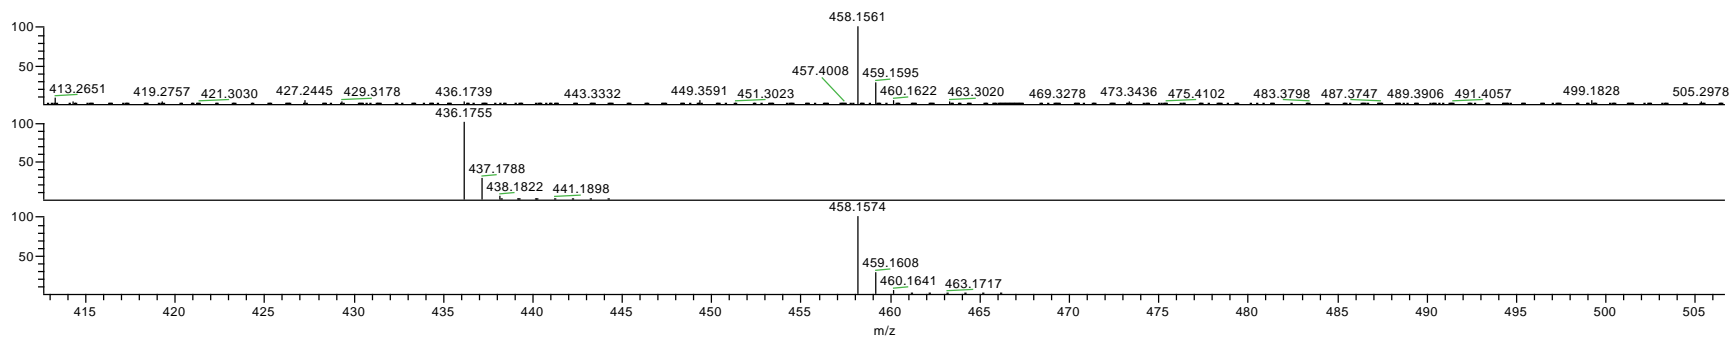

NL:  
 4.50E7  
 MC8182\_20230329115602#978-995  
 RT: 5.32-5.41 AV: 18 T: FTMS + c  
 ESI Full ms[106.7000-1600.0000]

NL:  
 7.48E5  
 C<sub>25</sub>H<sub>25</sub>O<sub>6</sub>N<sub>1</sub>+H:  
 C<sub>25</sub>H<sub>26</sub>O<sub>6</sub>N<sub>1</sub>  
 pa Chrg 1

NL:  
 7.48E5  
 C<sub>25</sub>H<sub>25</sub>O<sub>6</sub>N<sub>1</sub>+Na:  
 C<sub>25</sub>H<sub>25</sub>O<sub>6</sub>N<sub>1</sub>Na<sub>1</sub>  
 pa Chrg 1

# 3c MC4175

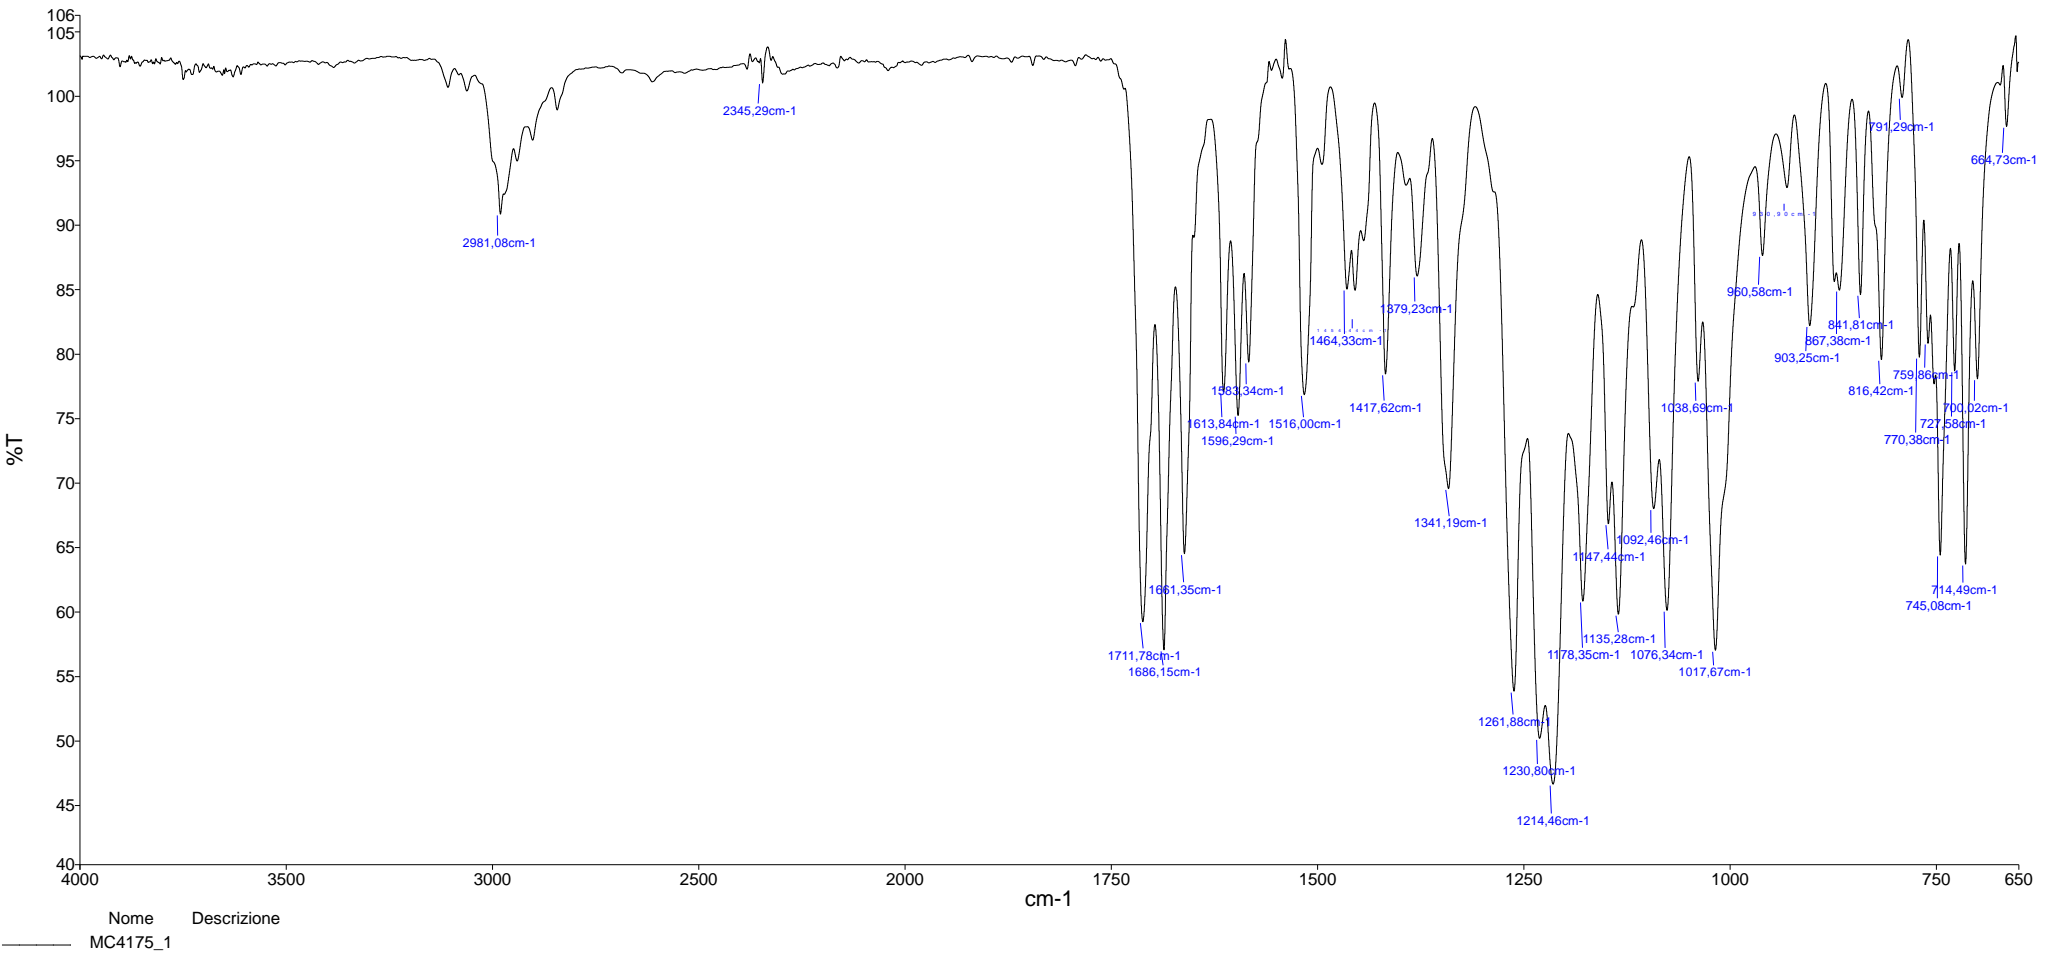

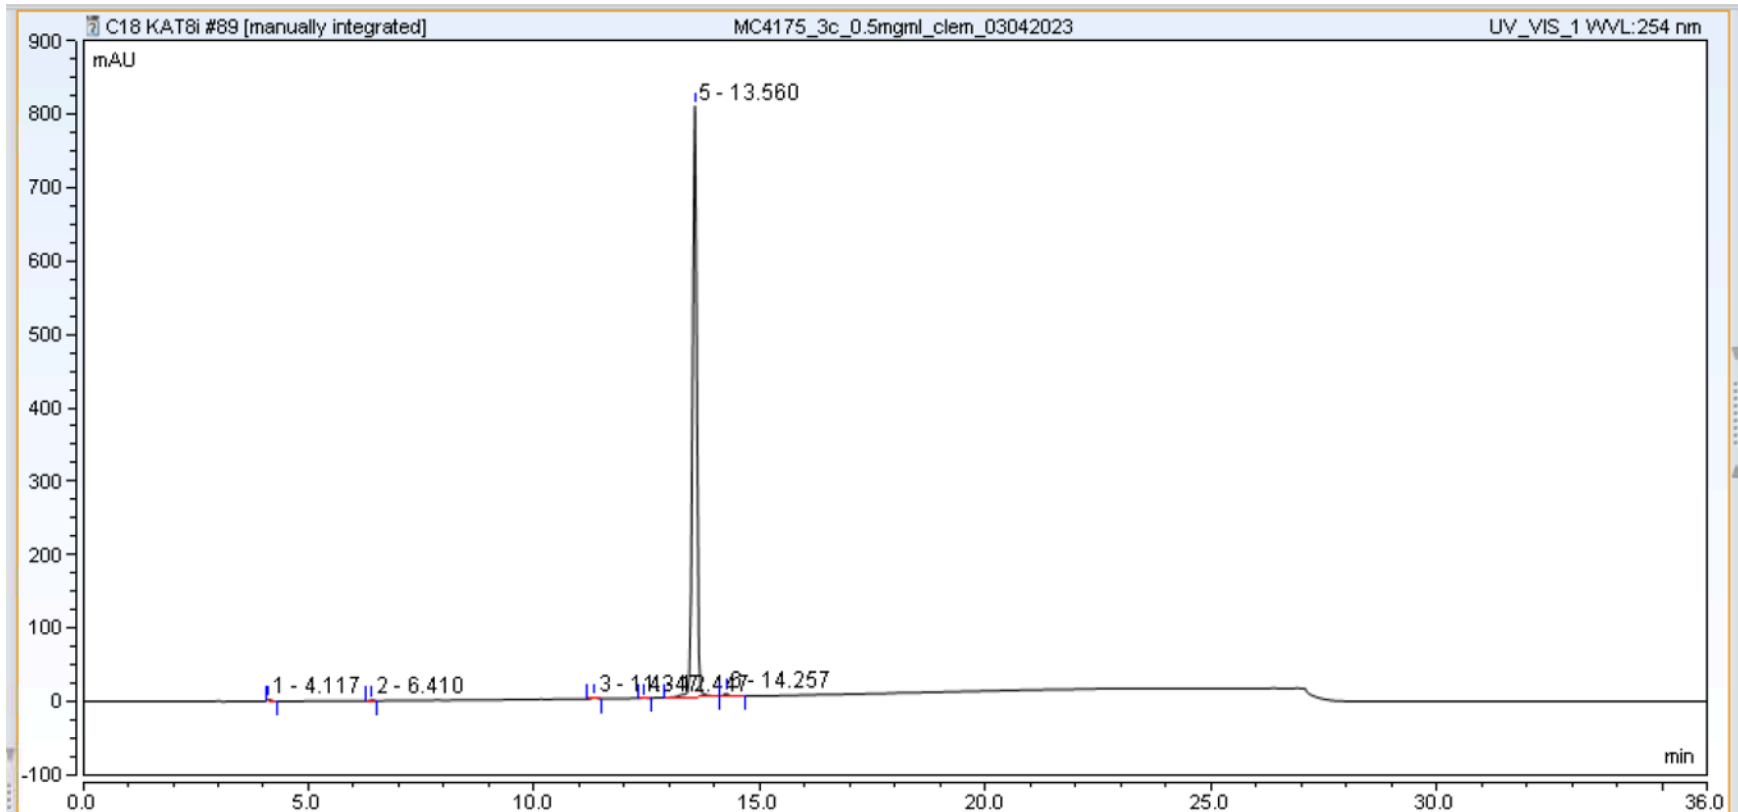

|    | A        | B            | C         | D          | E            | F          | G    | H              | I        | J         | K         |
|----|----------|--------------|-----------|------------|--------------|------------|------|----------------|----------|-----------|-----------|
| 1  | Peak No. | Ret.Time min | Amount µl | Rel.Area % | Area mAU*min | Height mAU | Type | Width (50% min | Asym. EP | Resol. EP | Plates EP |
| 4  | 1        | 4.117        | n.a.      | 0.14       | 0.1257       | 1.85       | BMB* | 0.068          | 1.63     | 17.50     | 20052     |
| 5  | 2        | 6.410        | n.a.      | 0.11       | 0.1000       | 1.09       | BMB  | 0.086          | 0.96     | 30.88     | 30654     |
| 6  | 3        | 11.347       | n.a.      | 0.24       | 0.2192       | 2.00       | BMB  | 0.102          | 0.89     | 6.35      | 67932     |
| 7  | 4        | 12.447       | n.a.      | 0.07       | 0.0637       | 0.60       | BMB* | 0.102          | 0.90     | 6.45      | 82676     |
| 8  | 5        | 13.560       | n.a.      | 98.81      | 89.8827      | 805.24     | BM   | 0.102          | 0.93     | 3.90      | 98028     |
| 9  | 6        | 14.257       | n.a.      | 0.63       | 0.5746       | 4.39       | MB   | 0.109          | n.a.     | n.a.      | 95469     |
| 10 | Maximum  |              | 0.0000    | 98.81      | 89.8827      | 805.24     |      | 0.109          | 1.63     | 30.88     | 98028     |
| 11 | Minimum  |              | 0.0000    | 0.07       | 0.0637       | 0.60       |      | 0.068          | 0.89     | 3.90      | 20052     |
| 12 | Sum      |              | 0.0000    | 100.00     | 90.9661      | 815.17     |      |                |          |           |           |
| 13 |          |              |           |            |              |            |      |                |          |           |           |

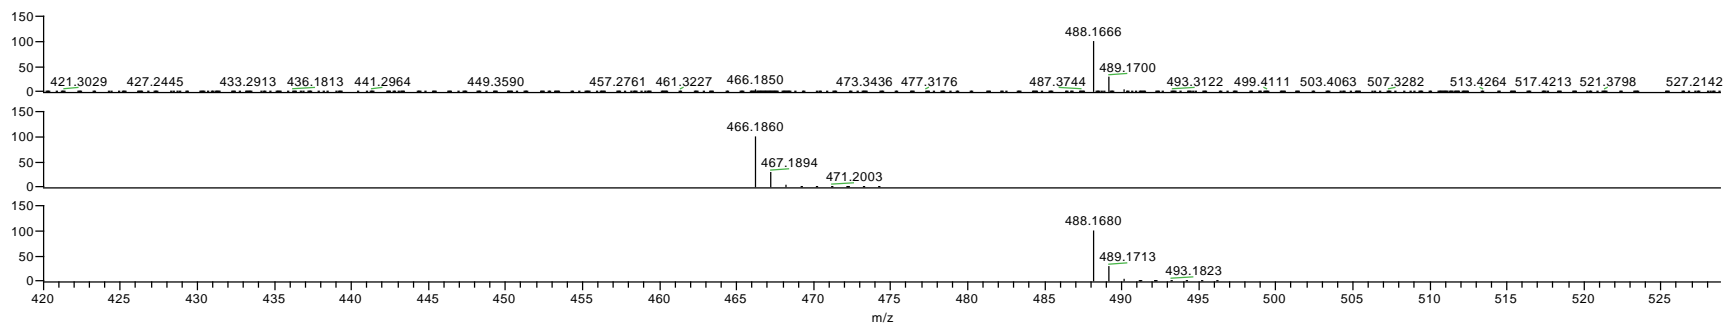

NL:  
 5.07E7  
 MC4175\_20230329122258#956-977  
 RT: 5.20-5.31 AV: 22 T: FTMS + c  
 ESI Full ms [106.7000-1600.0000]

NL:  
 7.38E5  
 C<sub>28</sub>H<sub>27</sub>O<sub>7</sub>N<sub>1</sub>+H:  
 C<sub>28</sub>H<sub>28</sub>O<sub>7</sub>N<sub>1</sub>  
 pa Chrg 1

NL:  
 7.38E5  
 C<sub>28</sub>H<sub>27</sub>O<sub>7</sub>N<sub>1</sub>+Na:  
 C<sub>28</sub>H<sub>27</sub>O<sub>7</sub>N<sub>1</sub>Na<sub>1</sub>  
 pa Chrg 1

### 3d MC4176

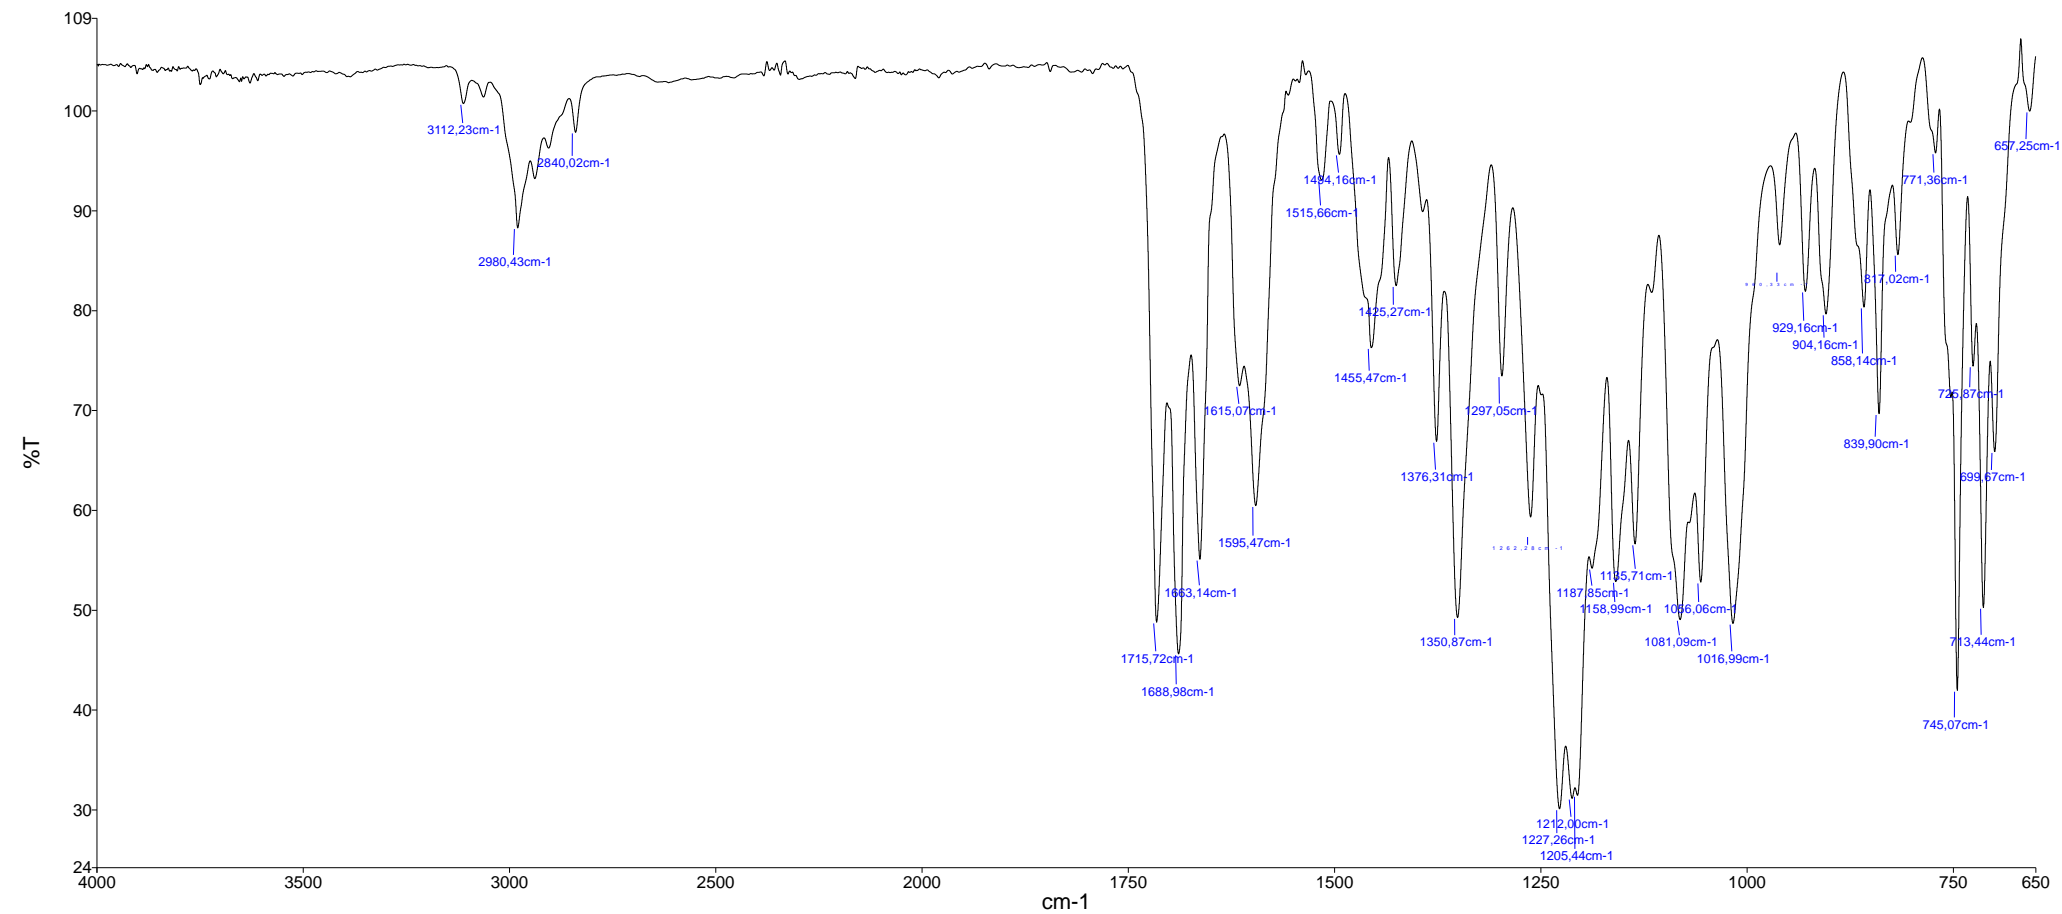

Nome Descrizione  
MC4176\_1

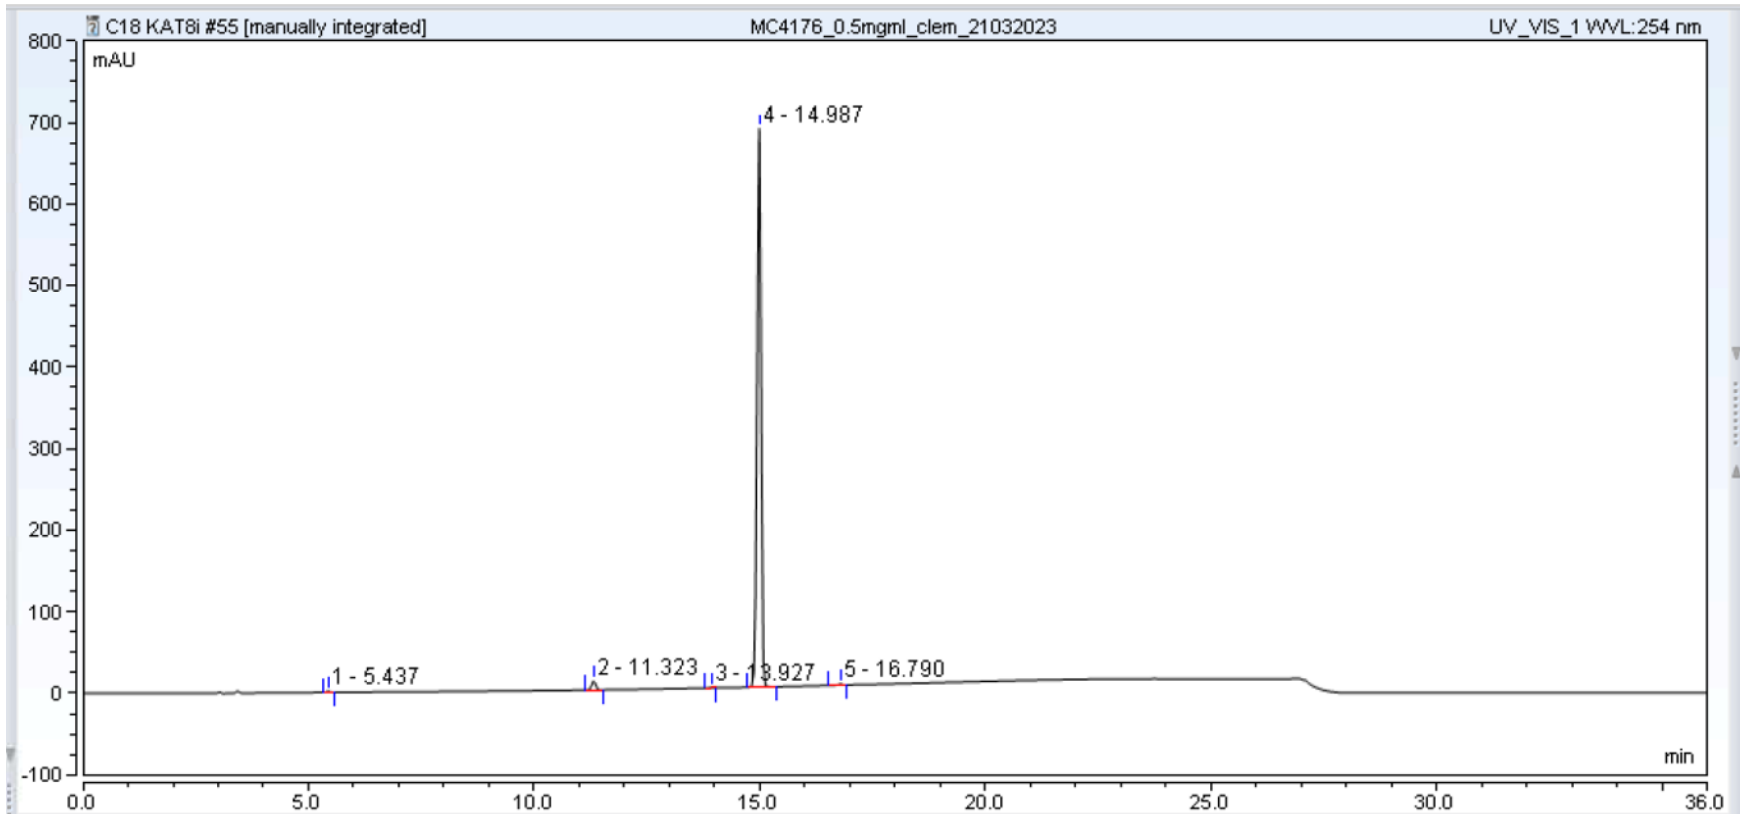

|    | A       | B        | C      | D        | E       | F      | G    | H          | I     | J      | K      |
|----|---------|----------|--------|----------|---------|--------|------|------------|-------|--------|--------|
| 1  | Peak    | Ret.Time | Amount | Rel.Area | Area    | Height | Type | Width (50% | Asym. | Resol. | Plates |
| 2  | No.     | min      | n.a.   | %        | mAU*min | mAU    |      | min        | EP    | EP     | EP     |
| 4  | 1       | 5.437    | n.a.   | 0.17     | 0.1215  | 1.48   | BMB  | 0.076      | 0.96  | 40.30  | 28036  |
| 5  | 2       | 11.323   | n.a.   | 1.62     | 1.1677  | 11.38  | BMB  | 0.096      | 0.94  | 16.35  | 77188  |
| 6  | 3       | 13.927   | n.a.   | 0.08     | 0.0543  | 0.57   | BMB  | 0.092      | 0.93  | 6.64   | 126928 |
| 7  | 4       | 14.987   | n.a.   | 97.91    | 70.7309 | 684.85 | BMB  | 0.096      | 0.94  | 10.96  | 134149 |
| 8  | 5       | 16.790   | n.a.   | 0.23     | 0.1654  | 1.53   | BMB  | 0.098      | 0.88  | n.a.   | 163418 |
| 9  | Maximum |          | 0.0000 | 97.91    | 70.7309 | 684.85 |      | 0.098      | 0.96  | 40.30  | 163418 |
| 10 | Minimum |          | 0.0000 | 0.08     | 0.0543  | 0.57   |      | 0.076      | 0.88  | 6.64   | 28036  |
| 11 | Sum     |          | 0.0000 | 100.00   | 72.2398 | 699.80 |      |            |       |        |        |
| 12 |         |          |        |          |         |        |      |            |       |        |        |

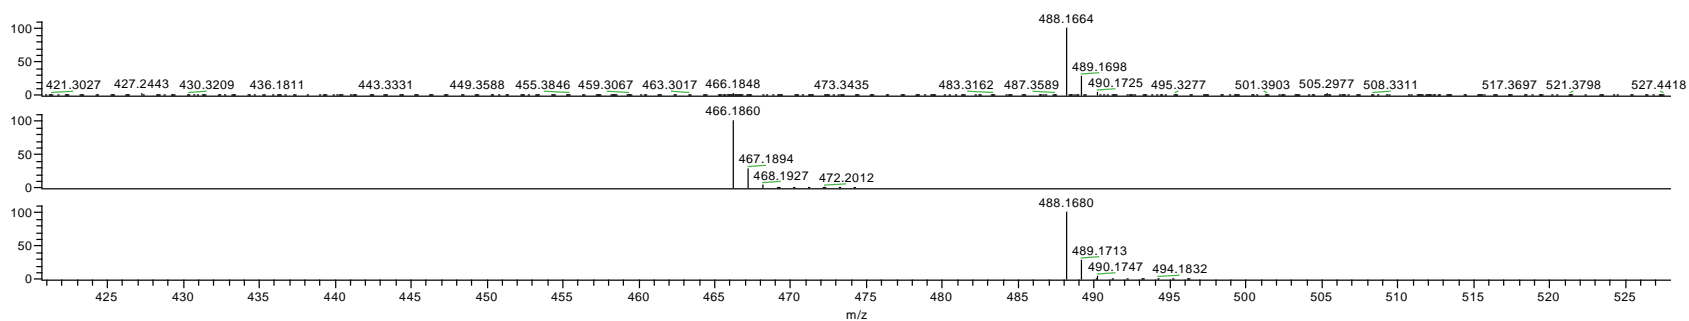

NL:  
5.90E7  
MC4176\_20230329121401#982-997  
RT: 5.35-5.43 AV: 16 T: FTMS + c  
ESI Full ms [106.7000-1600.0000]

NL:  
7.38E5  
C<sub>26</sub>H<sub>27</sub>O<sub>7</sub>N<sub>1</sub>+H:  
C<sub>26</sub>H<sub>28</sub>O<sub>7</sub>N<sub>1</sub>  
pa Chrg 1

NL:  
7.38E5  
C<sub>26</sub>H<sub>27</sub>O<sub>7</sub>N<sub>1</sub>+Na:  
C<sub>26</sub>H<sub>27</sub>O<sub>7</sub>N<sub>1</sub>Na<sub>1</sub>  
pa Chrg 1

**Table S2. Elemental analysis of final compounds 2a-n and 3a-d**

| LAB    | CMP | Elemental analysis |      |      |       |       |      |      |       |
|--------|-----|--------------------|------|------|-------|-------|------|------|-------|
|        |     | Calculated         |      |      |       | found |      |      |       |
|        |     | C                  | H    | N    | O     | C     | H    | N    | O     |
| MC4199 | 2a  | 70.05              | 7.10 | 3.40 | 19.44 | 69.92 | 7.18 | 3.39 | 19.48 |
| MC4158 | 2b  | 68.08              | 5.24 | 3.31 | 18.89 | 68.13 | 5.27 | 3.26 | 18.94 |
| MC4168 | 2c  | 68.08              | 5.24 | 3.31 | 18.89 | 68.01 | 5.19 | 3.37 | 18.95 |
| MC4172 | 2d  | 65.53              | 5.04 | 3.18 | 18.19 | 65.45 | 5.10 | 3.13 | 18.22 |
| MC4166 | 2e  | 65.53              | 5.04 | 3.18 | 18.19 | 65.55 | 4.98 | 3.20 | 18.16 |
| MC4181 | 2f  | 59.52              | 4.58 | 2.89 | 16.52 | 59.47 | 4.64 | 2.84 | 16.59 |
| MC4185 | 2g  | 59.52              | 4.58 | 2.89 | 16.52 | 59.49 | 4.56 | 2.86 | 16.48 |
| MC4165 | 2h  | 64.00              | 4.92 | 6.22 | 24.86 | 64.05 | 4.98 | 6.17 | 24.79 |
| MC4167 | 2i  | 64.00              | 4.92 | 6.22 | 24.86 | 63.97 | 4.88 | 6.26 | 24.93 |
| MC4177 | 2j  | 69.76              | 5.15 | 6.51 | 18.58 | 69.71 | 5.18 | 6.48 | 18.65 |
| MC4208 | 12k | 71.58              | 6.01 | 3.34 | 19.07 | 71.63 | 6.07 | 3.29 | 19.10 |
| MC4204 | 2l  | 66.83              | 5.35 | 3.54 | 24.28 | 66.88 | 5.33 | 3.59 | 24.21 |
| MC4188 | 2m  | 64.22              | 5.14 | 3.40 | 19.44 | 64.17 | 5.19 | 3.35 | 19.50 |
| MC4186 | 2n  | 64.22              | 5.14 | 3.40 | 19.44 | 64.26 | 5.11 | 3.42 | 19.39 |
| MC4175 | 3a  | 67.09              | 5.85 | 3.01 | 24.06 | 67.13 | 5.89 | 2.94 | 24.11 |
| MC4176 | 3b  | 67.09              | 5.85 | 3.01 | 24.06 | 67.02 | 5.91 | 3.08 | 24.12 |
| MC4164 | 3c  | 68.95              | 5.79 | 3.22 | 22.04 | 68.99 | 5.83 | 3.19 | 22.08 |
| MC4182 | 3d  | 68.95              | 5.79 | 3.22 | 22.04 | 69.03 | 5.72 | 3.27 | 21.99 |



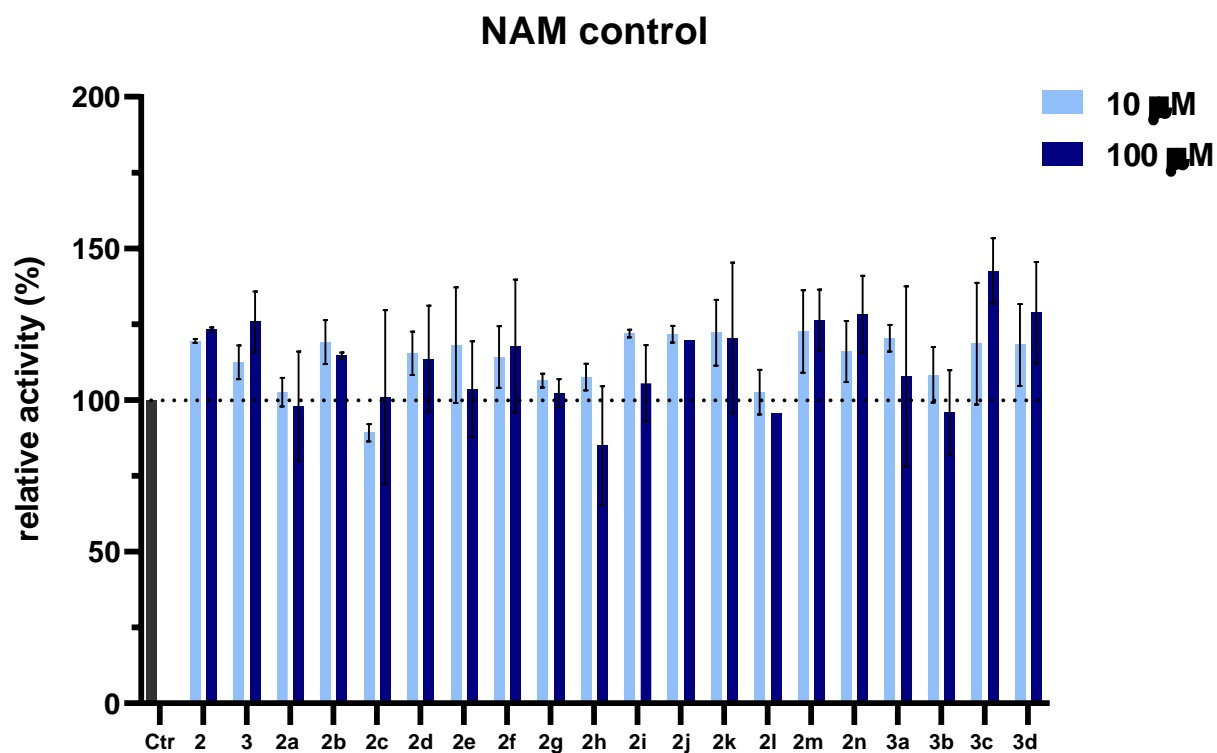

**Figure S1.** Control experiments for potential compound effects on the coupled enzymes of the assay system. The conversion of 50  $\mu$ M NAM, the product of the Sirtuin-catalyzed reaction, by the coupled enzymes was tested in presence of DMSO (reference) and 10  $\mu$ M or 100  $\mu$ M of each compound.

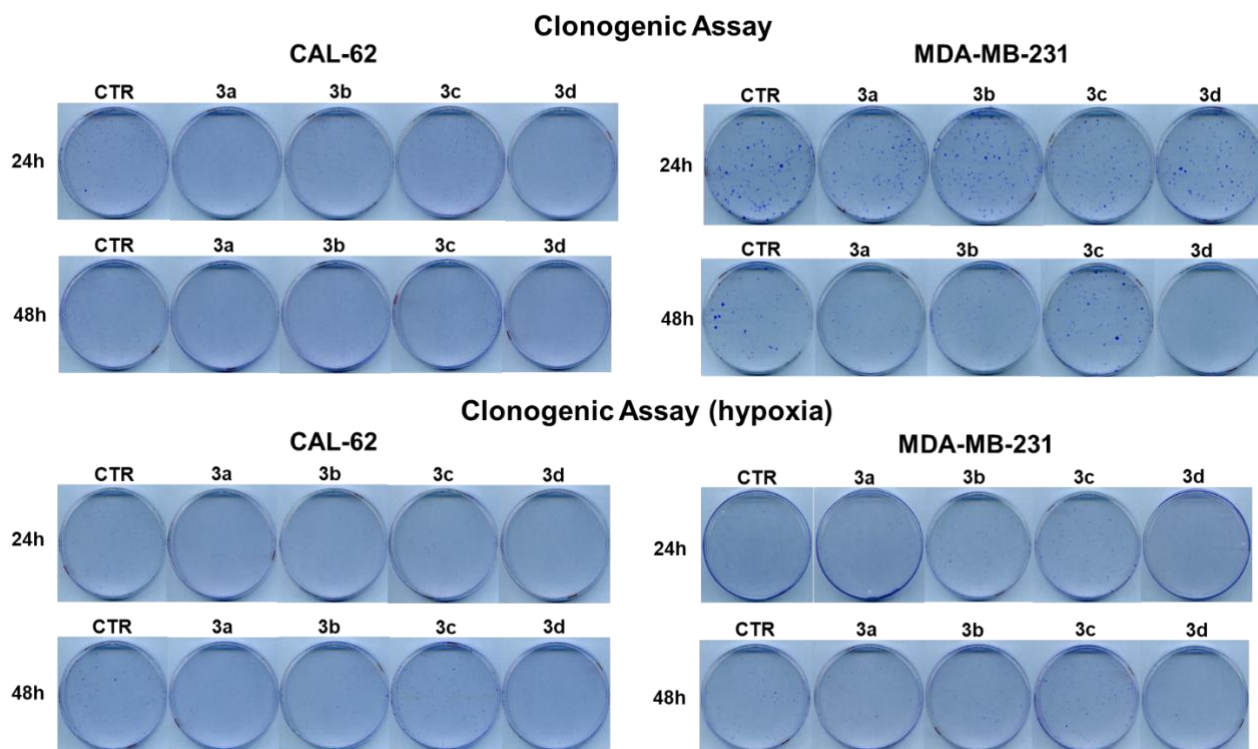

**Figure S2.** Representative plate images of the colony formation assay for CAL-62 and MDA-MB-231 cells treated with the SIRT3 activators **3a-d** at 50  $\mu$ M for 24 and 48 h.

### Clonogenic Assay, CAL-62

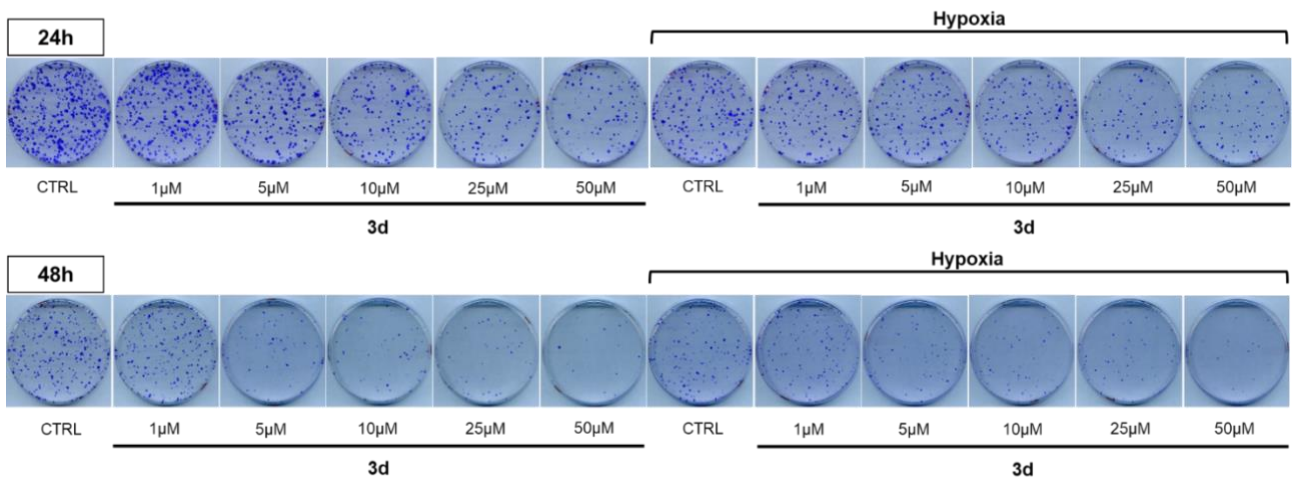

### Clonogenic Assay, MDA-MB-231

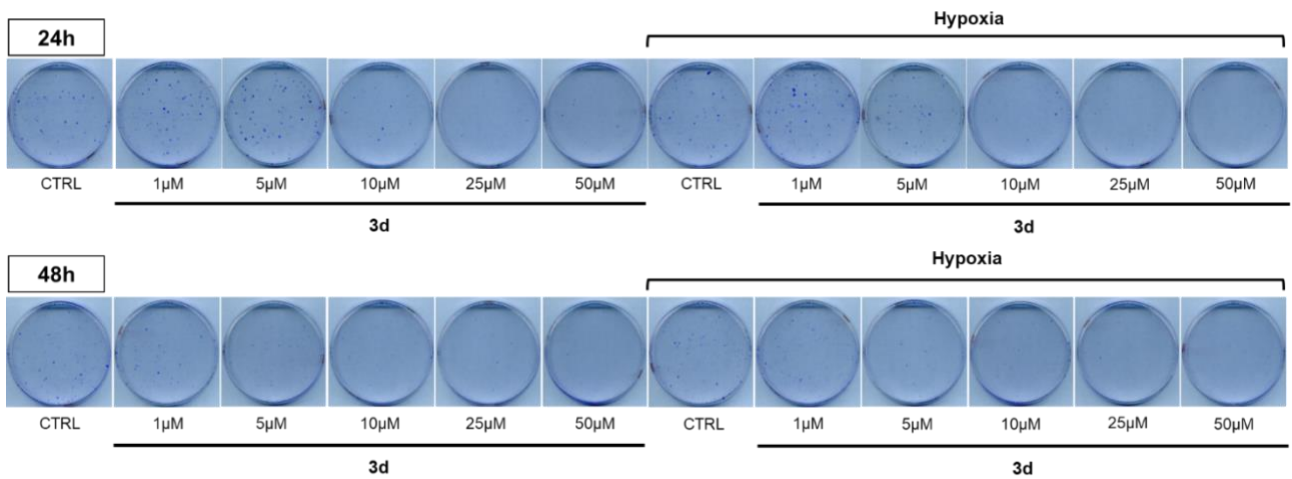

**Figure S3.** Representative plate images of the colony formation assay for CAL-62 and MDA-MB-231 cells treated with increasing dose (1, 5, 10, 25 and 50 μM) of the SIRT3 activator **3d** for 24 and 48 h.

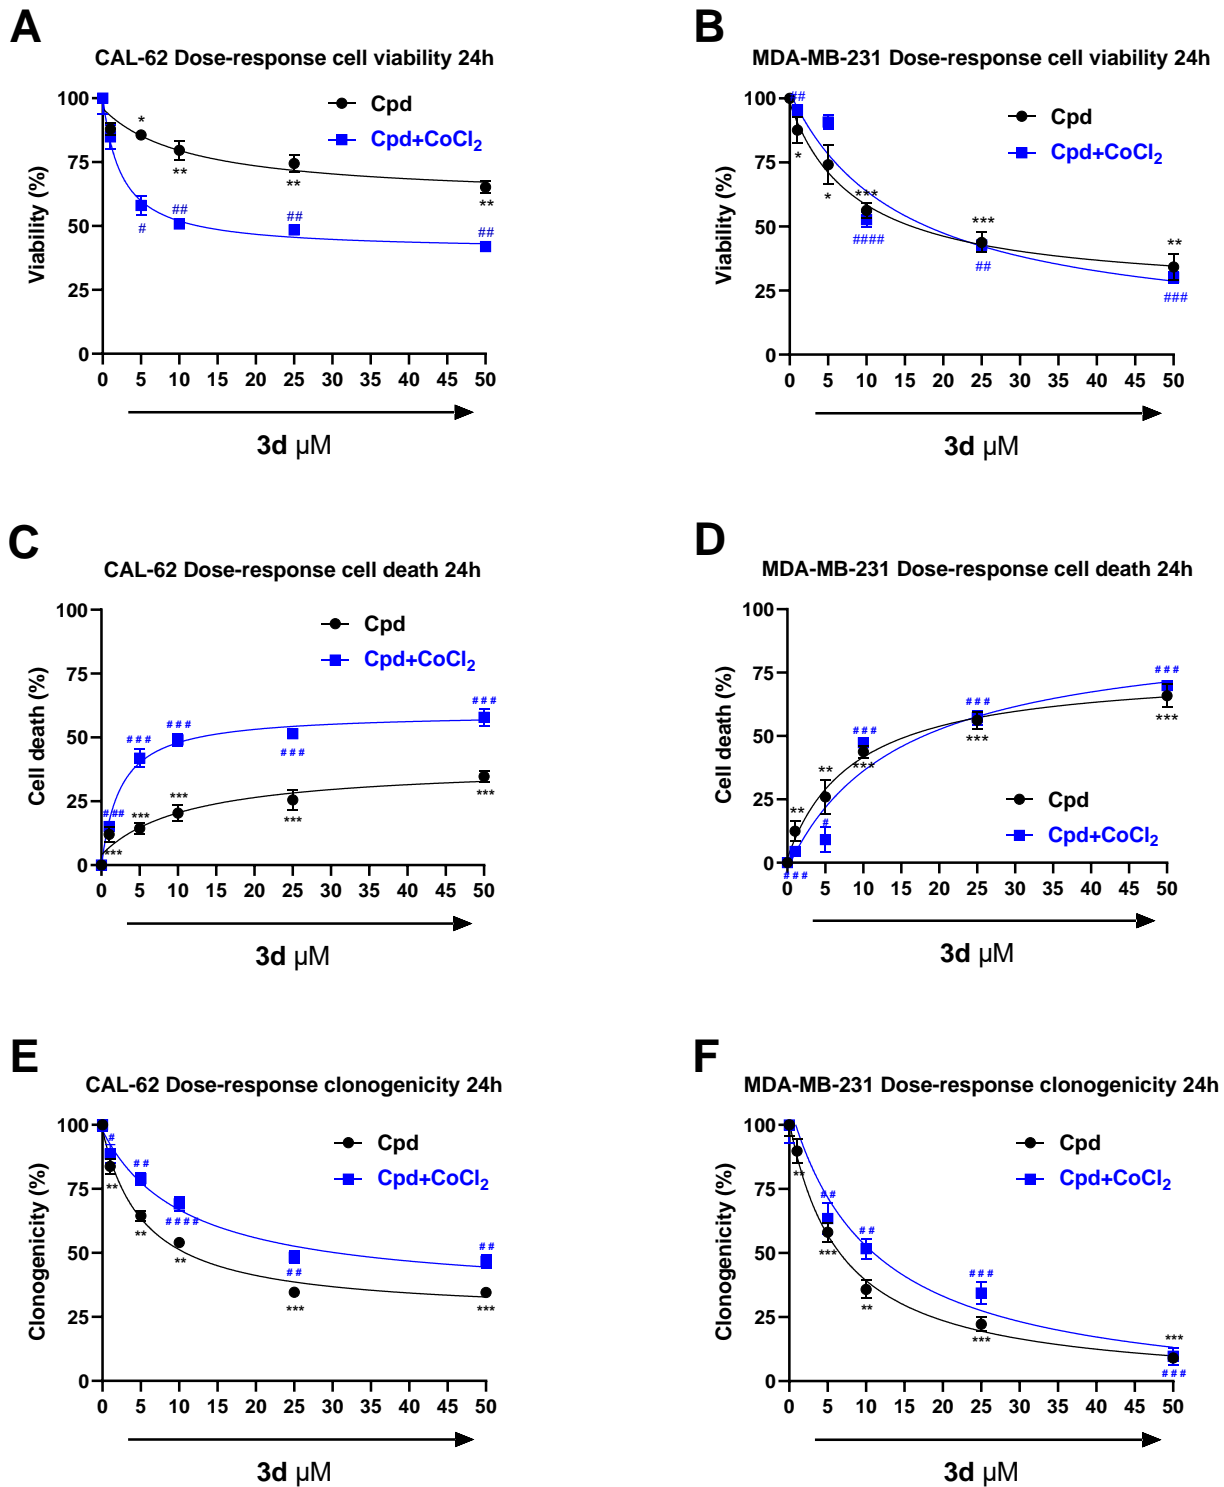

**Figure S4.** Dose-dependent effects of compound **3d** on cell viability, cell death and clonogenicity in CAL-62 (A, C, E) and MDA-MB-231 (B, D, F) cells upon 24 h of treatment. p-values were obtained using a Student's t-test (\* $p < 0.05$ , \*\* $p < 0.01$ , \*\*\* $p < 0.001$ , \*\*\*\* $p < 0.0001$ ); # $p < 0.05$ , ## $p < 0.01$ , ### $p < 0.001$ , #### $p < 0.0001$ ) for three independent experiments.

**Table S3.** List of Primers used in gene expression analysis.

| OLIGO FORWARD                 | OLIGO REVERSE                    |
|-------------------------------|----------------------------------|
| L32: GGAGCGACTGCTACGGAAG      | L32: GATACTGTCCAAAAGGCTGGAA      |
| SLUG: ATGAGGAATCTGGCTGCTGT    | SLUG: CTCTCTCTGTGGGTGTGTGT       |
| ZEB1: CAGGGAGGAGCAGTGAAAGA    | ZEB1: CTCTTCAGGTGCCTCAGGAA       |
| MMP2: ATGCCGCCTTTAACTGGAG     | MMP2: GGAAAGCCAGGATCCATTTT       |
| SNAIL: CACTATGCCGCGCTCTTTC    | SNAIL: GCTGGAAGGTAAACTCTGGATTAGA |
| MMP9: CTACTGTGCCTTTGAGTCC     | MMP9: AGAGAATCGCCAGTACTTCC       |
| COL1A2: TGCAAGAACAGCATTGCATAC | COL1A2: GGCAGGCGAGATGGCTTATTTGTT |

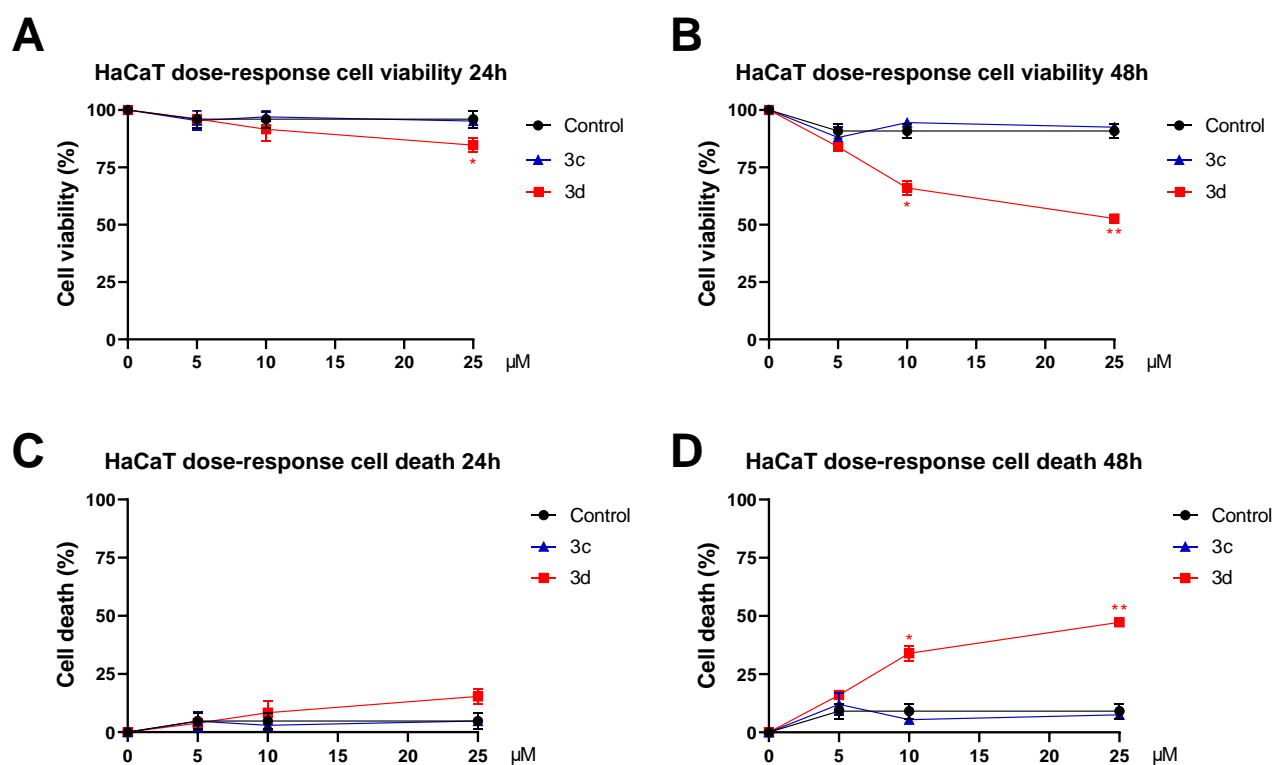

**Figure S5.** Dose-dependent effects of compounds **3c** and **3d** on cell viability (A, B) and cell death induction (C, D) in non-cancer HaCaT cells upon 24 h (A, C) and 48 h (B, D) of treatment. p-values were obtained using a Student's t-test (\*p < 0.05, \*\*p < 0.01) for three independent experiments.

| <b>A) Cell viability (%) T24 cpd 3d</b> |        |            |       |
|-----------------------------------------|--------|------------|-------|
| Cpd conc.                               | CAL-62 | MDA-MB-231 | HaCaT |
| 5 $\mu$ M                               | 85,7   | 74,1       | 96,1  |
| 10 $\mu$ M                              | 79,6   | 56,2       | 91,6  |
| 25 $\mu$ M                              | 74,4   | 42,8       | 84,7  |

| <b>B) Cell viability (%) T48 cpd 3d</b> |        |            |       |
|-----------------------------------------|--------|------------|-------|
| Cpd conc.                               | CAL-62 | MDA-MB-231 | HaCaT |
| 5 $\mu$ M                               | 78,3   | 51,7       | 83,9  |
| 10 $\mu$ M                              | 63,5   | 36,3       | 66,1  |
| 25 $\mu$ M                              | 33,8   | 21,1       | 52,7  |

| <b>C) Cell death (%) T24 cpd 3d</b> |        |            |       |
|-------------------------------------|--------|------------|-------|
| Cpd conc.                           | CAL-62 | MDA-MB-231 | HaCaT |
| 5 $\mu$ M                           | 14,3   | 25,9       | 3,9   |
| 10 $\mu$ M                          | 20,4   | 43,8       | 8,4   |
| 25 $\mu$ M                          | 25,6   | 57,2       | 15,3  |

| <b>D) Cell death (%) T48 cpd 3d</b> |        |            |       |
|-------------------------------------|--------|------------|-------|
| Cpd conc.                           | CAL-62 | MDA-MB-231 | HaCaT |
| 5 $\mu$ M                           | 21,7   | 48,3       | 16,1  |
| 10 $\mu$ M                          | 36,6   | 63,6       | 33,9  |
| 25 $\mu$ M                          | 66,1   | 78,8       | 47,3  |

**Tables S4 (A-D).** Quantification of living (A, B) and death cells (C, D) upon 24 h (A, C) and 48 h (B, D) of treatment relative to three independent experiments. Cell lines are indicated.
